# Supplementary material for: Effect of Thermal Processing on the Metabolic Components of Black Beans on Ultra-High-Performance Liquid Chromatography Coupled with High-Field Quadrupole-Orbitrap High-Resolution Mass Spectrometry
Source: MDPI journal article supplement (doi:10.3390/molecules27123919), 2022-06-18
Supplement: s1 [file s1]

## **Supplementary Materials- Tables**

Table S1 Table S1 List of all metabolites

Table S2 List of differential metabolites between unprocessed black soybeans and cooked black soybeans

Table S3 List of differential metabolites between Unprocessed black soybeans and Steamed black soybeans

Table S4 List of differential metabolites between cooked black soybeans and Steamed black soybeans

**Table S1 List of all metabolites**

|    | Name                                                                                      | score | RT      | m/z     | classification | Acquisition | unprocessed    | steamed black | cooked         |
|----|-------------------------------------------------------------------------------------------|-------|---------|---------|----------------|-------------|----------------|---------------|----------------|
|    |                                                                                           |       |         |         | n              | mode        | black soybeans | soybeans      | black soybeans |
| 1  | L-Valine                                                                                  | 1.000 | 323.052 | 116.071 | amino acid     | [H]-        | +              | +             | +              |
| 2  | L-Norleucine                                                                              | 1.000 | 329.139 | 130.086 | amino acid     | [H]-        | +              | +             | +              |
| 3  | Ornithine                                                                                 | 0.999 | 529.169 | 131.081 | amino acid     | [H]-        | +              | +             | +              |
| 4  | L-Proline                                                                                 | 0.999 | 333.297 | 114.055 | amino acid     | [H]-        | +              | +             | +              |
| 5  | Alanylglycine                                                                             | 0.997 | 357.307 | 145.061 | amino acid     | [H]-        | +              | +             | +              |
| 6  | Pyroglutamic acid                                                                         | 0.995 | 368.001 | 128.034 | amino acid     | [H]-        | +              | +             | +              |
| 7  | L-Glutamic acid                                                                           | 0.993 | 417.911 | 146.045 | amino acid     | [H]-        | +              | +             | +              |
| 8  | L-Asparagine                                                                              | 0.993 | 398.701 | 131.045 | amino acid     | [H]-        | +              | +             | +              |
| 9  | L-Tyrosine                                                                                | 0.989 | 297.037 | 180.059 | amino acid     | [H]-        | +              | +             | +              |
| 10 | L-Arginine                                                                                | 0.986 | 536.431 | 173.103 | amino acid     | [H]-        | +              | +             | +              |
| 11 | D-Alanyl-D-alanine                                                                        | 0.960 | 338.297 | 159.076 | amino acid     | [H]-        | +              | +             | +              |
| 12 | Glycylproline                                                                             | 0.957 | 367.968 | 171.077 | amino acid     | [H]-        | +              | +             | +              |
| 13 | L-Threonine                                                                               | 0.955 | 378.284 | 118.050 | amino acid     | [H]-        | +              | +             | +              |
| 14 | N-Acetylornithine                                                                         | 0.954 | 382.025 | 173.092 | amino acid     | [H]-        | +              | +             | +              |
| 15 | N-Acetyl-L-methionine                                                                     | 0.938 | 224.008 | 190.053 | amino acid     | [H]-        | +              | +             | +              |
| 16 | Phenylalanylproline                                                                       | 0.934 | 260.008 | 261.124 | amino acid     | [H]-        | +              | +             | +              |
| 17 | N-Acetyl-L-phenylalanine                                                                  | 0.931 | 196.430 | 206.081 | amino acid     | [H]-        | +              | +             | +              |
| 18 | N-Acetylglutamic acid                                                                     | 0.894 | 402.633 | 188.061 | amino acid     | [H]-        | +              | +             | +              |
| 19 | N-Alpha-acetyllysine                                                                      | 0.887 | 255.685 | 187.108 | amino acid     | [H]-        | +              | +             | +              |
| 20 | N-Acetylleucine                                                                           | 0.887 | 219.207 | 172.097 | amino acid     | [H]-        | +              | +             | +              |
| 21 | N-Acetyl-L-aspartic acid                                                                  | 0.862 | 413.332 | 174.040 | amino acid     | [H]-        | +              | +             | +              |
| 22 | gamma-Glutamyltyrosine                                                                    | 0.862 | 398.465 | 309.109 | amino acid     | [H]-        | +              | +             | +              |
| 23 | Epsilon-(gamma-Glutamyl)-lysine                                                           | 0.789 | 477.674 | 274.140 | amino acid     | [H]-        | +              | +             | +              |
| 24 | 1-deoxy-1-(N6-lysino)-D-fructose                                                          | 0.759 | 424.806 | 132.029 | amino acid     | [H]-        | +              | +             | +              |
| 25 | L-Homoserine                                                                              | 0.738 | 425.837 | 118.050 | amino acid     | [H]-        | +              | +             | +              |
| 26 | 4,5-Dihydroorotic acid                                                                    | 0.736 | 176.453 | 157.026 | amino acid     | [H]-        | +              | +             | +              |
| 27 | HistidinyI-Serine                                                                         | 0.708 | 392.438 | 241.092 | amino acid     | [H]-        | +              | +             | +              |
| 28 | N2-gamma-Glutamylglutamine                                                                | 0.577 | 435.718 | 274.104 | amino acid     | [H]-        | +              | +             | +              |
| 29 | Glutamylglutamic acid                                                                     | 0.563 | 475.002 | 275.088 | amino acid     | [H]-        | +              | +             | +              |
| 30 | N-methyl-L-glutamic Acid                                                                  | 0.522 | 323.235 | 160.060 | amino acid     | [H]-        | +              | +             | +              |
| 31 | N-Acetylvaline                                                                            | 0.480 | 26.447  | 158.081 | amino acid     | [H]-        | +              | +             | +              |
| 32 | Aspartame                                                                                 | 0.387 | 368.076 | 293.114 | amino acid     | [H]-        | +              | +             | +              |
| 33 | L-Alloisoleucine                                                                          | 1.000 | 709.002 | 132.102 | amino acid     | [H]+        | +              | +             | +              |
| 34 | Protein serine                                                                            | 1.000 | 437.210 | 106.050 | amino acid     | [H]+        | +              | +             | +              |
| 35 | D-Proline                                                                                 | 1.000 | 262.811 | 116.071 | amino acid     | [H]+        | +              | +             | +              |
| 36 | (alpha-D-mannosyl)7-beta-D-mannosyl-diacetylchitobiosyl-L-asparagine, isoform A (protein) | 1.000 | 368.834 | 90.055  | amino acid     | [H]+        | +              | +             | +              |
| 37 | L-Serine                                                                                  | 0.999 | 362.438 | 106.050 | amino acid     | [H]+        | +              | +             | +              |
| 38 | Guanidinosuccinic acid                                                                    | 0.999 | 377.200 | 176.066 | amino acid     | [H]+        | +              | +             | +              |
| 39 | L-Isoleucine                                                                              | 0.999 | 298.181 | 132.102 | amino acid     | [H]+        | +              | +             | +              |

|    |                                    |       |         |         |            |      |   |   |   |
|----|------------------------------------|-------|---------|---------|------------|------|---|---|---|
| 40 | (±)-erythro-Isoleucine             | 0.999 | 432.823 | 132.102 | amino acid | [H]+ | + | + | + |
| 41 | L-Phenylalanine                    | 0.998 | 281.562 | 166.086 | amino acid | [H]+ | + | + | + |
| 42 | Glycitein                          | 0.997 | 114.919 | 285.075 | amino acid | [H]+ | + | + | + |
| 43 | L-Lysine                           | 0.997 | 538.369 | 147.113 | amino acid | [H]+ | + | + | + |
| 44 | D-Serine                           | 0.997 | 317.650 | 106.050 | amino acid | [H]+ | + | + | + |
| 45 | Dihydroxyfumitremorgin C           | 0.997 | 336.644 | 412.184 | amino acid | [H]+ | + | + | + |
| 46 | D-Aspartic acid                    | 0.996 | 424.735 | 134.045 | amino acid | [H]+ | + | + | + |
| 47 | L-Histidine                        | 0.995 | 445.375 | 156.077 | amino acid | [H]+ | + | + | + |
| 48 | Glycyl-Valine                      | 0.995 | 306.947 | 175.108 | amino acid | [H]+ | + | + | + |
| 49 | L-Pipecolic acid                   | 0.993 | 224.347 | 130.083 | amino acid | [H]+ | + | + | + |
| 50 | L-Methionine                       | 0.991 | 335.329 | 150.058 | amino acid | [H]+ | + | + | + |
| 51 | D-Glutamine                        | 0.990 | 395.613 | 147.076 | amino acid | [H]+ | + | + | + |
| 52 | Alanyl-Leucine                     | 0.988 | 253.423 | 203.139 | amino acid | [H]+ | + | + | + |
| 53 | Pyro-L-glutaminy-L-glutamine       | 0.986 | 188.788 | 258.108 | amino acid | [H]+ | + | - | + |
| 54 | 1-Aminocyclopropanecarboxylic acid | 0.985 | 80.902  | 102.055 | amino acid | [H]+ | + | + | + |
| 55 | Lysyl-Tyrosine                     | 0.985 | 245.727 | 310.173 | amino acid | [H]+ | + | + | + |
| 56 | Isoleucyl-Serine                   | 0.984 | 281.566 | 219.133 | amino acid | [H]+ | + | + | + |
| 57 | N-Methyl-α-aminoisobutyric acid    | 0.984 | 236.335 | 118.087 | amino acid | [H]+ | + | + | + |
| 58 | Glycylleucine                      | 0.983 | 305.099 | 189.123 | amino acid | [H]+ | + | + | + |
| 59 | Norvaline                          | 0.980 | 407.905 | 118.087 | amino acid | [H]+ | + | + | + |
| 60 | (±)-Tryptophan                     | 0.969 | 285.086 | 205.097 | amino acid | [H]+ | + | + | + |
| 61 | Glycyl-Serine                      | 0.969 | 365.758 | 163.071 | amino acid | [H]+ | + | + | + |
| 62 | 3-Methylhistidine                  | 0.962 | 404.297 | 170.092 | amino acid | [H]+ | + | + | + |
| 63 | D-Alanine                          | 0.952 | 388.977 | 90.055  | amino acid | [H]+ | + | + | + |
| 64 | Lysyl-Leucine                      | 0.950 | 551.640 | 260.196 | amino acid | [H]+ | + | + | + |
| 65 | L-Targinine                        | 0.947 | 526.117 | 189.134 | amino acid | [H]+ | + | + | + |
| 66 | 4-Amino-2-methylenebutanoic acid   | 0.946 | 101.720 | 116.071 | amino acid | [H]+ | + | + | + |
| 67 | Asymmetric dimethylarginine        | 0.946 | 524.110 | 203.150 | amino acid | [H]+ | + | + | + |
| 68 | Tryptophanamide                    | 0.943 | 71.852  | 204.113 | amino acid | [H]+ | + | + | + |
| 69 | Glycyltyrosine                     | 0.938 | 325.335 | 239.102 | amino acid | [H]+ | + | + | + |
| 70 | Phenylalanyl-Alanine               | 0.936 | 254.240 | 237.123 | amino acid | [H]+ | + | + | + |
| 71 | Prolyl-Threonine                   | 0.934 | 121.174 | 217.118 | amino acid | [H]+ | - | + | - |
| 72 | Leucyl-Tyrosine                    | 0.932 | 231.431 | 295.165 | amino acid | [H]+ | + | + | + |
| 73 | Leucyl-Isoleucine                  | 0.932 | 241.988 | 245.185 | amino acid | [H]+ | + | + | + |
| 74 | N-Ethylglycine                     | 0.925 | 49.979  | 104.071 | amino acid | [H]+ | + | + | + |
| 75 | Racemethionine                     | 0.918 | 219.842 | 150.058 | amino acid | [H]+ | + | + | + |
| 76 | N2-(3-Hydroxysuccinoyl)arginine    | 0.914 | 397.355 | 291.130 | amino acid | [H]+ | + | + | + |
| 77 | Prolyl-Alanine                     | 0.914 | 253.531 | 187.107 | amino acid | [H]+ | + | + | + |
| 78 | Tyrosyl-Methionine                 | 0.911 | 235.000 | 313.121 | amino acid | [H]+ | + | - | - |
| 79 | Leucyl-Aspartate                   | 0.910 | 372.589 | 247.139 | amino acid | [H]+ | + | + | + |
| 80 | N-Carboxyethyl-g-aminobutyric acid | 0.910 | 411.782 | 176.092 | amino acid | [H]+ | + | + | + |
| 81 | Prolylphenylalanine                | 0.909 | 257.011 | 263.139 | amino acid | [H]+ | + | + | + |

|     |                                    |       |         |         |            |      |   |   |   |
|-----|------------------------------------|-------|---------|---------|------------|------|---|---|---|
| 82  | Prolyl-Asparagine                  | 0.907 | 350.807 | 230.113 | amino acid | [H]+ | - | + | + |
| 83  | L-2-Amino-3-methylenehexanoic acid | 0.904 | 304.105 | 144.102 | amino acid | [H]+ | + | + | + |
| 84  | Prolyl-Methionine                  | 0.901 | 241.145 | 247.111 | amino acid | [H]+ | + | + | + |
| 85  | Vinylacetylglycine                 | 0.898 | 321.444 | 144.065 | amino acid | [H]+ | + | + | + |
| 86  | Prolyl-Aspartate                   | 0.897 | 426.260 | 231.097 | amino acid | [H]+ | + | + | + |
| 87  | Aspartyl-Glutamate                 | 0.895 | 476.136 | 263.087 | amino acid | [H]+ | + | + | + |
| 88  | Tyrosyl-Tyrosine                   | 0.893 | 251.489 | 345.144 | amino acid | [H]+ | + | - | + |
| 89  | Prolyl-Valine                      | 0.892 | 230.550 | 215.139 | amino acid | [H]+ | + | + | + |
| 90  | Leucyl-Valine                      | 0.892 | 218.103 | 231.170 | amino acid | [H]+ | + | + | + |
| 91  | L-beta-aspartyl-L-glycine          | 0.891 | 433.244 | 191.066 | amino acid | [H]+ | + | + | + |
| 92  | Glutamylthreonine                  | 0.891 | 426.397 | 249.108 | amino acid | [H]+ | + | + | + |
| 93  | Tyrosyl-Valine                     | 0.890 | 241.157 | 281.149 | amino acid | [H]+ | + | + | + |
| 94  | Arginyl-Leucine                    | 0.888 | 357.614 | 288.203 | amino acid | [H]+ | + | + | + |
| 95  | Prolyl-Serine                      | 0.886 | 320.274 | 203.103 | amino acid | [H]+ | + | + | + |
| 96  | N-Butyrylglycine                   | 0.885 | 44.721  | 146.081 | amino acid | [H]+ | + | + | + |
| 97  | Prolyl-Tyrosine                    | 0.881 | 335.025 | 279.133 | amino acid | [H]+ | - | + | + |
| 98  | Arginyl-Methionine                 | 0.879 | 366.237 | 306.159 | amino acid | [H]+ | - | - | + |
| 99  | Leucyl-Threonine                   | 0.877 | 268.442 | 233.149 | amino acid | [H]+ | + | + | + |
| 100 | Aspartylphenylalanine              | 0.876 | 365.811 | 281.113 | amino acid | [H]+ | + | + | + |
| 101 | Phenylalanyl-Methionine            | 0.871 | 208.384 | 297.126 | amino acid | [H]+ | - | + | + |
| 102 | Glutamylvaline                     | 0.868 | 90.484  | 246.144 | amino acid | [H]+ | + | + | + |
| 103 | Valyl-Aspartate                    | 0.862 | 402.697 | 233.113 | amino acid | [H]+ | + | + | + |
| 104 | Histidyl-Threonine                 | 0.860 | 364.873 | 257.124 | amino acid | [H]+ | + | + | + |
| 105 | Valyl-Valine                       | 0.855 | 235.029 | 217.155 | amino acid | [H]+ | + | + | + |
| 106 | N-a-Acetyl-L-arginine              | 0.853 | 392.121 | 217.129 | amino acid | [H]+ | + | + | + |
| 107 | beta-Alanine                       | 0.852 | 53.363  | 90.055  | amino acid | [H]+ | + | + | + |
| 108 | Arginyl-Gamma-glutamate            | 0.845 | 461.563 | 303.177 | amino acid | [H]+ | + | + | + |
| 109 | Phenylalanyl-Threonine             | 0.845 | 234.136 | 267.134 | amino acid | [H]+ | - | + | + |
| 110 | Prolyl-Glutamine                   | 0.845 | 367.518 | 244.129 | amino acid | [H]+ | + | + | + |
| 111 | 5-Hydroxy-L-tryptophan             | 0.842 | 519.365 | 221.092 | amino acid | [H]+ | + | + | + |
| 112 | Histidinal                         | 0.836 | 152.336 | 140.082 | amino acid | [H]+ | + | + | + |
| 113 | Isoleucyl-Alanine                  | 0.827 | 237.695 | 203.139 | amino acid | [H]+ | + | + | + |
| 114 | Prolyl-Tryptophan                  | 0.824 | 270.408 | 302.150 | amino acid | [H]+ | + | + | + |
| 115 | Tyrosyl-Asparagine                 | 0.824 | 328.730 | 296.123 | amino acid | [H]+ | + | - | + |
| 116 | Isoleucyl-Threonine                | 0.823 | 255.244 | 233.149 | amino acid | [H]+ | + | + | + |
| 117 | Tyrosyl-Serine                     | 0.822 | 308.249 | 269.112 | amino acid | [H]+ | + | - | + |
| 118 | Tyrosyl-Threonine                  | 0.820 | 281.561 | 283.128 | amino acid | [H]+ | + | + | + |
| 119 | Tryptophyl-Tyrosine                | 0.817 | 430.260 | 368.156 | amino acid | [H]+ | - | - | + |
| 120 | L-Cyclo(alanylglycyl)              | 0.816 | 313.192 | 129.066 | amino acid | [H]+ | + | + | + |
| 121 | Tryptophyl-Arginine                | 0.815 | 364.096 | 361.198 | amino acid | [H]+ | + | + | + |
| 122 | gamma-Glutamylalanine              | 0.814 | 428.123 | 219.097 | amino acid | [H]+ | + | + | + |
| 123 | Pyrroline hydroxycarboxylic acid   | 0.809 | 80.962  | 130.050 | amino acid | [H]+ | + | + | + |
| 124 | Prolylglycine                      | 0.809 | 331.949 | 173.092 | amino acid | [H]+ | + | + | + |

|     |                                                               |       |         |         |            |      |   |   |   |
|-----|---------------------------------------------------------------|-------|---------|---------|------------|------|---|---|---|
| 125 | L-prolyl-L-proline                                            | 0.800 | 333.450 | 213.123 | amino acid | [H]+ | + | + | + |
| 126 | Isoleucyl-Methionine                                          | 0.799 | 213.612 | 263.142 | amino acid | [H]+ | + | + | + |
| 127 | gamma-Glutamylleucine                                         | 0.798 | 337.135 | 261.144 | amino acid | [H]+ | - | - | + |
| 128 | HistidinyI-Aspartate                                          | 0.798 | 436.686 | 271.103 | amino acid | [H]+ | + | + | + |
| 129 | Alanyl-Proline                                                | 0.798 | 313.133 | 187.107 | amino acid | [H]+ | + | + | + |
| 130 | ArginyI-Tyrosine                                              | 0.796 | 424.666 | 338.181 | amino acid | [H]+ | + | + | + |
| 131 | N-Acetyl-L-glutamate<br>5-semialdehyde                        | 0.793 | 394.414 | 174.076 | amino acid | [H]+ | + | + | + |
| 132 | ArginyI-Phenylalanine                                         | 0.791 | 362.105 | 322.187 | amino acid | [H]+ | + | + | + |
| 133 | Prolylhydroxyproline                                          | 0.790 | 306.003 | 229.118 | amino acid | [H]+ | - | - | + |
| 134 | HistidinyI-Leucine                                            | 0.789 | 316.622 | 269.161 | amino acid | [H]+ | + | + | + |
| 135 | L-2-Amino-5-hydroxypentanoic<br>acid                          | 0.788 | 353.926 | 134.081 | amino acid | [H]+ | + | + | + |
| 136 | Valyl-Threonine                                               | 0.781 | 242.901 | 219.134 | amino acid | [H]+ | + | + | + |
| 137 | Tyrosine methylester                                          | 0.775 | 65.219  | 196.097 | amino acid | [H]+ | + | + | + |
| 138 | HistidinyI-Phenylalanine                                      | 0.773 | 300.749 | 303.144 | amino acid | [H]+ | + | + | + |
| 139 | Alanyl-Arginine                                               | 0.769 | 438.131 | 246.156 | amino acid | [H]+ | + | + | + |
| 140 | HistidinyI-Lysine                                             | 0.769 | 517.942 | 284.171 | amino acid | [H]+ | + | + | + |
| 141 | Tyrosyl-Tryptophan                                            | 0.768 | 229.660 | 368.160 | amino acid | [H]+ | + | + | + |
| 142 | Hydroxyprolyl-Valine                                          | 0.768 | 124.666 | 231.134 | amino acid | [H]+ | - | + | + |
| 143 | Lysyl-Valine                                                  | 0.766 | 552.461 | 246.181 | amino acid | [H]+ | + | + | + |
| 144 | HistidinyI-Methionine                                         | 0.765 | 323.480 | 287.117 | amino acid | [H]+ | + | + | + |
| 145 | Phenylalanyl-Glycine                                          | 0.761 | 255.272 | 223.108 | amino acid | [H]+ | + | + | + |
| 146 | Methionyl-Threonine                                           | 0.752 | 276.324 | 251.106 | amino acid | [H]+ | + | + | + |
| 147 | N6-Acetyl-L-lysine                                            | 0.750 | 371.344 | 189.123 | amino acid | [H]+ | + | + | + |
| 148 | Lysinoalanine                                                 | 0.747 | 473.379 | 234.144 | amino acid | [H]+ | + | + | + |
| 149 | N-[[3-Hydroxy-2-(2-pentenyl)cycl<br>opentyl]acetyl]isoleucine | 0.747 | 141.468 | 326.232 | amino acid | [H]+ | - | + | - |
| 150 | (3xi,6xi)-Cyclo(alanylvalyl)                                  | 0.746 | 303.026 | 171.112 | amino acid | [H]+ | + | + | + |
| 151 | Argininosuccinic acid                                         | 0.744 | 488.595 | 291.130 | amino acid | [H]+ | + | + | + |
| 152 | HistidinyI-Glutamine                                          | 0.737 | 389.432 | 284.135 | amino acid | [H]+ | + | + | + |
| 153 | HistidinyI-Valine                                             | 0.729 | 333.108 | 255.144 | amino acid | [H]+ | + | + | + |
| 154 | HistidinyI-Proline                                            | 0.729 | 361.362 | 253.129 | amino acid | [H]+ | + | + | + |
| 155 | Tyrosyl-Alanine                                               | 0.729 | 268.206 | 253.118 | amino acid | [H]+ | + | + | + |
| 156 | Alanyl-Isoleucine                                             | 0.723 | 51.957  | 203.139 | amino acid | [H]+ | + | + | + |
| 157 | HistidinyI-Asparagine                                         | 0.716 | 394.785 | 270.119 | amino acid | [H]+ | + | + | + |
| 158 | Phenylalanyl-Gamma-glutamate                                  | 0.710 | 283.277 | 294.145 | amino acid | [H]+ | + | + | + |
| 159 | Tyrosyl-Glutamine                                             | 0.709 | 86.130  | 310.139 | amino acid | [H]+ | + | + | + |
| 160 | Tyrosyl-Phenylalanine                                         | 0.707 | 215.498 | 329.149 | amino acid | [H]+ | + | + | + |
| 161 | Lysyl-Arginine                                                | 0.706 | 582.406 | 303.214 | amino acid | [H]+ | + | + | + |
| 162 | AsparaginyI-Arginine                                          | 0.704 | 472.179 | 289.161 | amino acid | [H]+ | - | + | + |
| 163 | N5-Acetyl-N2-gamma-L-glutamyl-<br>L-ornithine                 | 0.697 | 517.126 | 304.150 | amino acid | [H]+ | + | + | + |
| 164 | 5-Hydroxylysine                                               | 0.688 | 529.599 | 163.107 | amino acid | [H]+ | + | + | + |

|     |                                                            |       |         |         |            |      |   |   |   |
|-----|------------------------------------------------------------|-------|---------|---------|------------|------|---|---|---|
| 165 | Prolyl-Lysine                                              | 0.684 | 451.971 | 244.165 | amino acid | [H]+ | + | + | + |
| 166 | Gamma-glutamyl-L-putrescine                                | 0.681 | 456.022 | 218.150 | amino acid | [H]+ | + | + | + |
| 167 | Glutaminyllysine                                           | 0.680 | 471.215 | 275.171 | amino acid | [H]+ | + | + | + |
| 168 | Arginyl-Serine                                             | 0.673 | 443.955 | 262.150 | amino acid | [H]+ | + | + | + |
| 169 | Serylvaline                                                | 0.669 | 312.313 | 205.118 | amino acid | [H]+ | + | + | + |
| 170 | Valyl-Asparagine                                           | 0.669 | 331.395 | 232.129 | amino acid | [H]+ | + | + | + |
| 171 | Aspartyl-Arginine                                          | 0.667 | 469.880 | 290.145 | amino acid | [H]+ | + | + | + |
| 172 | Leucyl-Asparagine                                          | 0.665 | 324.391 | 246.144 | amino acid | [H]+ | + | + | + |
| 173 | Seriny-Gamma-glutamate                                     | 0.664 | 366.677 | 234.108 | amino acid | [H]+ | + | + | + |
| 174 | Glutamyllysine                                             | 0.663 | 320.189 | 276.155 | amino acid | [H]+ | + | + | + |
| 175 | Glutamylphenylalanine                                      | 0.660 | 367.796 | 295.129 | amino acid | [H]+ | + | + | + |
| 176 | L-Cystine                                                  | 0.655 | 453.512 | 241.030 | amino acid | [H]+ | + | + | + |
| 177 | Tryptophyl-Asparagine                                      | 0.654 | 327.090 | 319.140 | amino acid | [H]+ | + | + | + |
| 178 | Isoleucyl-Tryptophan                                       | 0.643 | 210.846 | 318.181 | amino acid | [H]+ | + | + | + |
| 179 | Glutamylserine                                             | 0.641 | 384.984 | 234.108 | amino acid | [H]+ | + | + | + |
| 180 | Lysyl-Hydroxyproline                                       | 0.637 | 485.719 | 260.160 | amino acid | [H]+ | - | + | - |
| 181 | Serylaspartic acid                                         | 0.636 | 437.833 | 221.076 | amino acid | [H]+ | + | + | + |
| 182 | Tyrosyl-Aspartate                                          | 0.636 | 392.509 | 297.108 | amino acid | [H]+ | + | + | + |
| 183 | Cysteinyl-Proline                                          | 0.632 | 235.104 | 219.079 | amino acid | [H]+ | + | + | + |
| 184 | Citrulline                                                 | 0.624 | 385.987 | 176.107 | amino acid | [H]+ | + | + | + |
| 185 | Lysyl-Glycine                                              | 0.622 | 477.962 | 204.134 | amino acid | [H]+ | + | + | + |
| 186 | 2-Methylbutyrylglycine                                     | 0.620 | 325.262 | 160.097 | amino acid | [H]+ | + | + | + |
| 187 | Isoleucyl-Gamma-glutamate                                  | 0.618 | 283.301 | 260.160 | amino acid | [H]+ | + | + | - |
| 188 | Serylserine                                                | 0.618 | 373.368 | 193.082 | amino acid | [H]+ | + | + | + |
| 189 | Hydroxyphenylacetyl glycine                                | 0.615 | 131.551 | 210.076 | amino acid | [H]+ | + | + | + |
| 190 | Aspartyl-Alanine                                           | 0.613 | 421.136 | 205.082 | amino acid | [H]+ | + | + | + |
| 191 | Aspartyl-Leucine                                           | 0.610 | 448.712 | 247.129 | amino acid | [H]+ | + | + | + |
| 192 | Lysyl-Alanine                                              | 0.610 | 514.826 | 218.150 | amino acid | [H]+ | + | - | + |
| 193 | gamma-Glutamylvaline                                       | 0.607 | 396.464 | 247.129 | amino acid | [H]+ | + | + | + |
| 194 | N-(4,5-Dihydro-1-methyl-4-oxo-1<br>H-imidazol-2-yl)alanine | 0.604 | 136.512 | 186.087 | amino acid | [H]+ | + | + | + |
| 195 | 5-Aminopentanamide                                         | 0.604 | 81.602  | 117.102 | amino acid | [H]+ | + | + | + |
| 196 | Alanyl-Valine                                              | 0.949 | 221.795 | 189.127 | amino acid | [H]+ | + | + | + |
| 197 | Leucyl-Tyrosine                                            | 0.932 | 231.431 | 295.165 | amino acid | [H]+ | - | + | + |
| 198 | gamma-Glutamylglutamic acid                                | 0.586 | 474.535 | 277.103 | amino acid | [H]+ | - | + | + |
| 199 | Tryptophyl-Methionine                                      | 0.578 | 219.271 | 336.137 | amino acid | [H]+ | + | + | + |
| 200 | Tyrosyl-Gamma-glutamate                                    | 0.590 | 320.991 | 310.139 | amino acid | [H]+ | - | + | + |
| 201 | Valyl-Tryptophan                                           | 0.571 | 217.277 | 304.165 | amino acid | [H]+ | - | + | + |
| 202 | Tryptophyl-Tryptophan                                      | 0.550 | 211.644 | 391.175 | amino acid | [H]+ | + | + | + |
| 203 | Threoninyl-Serine                                          | 0.585 | 409.705 | 207.101 | amino acid | [H]+ | + | - | + |
| 204 | Methionyl-Valine                                           | 0.528 | 226.046 | 249.126 | amino acid | [H]+ | + | + | - |
| 205 | Serylasparagine                                            | 0.491 | 377.862 | 220.105 | amino acid | [H]+ | + | + | + |
| 206 | Gamma-Aminobutyryl-lysine                                  | 0.402 | 99.530  | 232.165 | amino acid | [H]+ | + | + | + |
| 207 | Prolyl-Gamma-glutamate                                     | 0.579 | 448.928 | 244.140 | amino acid | [H]+ | + | + | + |

|     |                                 |       |         |         |              |      |   |   |   |
|-----|---------------------------------|-------|---------|---------|--------------|------|---|---|---|
| 208 | L-Tryptophan                    | 0.526 | 74.867  | 203.082 | amino acid   | [H]+ | + | + | + |
| 209 | Lysyl-Methionine                | 0.580 | 403.764 | 278.153 | amino acid   | [H]+ | + | + | + |
| 210 | 3-Furoic acid                   | 0.998 | 372.607 | 111.008 | organic acid | [H]- | + | + | + |
| 211 | Fumaric acid                    | 0.998 | 247.122 | 115.002 | organic acid | [H]- | + | + | + |
| 212 | O-Phosphoethanolamine           | 0.998 | 489.014 | 140.011 | organic acid | [H]- | + | + | + |
| 213 | L-Malic acid                    | 0.997 | 447.202 | 133.013 | organic acid | [H]- | + | + | + |
| 214 | D-Malic acid                    | 0.994 | 592.064 | 133.013 | organic acid | [H]- | + | + | + |
| 215 | Ketoleucine                     | 0.993 | 58.181  | 129.055 | organic acid | [H]- | + | + | + |
| 216 | Citric acid                     | 0.992 | 463.459 | 191.019 | organic acid | [H]- | + | + | + |
| 217 | Alpha-dimorphecolic acid        | 0.985 | 98.323  | 295.227 | organic acid | [H]- | + | + | + |
| 218 | Succinic acid                   | 0.984 | 314.756 | 117.018 | organic acid | [H]- | + | + | + |
| 219 | L-2-Hydroxyglutaric acid        | 0.981 | 255.465 | 147.029 | organic acid | [H]- | + | + | + |
| 220 | 4-Dodecylbenzenesulfonic Acid   | 0.979 | 28.382  | 325.184 | organic acid | [H]- | + | + | + |
| 221 | 3-Hydroxybenzoic acid           | 0.976 | 47.066  | 137.023 | organic acid | [H]- | + | + | + |
| 222 | Taurine                         | 0.975 | 317.991 | 124.006 | organic acid | [H]- | + | + | + |
| 223 | cis-Aconitic acid               | 0.971 | 455.433 | 173.008 | organic acid | [H]- | + | + | + |
| 224 | 3,4-Dihydroxybenzeneacetic acid | 0.970 | 51.182  | 167.034 | organic acid | [H]- | + | + | + |
| 225 | (2R,3S)-Piscidic acid           | 0.957 | 470.630 | 255.051 | organic acid | [H]- | + | + | + |
| 226 | Cyclohexanecarboxylic acid      | 0.950 | 44.242  | 127.075 | organic acid | [H]- | + | + | + |
| 227 | 4-Methylbenzoic acid            | 0.924 | 382.998 | 135.044 | organic acid | [H]- | + | + | + |
| 228 | Succinylacetone                 | 0.876 | 65.542  | 157.050 | organic acid | [H]- | + | + | + |
| 229 | Isocitric acid                  | 0.874 | 516.716 | 173.008 | organic acid | [H]- | + | + | + |
| 230 | Methylmalonic acid              | 0.845 | 221.658 | 117.018 | organic acid | [H]- | + | + | + |

|     |                             |       |         |         |              |      |   |   |   |
|-----|-----------------------------|-------|---------|---------|--------------|------|---|---|---|
| 231 | Malonic acid                | 0.817 | 392.763 | 103.002 | organic acid | [H]- | + | + | + |
| 232 | p-Anisic acid               | 0.759 | 45.356  | 151.039 | organic acid | [H]- | + | + | + |
| 233 | 3,4-Dimethylbenzoic acid    | 0.752 | 216.497 | 149.060 | organic acid | [H]- | + | + | + |
| 234 | Terephthalic acid           | 0.710 | 61.949  | 165.022 | organic acid | [H]- | + | - | + |
| 235 | 2-Methylhippuric acid       | 0.567 | 214.682 | 192.066 | organic acid | [H]- | + | - | - |
| 236 | Salicin                     | 0.491 | 237.053 | 271.051 | organic acid | [H]- | + | + | + |
| 237 | Methyl acrylate             | 0.991 | 395.225 | 87.045  | organic acid | [H]+ | + | + | + |
| 238 | 4-Guanidinobutanoic acid    | 0.975 | 380.907 | 146.092 | organic acid | [H]+ | + | + | + |
| 239 | N-(2-Methylpropyl)acetamide | 0.811 | 194.245 | 116.107 | organic acid | [H]+ | + | + | + |
| 240 | Humulinic acid A            | 0.613 | 76.648  | 267.158 | organic acid | [H]+ | - | + | - |
| 241 | Maleic acid                 | 0.998 | 276.781 | 115.002 | vitamins     | [H]- | + | + | + |
| 242 | Nicotinic acid              | 0.711 | 239.168 | 122.024 | vitamins     | [H]- | + | + | + |
| 243 | 4-Pyridoxic acid            | 0.901 | 46.754  | 182.045 | vitamins     | [H]- | + | + | + |
| 244 | Riboflavin                  | 0.811 | 237.357 | 377.145 | vitamins     | [H]+ | + | + | + |
| 245 | 24,25-Dihydroxyvitamin D    | 0.638 | 31.617  | 417.336 | vitamins     | [H]+ | + | + | + |
| 246 | Nicotinamide riboside       | 0.884 | 394.273 | 253.080 | vitamins     | [H]- | + | + | + |
| 247 | Pyridoxine                  | 0.966 | 101.418 | 168.066 | vitamins     | [H]- | + | + | + |
| 248 | Isonicotinic acid           | 1.000 | 233.271 | 124.039 | vitamins     | [H]+ | + | + | + |
| 249 | Indole-3-carboxylic acid    | 0.957 | 78.009  | 160.039 | alkaloids    | [H]- | + | + | + |
| 250 | Allantoin                   | 0.956 | 204.418 | 157.036 | alkaloids    | [H]- | + | + | + |
| 251 | Imidazoleacetic acid        | 0.894 | 95.257  | 125.034 | alkaloids    | [H]- | + | + | + |
| 252 | Urocanic acid               | 0.846 | 199.299 | 137.034 | alkaloids    | [H]- | + | + | + |
| 253 | Protoporphyrin IX           | 0.776 | 309.273 | 561.254 | alkaloids    | [H]- | + | + | + |
| 254 | 1,3,7-Trimethyluric acid    | 0.434 | 362.454 | 209.066 | alkaloids    | [H]- | + | + | + |
| 255 | Hypoxanthine                | 1.000 | 236.753 | 137.046 | alkaloids    | [H]+ | + | + | + |
| 256 | Betaine                     | 0.999 | 293.780 | 118.086 | alkaloids    | [H]+ | + | + | + |
| 257 | 3-Isoxazolidinone           | 0.999 | 397.408 | 88.040  | alkaloids    | [H]+ | + | + | + |
| 258 | Quinoline                   | 0.998 | 51.105  | 130.065 | alkaloids    | [H]+ | + | + | + |
| 259 | Trigonelline                | 0.995 | 306.699 | 138.055 | alkaloids    | [H]+ | + | + | + |
| 260 | Piperidine                  | 0.995 | 297.070 | 86.097  | alkaloids    | [H]+ | + | + | + |
| 261 | Xanthine                    | 0.989 | 330.978 | 153.040 | alkaloids    | [H]+ | + | + | + |
| 262 | Ethyl 2-aminobenzoate       | 0.953 | 194.577 | 166.086 | alkaloids    | [H]+ | + | + | + |
| 263 | Fagomine                    | 0.891 | 321.161 | 148.097 | alkaloids    | [H]+ | + | + | + |
| 264 | Indole                      | 0.846 | 281.567 | 118.065 | alkaloids    | [H]+ | + | + | + |



|     |                                    |       |         |         |                        |      |   |   |   |
|-----|------------------------------------|-------|---------|---------|------------------------|------|---|---|---|
| 265 | 4-Hydroxy-1H-indole-3-acetonitrile | 0.739 | 51.703  | 173.071 | alkaloids              | [H]+ | + | + | + |
| 266 | Alkaloid A6                        | 0.700 | 476.159 | 342.090 | alkaloids              | [H]+ | + | + | + |
| 267 | N-Methylcalystegine B2             | 0.671 | 414.100 | 190.107 | alkaloids              | [H]+ | + | + | + |
| 268 | Sphinganine                        | 0.653 | 59.901  | 302.305 | alkaloids              | [H]+ | + | + | + |
| 269 | Nicotine                           | 0.906 | 69.482  | 163.123 | alkaloids              | [H]+ | + | - | + |
| 270 | Uracil                             | 0.999 | 174.020 | 111.019 | Nucleotides            | [H]- | + | + | + |
| 271 | Thymidine                          | 0.989 | 93.249  | 241.082 | Nucleotides            | [H]- | + | + | + |
| 272 | Cytidine                           | 0.985 | 261.061 | 242.078 | Nucleosides            | [H]- | + | + | + |
| 273 | Uridine                            | 0.982 | 173.992 | 243.062 | Nucleosides            | [H]- | + | + | + |
| 274 | Xanthosine                         | 0.973 | 332.100 | 283.068 | Nucleosides            | [H]- | + | + | + |
| 275 | Pseudouridine                      | 0.895 | 263.589 | 243.062 | Nucleosides            | [H]- | + | + | + |
| 276 | Deoxyinosine                       | 0.999 | 197.117 | 253.093 | Nucleosides            | [H]+ | + | + | + |
| 277 | Ribitol                            | 0.854 | 248.984 | 151.060 | Nucleosides            | [H]- | + | + | + |
| 278 | Cytidine monophosphate             | 0.780 | 478.187 | 322.044 | Nucleosides            | [H]- | + | + | + |
| 279 | Uridine 5'-monophosphate           | 0.670 | 435.925 | 323.028 | Nucleosides            | [H]- | + | + | + |
| 280 | Deoxyribose 5-phosphate            | 0.654 | 185.486 | 213.016 | Nucleosides            | [H]- | + | + | + |
| 281 | N4-Acetylcytidine                  | 0.623 | 181.203 | 284.089 | Nucleosides            | [H]- | + | - | + |
| 282 | Adenosine monophosphate            | 0.547 | 450.372 | 346.056 | Nucleotides            | [H]- | + | + | + |
| 283 | Ribothymidine                      | 0.915 | 151.189 | 257.077 | Nucleotide derivatives | [H]- | + | + | + |
| 284 | Cytosine                           | 1.000 | 215.434 | 112.051 | Nucleotides            | [H]+ | + | + | + |
| 285 | Cytarabine                         | 1.000 | 260.517 | 244.093 | Nucleosides            | [H]+ | + | + | + |
| 286 | Inosine                            | 0.999 | 237.500 | 269.087 | Nucleosides            | [H]+ | + | + | + |
| 287 | Nicotinic acid mononucleotide      | 0.998 | 359.496 | 256.081 | Nucleotides            | [H]+ | + | + | + |
| 288 | Guanosine                          | 0.995 | 285.853 | 284.099 | Nucleosides            | [H]+ | + | + | + |
| 289 | Adenosine                          | 0.992 | 235.061 | 268.103 | Nucleosides            | [H]+ | + | + | + |
| 290 | 2-Methylguanosine                  | 0.990 | 216.393 | 298.114 | Nucleosides            | [H]+ | + | + | + |
| 291 | 5-Methylcytidine                   | 0.989 | 248.189 | 258.108 | Nucleoside             | [H]+ | + | - | + |

|     |                                            |       |         |         |                           |      |   |   |   |
|-----|--------------------------------------------|-------|---------|---------|---------------------------|------|---|---|---|
|     |                                            |       |         |         | s                         |      |   |   |   |
| 292 | Deoxyadenosine                             | 0.989 | 149.922 | 252.109 | Nucleoside<br>s           | [H]+ | + | + | + |
| 293 | 5'-Methylthioadenosine                     | 0.975 | 93.396  | 298.096 | Nucleoside<br>s           | [H]+ | + | + | + |
| 294 | Guanosine monophosphate                    | 0.958 | 479.913 | 364.065 | Nucleoside<br>s           | [H]+ | + | + | + |
| 295 | Pyrimidine                                 | 0.939 | 119.976 | 81.045  | Nucleotides               | [H]+ | + | + | + |
| 296 | Citicoline                                 | 0.849 | 462.516 | 489.115 | Nucleotide<br>derivatives | [H]+ | + | + | + |
| 297 | 2-O-Methylcytosine                         | 0.746 | 168.827 | 126.066 | Nucleotides               | [H]+ | + | + | + |
| 298 | Dihydrouracil                              | 0.831 | 60.773  | 115.050 | Nucleotides               | [H]+ | + | + | + |
| 299 | Deoxyguanosine                             | 0.996 | 185.191 | 268.103 | Nucleoside<br>s           | [H]+ | + | + | + |
| 300 | 3-Methyluridine                            | 0.602 | 474.198 | 259.092 | Nucleoside<br>s           | [H]+ | + | + | + |
| 301 | Uridine<br>diphosphate-N-acetylglucosamine | 0.659 | 450.830 | 606.073 | Nucleoside<br>s           | [H]- | + | + | + |
| 302 | 1-Methyladenosine                          | 0.987 | 132.484 | 282.120 | Nucleoside<br>s           | [H]+ | + | + | + |
| 303 | 1-Methylhypoxanthine                       | 0.968 | 155.391 | 151.061 | Nucleotides               | [H]+ | + | + | + |
| 304 | Adenosine 2'-phosphate                     | 0.964 | 428.737 | 348.070 | Nucleoside<br>s           | [H]+ | + | + | + |
| 305 | 7-Methyladenine                            | 0.961 | 258.682 | 150.077 | Nucleotides               | [H]+ | + | + | + |
| 306 | FAPy-adenine                               | 0.951 | 188.880 | 154.072 | Nucleotides               | [H]+ | + | + | + |
| 307 | Dihydrouracil                              | 0.998 | 358.269 | 113.034 | Nucleotides               | [H]- | + | + | + |
| 308 | 3'-AMP                                     | 0.861 | 428.259 | 346.056 | Nucleoside<br>s           | [H]- | - | + | + |
| 309 | Niazirinin                                 | 0.782 | 195.480 | 322.128 | Nucleotides               | [H]+ | + | + | + |
| 310 | Thymine                                    | 0.918 | 94.277  | 127.050 | Nucleotides               | [H]+ | + | - | - |
| 311 | 2'-O-Methyladenosine                       | 0.997 | 99.726  | 282.120 | Nucleoside<br>s           | [H]+ | + | + | + |
| 312 | Cytidine 2'-phosphate                      | 0.997 | 456.936 | 324.059 | Nucleoside<br>s           | [H]+ | + | + | + |
| 313 | Adenine                                    | 1.000 | 174.493 | 136.062 | Nucleotides               | [H]+ | + | + | + |
| 314 | 5-Methylcytosine                           | 0.991 | 248.238 | 126.066 | Nucleotides               | [H]+ | + | + | + |
| 315 | Guanine                                    | 0.998 | 285.853 | 152.057 | Nucleotides               | [H]+ | + | + | + |
| 316 | 1-Methylguanine                            | 0.481 | 205.999 | 166.072 | Nucleoside<br>s           | [H]+ | + | + | + |
| 317 | 5-Aminoimidazole ribonucleotide            | 0.498 | 407.904 | 296.066 | Nucleotides               | [H]+ | + | + | + |
| 318 | Astragalin                                 | 0.942 | 211.231 | 447.093 | triterpenoid<br>saponins  | [H]- | + | + | + |
| 319 | Abscisic acid                              | 0.849 | 83.314  | 263.128 | Sesquiterpe<br>nes        | [H]- | + | + | + |

|     |                       |       |         |         |                       |      |   |   |   |
|-----|-----------------------|-------|---------|---------|-----------------------|------|---|---|---|
| 320 | Geranylgeranyl-PP     | 0.790 | 242.200 | 449.186 | Terpenes              | [H]- | - | + | - |
| 321 | Ginkgolide J          | 0.537 | 493.305 | 423.125 | terpenoid<br>lactone  | [H]- | - | + | - |
| 322 | Bilobalide A          | 0.998 | 362.203 | 327.106 | Terpenes              | [H]+ | + | + | + |
| 323 | Crispanone            | 0.996 | 62.059  | 335.219 | Sesquiterpe<br>nes    | [H]+ | + | - | - |
| 324 | primeveroside         | 0.975 | 89.880  | 423.223 | Terpenes              | [H]+ | + | + | + |
| 325 | Cynaroside A          | 0.971 | 207.499 | 445.203 | Terpenes              | [H]+ | + | + | + |
| 326 | Isopetasoside         | 0.943 | 354.139 | 397.219 | Terpenes              | [H]+ | - | - | + |
| 327 | Pyrophaeophorbide     | 0.942 | 80.339  | 535.269 | Terpenes              | [H]+ | + | + | + |
| 328 | Solavetivone          | 0.925 | 33.335  | 219.174 | Sesquiterpe<br>nes    | [H]+ | + | + | + |
| 329 | Licoagroside B        | 0.892 | 331.963 | 433.133 | Terpenes              | [H]+ | + | + | + |
| 330 | Glycyrrhetic acid     | 0.853 | 37.902  | 471.347 | Terpenes              | [H]+ | - | + | + |
| 331 | Dehydrovomifoliol     | 0.832 | 81.650  | 223.133 | Sesquiterpe<br>nes    | [H]+ | + | + | + |
| 332 | S-Furanopetasitin     | 0.795 | 495.262 | 433.203 | Terpenes              | [H]+ | + | + | + |
| 333 | Perilloside C         | 0.794 | 441.392 | 317.193 | Terpenes              | [H]+ | + | + | + |
| 334 | Cincassiol B          | 0.790 | 467.880 | 401.214 | Terpenes              | [H]+ | + | + | + |
| 335 | Soyasaponin A3        | 0.776 | 313.033 | 959.521 | Terpenes              | [H]+ | + | + | + |
| 336 | Ganoderic acid Mi     | 0.761 | 33.248  | 545.384 | Terpenes              | [H]+ | + | + | + |
| 337 | Citroside A           | 0.744 | 221.798 | 387.200 | Terpene<br>glycosides | [H]+ | + | + | + |
| 338 | Sonchuionoside C      | 0.737 | 452.704 | 387.198 | Terpenes              | [H]+ | - | + | + |
| 339 | Cinnassiol C3         | 0.728 | 420.665 | 383.203 | Terpenes              | [H]+ | + | + | + |
| 340 | Ganoderal A           | 0.720 | 34.374  | 437.341 | Terpenes              | [H]+ | + | + | + |
| 341 | Gerberinol            | 0.582 | 190.484 | 365.102 | Terpenes              | [H]+ | + | + | + |
| 342 | Jujubasaponin IV      | 0.352 | 306.007 | 943.524 | Terpenes              | [H]+ | + | + | + |
| 343 | Jujubasaponin VI      | 0.393 | 270.451 | 797.468 | Terpenes              | [H]+ | + | + | + |
| 344 | Sandosaponin B        | 0.343 | 317.124 | 957.506 | Terpenes              | [H]+ | + | - | + |
| 345 | Pisumsaponin II       | 0.470 | 300.376 | 941.511 | Terpenes              | [H]+ | + | + | + |
| 346 | L-Arabitol            | 0.993 | 97.798  | 151.060 | carbohydrat<br>e      | [H]- | + | + | + |
| 347 | L-Iditol              | 0.954 | 309.838 | 181.071 | carbohydrat<br>e      | [H]- | + | + | + |
| 348 | Trehalose             | 0.950 | 467.231 | 341.108 | carbohydrat<br>e      | [H]- | + | + | + |
| 349 | Beta-D-Galactose      | 0.922 | 259.088 | 179.055 | carbohydrat<br>e      | [H]- | + | + | + |
| 350 | Threonic acid         | 0.915 | 334.521 | 135.029 | carbohydrat<br>e      | [H]- | + | + | + |
| 351 | Gluconic acid         | 0.913 | 396.520 | 195.050 | carbohydrat<br>e      | [H]- | + | + | + |
| 352 | Galactose 1-phosphate | 0.901 | 496.233 | 259.022 | carbohydrat           | [H]- | + | - | + |

|     |                                  |       |         |         |              |      |   |   |   |
|-----|----------------------------------|-------|---------|---------|--------------|------|---|---|---|
|     |                                  |       |         |         | e            |      |   |   |   |
| 353 | Stachyose                        | 0.901 | 517.852 | 665.215 | carbohydrate | [H]- | + | + | + |
| 354 | Galactinol                       | 0.889 | 414.329 | 341.108 | carbohydrate | [H]- | + | + | + |
| 355 | D-Xylitol                        | 0.867 | 274.917 | 151.060 | carbohydrate | [H]- | + | + | + |
| 356 | Galactaric acid                  | 0.858 | 472.398 | 209.030 | carbohydrate | [H]- | + | + | + |
| 357 | L-Gulonolactone                  | 0.830 | 313.432 | 177.039 | carbohydrate | [H]- | + | + | + |
| 358 | Rhamnose                         | 0.782 | 151.216 | 163.060 | carbohydrate | [H]- | + | + | + |
| 359 | D-Xylose                         | 0.780 | 314.593 | 149.044 | carbohydrate | [H]- | + | + | + |
| 360 | Melezitose                       | 0.729 | 667.088 | 503.162 | carbohydrate | [H]- | + | + | + |
| 361 | Maltopentaose                    | 0.726 | 533.553 | 827.267 | carbohydrate | [H]- | + | + | + |
| 362 | Maltotetraose                    | 0.674 | 661.442 | 665.216 | carbohydrate | [H]- | + | + | + |
| 363 | Gluconolactone                   | 0.653 | 123.320 | 177.039 | carbohydrate | [H]- | + | + | + |
| 364 | Trehalose 6-phosphate            | 0.627 | 497.112 | 421.075 | carbohydrate | [H]- | + | + | + |
| 365 | N-Acetyl-glucosamine 1-phosphate | 0.594 | 464.383 | 300.049 | carbohydrate | [H]- | + | + | + |
| 366 | Levoglucozan                     | 0.579 | 223.414 | 161.045 | carbohydrate | [H]- | + | + | + |
| 367 | Phenol glucuronide               | 0.575 | 363.127 | 269.066 | carbohydrate | [H]- | + | + | + |
| 368 | Steviobioside                    | 0.561 | 400.475 | 641.314 | carbohydrate | [H]- | - | - | + |
| 369 | Ethyl glucuronide                | 0.560 | 469.649 | 221.066 | carbohydrate | [H]- | + | + | + |
| 370 | N-Acetyl-D-glucosamine           | 0.500 | 4.597   | 220.082 | carbohydrate | [H]- | + | + | + |
| 371 | L-Erythrulose                    | 0.926 | 201.883 | 119.034 | carbohydrate | [H]- | + | + | + |
| 372 | Sucrose                          | 0.999 | 408.433 | 365.106 | carbohydrate | [H]+ | + | + | + |
| 373 | D-Maltose                        | 0.997 | 420.528 | 365.106 | carbohydrate | [H]+ | + | + | + |
| 374 | (+)-Lyoniresinol 9-glucoside     | 0.987 | 155.020 | 583.236 | carbohydrate | [H]+ | + | + | + |

|     |                                                                                 |       |         |         |                       |      |   |   |   |
|-----|---------------------------------------------------------------------------------|-------|---------|---------|-----------------------|------|---|---|---|
| 375 | Turanose                                                                        | 0.987 | 485.216 | 365.106 | e<br>carbohydrat<br>e | [H]+ | + | + | + |
| 376 | Cyanidin 3-glucoside                                                            | 0.985 | 343.937 | 450.114 | e<br>carbohydrat<br>e | [H]+ | + | - | - |
| 377 | 9-Hydroxy-4-methoxypsoralen<br>9-glucoside                                      | 0.971 | 405.236 | 395.094 | e<br>carbohydrat<br>e | [H]+ | + | + | + |
| 378 | Beta-1,4-mannose-N-acetylglucosa<br>mine                                        | 0.944 | 351.224 | 384.153 | e<br>carbohydrat<br>e | [H]+ | + | + | + |
| 379 | Prenyl arabinosyl-(1->6)-glucoside                                              | 0.930 | 361.358 | 381.174 | e<br>carbohydrat<br>e | [H]+ | - | + | - |
| 380 | Calycosin 7-galactoside                                                         | 0.927 | 198.127 | 447.128 | e<br>carbohydrat<br>e | [H]+ | + | + | + |
| 381 | Taxifolin 3-arabinoside                                                         | 0.924 | 36.939  | 437.105 | e<br>carbohydrat<br>e | [H]+ | - | - | + |
| 382 | 2-Hydroxy-2-phenylacetonitrile<br>O-[b-D-apiosyl-(1->2)-b-D-glucosi<br>de]      | 0.923 | 360.495 | 428.153 | e<br>carbohydrat<br>e | [H]+ | + | - | - |
| 383 | D-Galactose                                                                     | 0.892 | 517.086 | 163.060 | e<br>carbohydrat<br>e | [H]+ | + | + | + |
| 384 | Kojibiose                                                                       | 0.869 | 387.691 | 325.112 | e<br>carbohydrat<br>e | [H]+ | + | + | + |
| 385 | 2-Galloylglucose                                                                | 0.869 | 367.811 | 333.085 | e<br>carbohydrat<br>e | [H]+ | + | + | + |
| 386 | Agaritinal                                                                      | 0.855 | 378.251 | 266.111 | e<br>carbohydrat<br>e | [H]+ | + | + | + |
| 387 | Hydroxytyrosol 1-O-glucoside                                                    | 0.841 | 204.073 | 317.126 | e<br>carbohydrat<br>e | [H]+ | + | + | + |
| 388 | D-Tagatose                                                                      | 0.800 | 387.331 | 163.060 | e<br>carbohydrat<br>e | [H]+ | + | + | + |
| 389 | Methyl<br>(R)-8-Hydroxy-9-decene-4,6-diyno<br>ate glucoside                     | 0.787 | 327.995 | 355.138 | e<br>carbohydrat<br>e | [H]+ | - | + | - |
| 390 | alpha-L-Rhamnopyranosyl-(1->3)-<br>alpha-D-galactopyranosyl-(1->3)-L<br>-fucose | 0.769 | 241.274 | 473.182 | e<br>carbohydrat<br>e | [H]+ | - | - | + |
| 391 | beta-D-Glucosamine                                                              | 0.737 | 517.046 | 180.086 | e<br>carbohydrat<br>e | [H]+ | + | + | + |
| 392 | Ethyl beta-D-glucopyranoside                                                    | 0.727 | 223.584 | 209.103 | e<br>carbohydrat<br>e | [H]+ | - | - | + |
| 393 | Fructosamine                                                                    | 0.724 | 466.580 | 180.087 | e<br>carbohydrat<br>e | [H]+ | + | + | + |
| 394 | Sorbose 1-phosphate                                                             | 0.684 | 455.275 | 261.036 | e<br>carbohydrat<br>e | [H]+ | + | + | + |

|     |                                                    |       |         |         |              |      |   |   |   |
|-----|----------------------------------------------------|-------|---------|---------|--------------|------|---|---|---|
| 395 | Cholesterol glucuronide                            | 0.652 | 33.740  | 563.393 | carbohydrate | [H]+ | + | + | - |
| 396 | Gentiotriose                                       | 0.618 | 469.395 | 505.176 | carbohydrate | [H]+ | + | + | + |
| 397 | 1-[(5-Amino-5-carboxypentyl)amino]-1-deoxyfructose | 0.612 | 476.136 | 309.165 | carbohydrate | [H]+ | - | + | - |
| 398 | D-Arabinose 5-phosphate                            | 0.608 | 436.115 | 213.016 | carbohydrate | [H]+ | + | - | + |
| 399 | Maltotriose                                        | 0.993 | 469.554 | 527.158 | carbohydrate | [H]+ | + | + | + |
| 400 | Neotrehalose                                       | 0.959 | 661.399 | 365.105 | carbohydrate | [H]+ | + | + | + |
| 401 | 3,3,5-triiodo-L-thyronine-beta-D-glucuronoside     | 1.000 | 627.137 | 132.102 | carbohydrate | [H]+ | + | + | + |
| 402 | Aldehydo-D-xylose                                  | 0.764 | 336.445 | 149.044 | carbohydrate | [H]- | + | + | + |
| 403 | Chrysoeriol 7-O-(6"-malonyl-glucoside)             | 0.590 | 236.021 | 549.123 | carbohydrate | [H]+ | + | - | + |
| 404 | 1-Deoxy-D-glucitol                                 | 0.574 | 127.835 | 167.092 | carbohydrate | [H]+ | + | - | + |
| 405 | 9-Hydroxy-7-megastigmen-3-one glucoside            | 0.566 | 440.555 | 373.219 | carbohydrate | [H]+ | + | - | + |
| 406 | Lithocholate 3-O-glucuronide                       | 0.443 | 327.219 | 553.334 | carbohydrate | [H]+ | + | - | + |
| 407 | 4',8-Dimethylgossypetin 3-glucoside                | 0.498 | 180.767 | 509.129 | carbohydrate | [H]+ | + | + | + |
| 408 | 4-Methoxybenzyl glucoside                          | 0.469 | 141.861 | 301.129 | carbohydrate | [H]+ | + | + | + |
| 409 | Goyaglycoside                                      | 0.483 | 313.075 | 781.474 | carbohydrate | [H]+ | + | + | + |
| 410 | 4'-Methylliquiritigenin 7-rhamnoside               | 0.410 | 143.305 | 417.154 | carbohydrate | [H]+ | + | + | + |
| 411 | Marmesin rhamnoside                                | 0.411 | 93.043  | 393.151 | carbohydrate | [H]+ | + | + | + |
| 412 | Melibiose                                          | 0.467 | 416.475 | 360.150 | carbohydrate | [H]+ | + | + | + |
| 413 | Citraconic acid                                    | 1.000 | 455.419 | 129.018 | fatty acids  | [H]- | + | + | + |
| 414 | Myristic acid                                      | 1.000 | 51.084  | 227.201 | fatty acids  | [H]- | + | + | + |
| 415 | 16-Methylheptadecanoic acid                        | 1.000 | 50.084  | 283.264 | fatty acids  | [H]- | + | + | + |
| 416 | Ricinoleic acid                                    | 0.999 | 55.227  | 297.242 | fatty acids  | [H]- | + | + | + |
| 417 | Leucinic acid                                      | 0.998 | 137.152 | 131.070 | fatty acids  | [H]- | + | + | + |
| 418 | 3-Methyl-2-oxovaleric acid                         | 0.997 | 17.681  | 129.054 | fatty acids  | [H]- | + | + | + |
| 419 | Mesaconic acid                                     | 0.994 | 467.967 | 129.018 | fatty acids  | [H]- | + | + | + |
| 420 | Dihydrojasmonic acid                               | 0.992 | 133.922 | 211.133 | fatty acids  | [H]- | + | + | + |

|     |                                                           |       |         |         |             |      |   |   |   |
|-----|-----------------------------------------------------------|-------|---------|---------|-------------|------|---|---|---|
| 421 | Myristoleic acid                                          | 0.991 | 716.836 | 225.185 | fatty acids | [H]- | + | + | + |
| 422 | 9,10-Epoxyoctadecenoic acid                               | 0.991 | 54.675  | 295.227 | fatty acids | [H]- | + | + | + |
| 423 | 2-Oxovaleric acid                                         | 0.988 | 39.245  | 115.039 | fatty acids | [H]- | + | + | + |
| 424 | 16-Hydroxy hexadecanoic acid                              | 0.984 | 76.769  | 271.228 | fatty acids | [H]- | + | + | + |
| 425 | Methylsuccinic acid                                       | 0.984 | 374.444 | 131.034 | fatty acids | [H]- | + | + | + |
| 426 | 3-Hydroxycapric acid                                      | 0.980 | 104.515 | 187.133 | fatty acids | [H]- | + | + | + |
| 427 | Itaconic acid                                             | 0.973 | 66.828  | 129.018 | fatty acids | [H]- | + | + | + |
| 428 | 9,10-DHOME                                                | 0.948 | 65.547  | 313.238 | fatty acids | [H]- | + | + | + |
| 429 | 15-Methylpalmitate                                        | 0.943 | 47.091  | 269.248 | fatty acids | [H]- | - | + | + |
| 430 | Behenic acid                                              | 0.939 | 47.066  | 339.326 | fatty acids | [H]- | + | + | + |
| 431 | (10E,12Z)-9-HODE                                          | 0.926 | 229.011 | 295.227 | fatty acids | [H]- | + | + | + |
| 432 | Citramalic acid                                           | 0.887 | 485.862 | 147.029 | fatty acids | [H]- | + | + | + |
| 433 | Pelargonic acid                                           | 0.870 | 45.841  | 157.122 | fatty acids | [H]- | - | + | + |
| 434 | Traumatic acid                                            | 0.862 | 241.441 | 227.128 | fatty acids | [H]- | + | + | + |
| 435 | Dethiobiotin                                              | 0.858 | 307.820 | 213.124 | fatty acids | [H]- | + | + | + |
| 436 | 2-Methylglutaric acid                                     | 0.846 | 72.160  | 145.050 | fatty acids | [H]- | + | + | + |
| 437 | 2-Hydroxycinnamic acid                                    | 0.820 | 156.175 | 163.039 | fatty acids | [H]- | + | + | + |
| 438 | 2,3-Dinor-TXB2                                            | 0.791 | 106.504 | 341.196 | fatty acids | [H]- | - | + | - |
| 439 | Prostaglandin F2a                                         | 0.786 | 57.606  | 353.233 | fatty acids | [H]- | - | + | + |
| 440 | 2-Hydroxystearic acid                                     | 0.782 | 55.416  | 299.259 | fatty acids | [H]- | + | + | + |
| 441 | Sinapic acid                                              | 0.725 | 262.788 | 223.061 | fatty acids | [H]- | + | + | + |
| 442 | 2,3-Dinor-6-keto-prostaglandin F1a                        | 0.724 | 103.631 | 325.202 | fatty acids | [H]- | + | + | + |
| 443 | (9xi,10xi,12xi)-9,10-Dihydroxy-12-octadecenoic acid       | 0.702 | 79.663  | 313.238 | fatty acids | [H]- | + | + | + |
| 444 | (R)-3-Hydroxy-tetradecanoic acid                          | 0.684 | 71.298  | 243.196 | fatty acids | [H]- | + | + | + |
| 445 | 3,3-Dimethylglutaric acid                                 | 0.680 | 65.177  | 159.065 | fatty acids | [H]- | + | + | + |
| 446 | Suberic acid                                              | 0.665 | 268.397 | 173.081 | fatty acids | [H]- | + | + | + |
| 447 | 2-Hydroxy-3-methylbutyric acid                            | 0.619 | 161.627 | 117.055 | fatty acids | [H]- | + | + | + |
| 448 | Isopalmitic acid                                          | 0.601 | 229.613 | 255.232 | fatty acids | [H]- | + | + | + |
| 449 | 2-Isopropylmalic acid                                     | 0.600 | 64.551  | 175.060 | fatty acids | [H]- | + | + | + |
| 450 | Dodecanedioic acid                                        | 0.588 | 161.761 | 229.144 | fatty acids | [H]- | - | - | + |
| 451 | Azelaic acid                                              | 0.585 | 362.454 | 187.097 | fatty acids | [H]- | + | + | + |
| 452 | Palmitic acid                                             | 0.575 | 50.558  | 255.232 | fatty acids | [H]- | + | + | + |
| 453 | Glyceric acid                                             | 0.500 | 3.449   | 105.018 | fatty acids | [H]- | + | + | + |
| 454 | Oenanthoside A                                            | 0.999 | 344.484 | 341.121 | fatty acids | [H]+ | + | + | + |
| 455 | 20-Hydroxy-PGE2                                           | 0.998 | 107.796 | 351.213 | fatty acids | [H]+ | + | + | + |
| 456 | gamma-Aminobutyric acid                                   | 0.980 | 170.569 | 104.071 | fatty acids | [H]+ | + | + | + |
| 457 | Prostaglandin I2                                          | 0.997 | 111.347 | 353.229 | fatty acids | [H]+ | + | + | + |
| 458 | 3-Dehydroxycarnitine                                      | 0.991 | 70.496  | 146.117 | fatty acids | [H]+ | + | + | + |
| 459 | (9S,10E,12Z,15Z)-9-Hydroxy-10,12,15-octadecatrienoic acid | 0.930 | 36.134  | 277.215 | fatty acids | [H]+ | + | + | + |
| 460 | Amino adipic acid                                         | 0.895 | 389.438 | 162.076 | fatty acids | [H]+ | + | + | + |
| 461 | 4,8 Dimethylnonanoyl carnitine                            | 0.886 | 64.175  | 330.264 | fatty acids | [H]+ | + | + | + |

|     |                                                         |       |         |         |             |      |   |   |   |
|-----|---------------------------------------------------------|-------|---------|---------|-------------|------|---|---|---|
| 462 | Linoleoyl ethanolamide                                  | 0.856 | 35.904  | 324.289 | fatty acids | [H]+ | + | + | + |
| 463 | 2-Oxo-4-methylthiobutanoic acid                         | 0.847 | 389.364 | 149.027 | fatty acids | [H]+ | - | - | + |
| 464 | PS(18:0/22:6(4Z,7Z,10Z,13Z,16Z,19Z))                    | 0.815 | 178.600 | 836.541 | fatty acids | [H]+ | + | + | + |
| 465 | L-2,4-diaminobutyric acid                               | 0.802 | 148.220 | 119.082 | fatty acids | [H]+ | + | + | + |
| 466 | Prostaglandin H2 2-glyceryl Ester                       | 0.787 | 57.268  | 427.266 | fatty acids | [H]+ | + | - | - |
| 467 | Deacetylisovaltrate                                     | 0.763 | 396.479 | 381.188 | fatty acids | [H]+ | + | - | - |
| 468 | Tetracosahexaenoic acid                                 | 0.760 | 176.027 | 357.278 | fatty acids | [H]+ | - | - | - |
| 469 | L-Acetylcarnitine                                       | 0.755 | 406.107 | 204.123 | fatty acids | [H]+ | + | + | + |
| 470 | 6,15-Diketo,13,14-dihydro-PGF1a                         | 0.702 | 477.341 | 369.224 | fatty acids | [H]+ | + | + | + |
| 471 | (-)-11-Hydroxy-9,15,16-trioxoocta decanoic acid         | 0.700 | 434.564 | 343.209 | fatty acids | [H]+ | + | + | + |
| 472 | PS(18:0/22:0)                                           | 0.662 | 51.001  | 848.627 | fatty acids | [H]+ | + | + | + |
| 473 | Dimethyl fumarate                                       | 0.658 | 517.126 | 145.050 | fatty acids | [H]+ | + | + | + |
| 474 | DG(14:1(9Z)/22:4(7Z,10Z,13Z,16Z)/0:0)                   | 0.656 | 182.582 | 615.497 | fatty acids | [H]+ | + | + | - |
| 475 | (9R,10S,12Z)-9,10-Dihydroxy-8-oxo-12-octadecenoic acid  | 0.634 | 106.250 | 329.232 | fatty acids | [H]+ | + | - | + |
| 476 | Glycerol                                                | 0.741 | 449.024 | 93.055  | fatty acids | [H]+ | + | + | + |
| 477 | 5-Aminopentanoic acid                                   | 0.997 | 375.751 | 116.071 | fatty acids | [H]- | + | + | + |
| 478 | Panaquinquecol 1                                        | 0.653 | 203.871 | 293.211 | fatty acyl  | [H]+ | + | - | - |
| 479 | 13-Tetradecene-1,3-diyne-6,7-diol                       | 0.735 | 64.245  | 221.153 | fatty acyl  | [H]+ | + | - | - |
| 480 | Isopentyl beta-D-glucoside                              | 0.727 | 159.254 | 251.150 | fatty acyl  | [H]+ | - | + | + |
| 481 | 6-Epi-7-isocucurbit acid glucoside                      | 0.721 | 464.516 | 375.199 | fatty acyl  | [H]+ | + | + | + |
| 482 | Dihydrozeatin-O-glucoside                               | 0.800 | 411.501 | 384.187 | fatty acyl  | [H]+ | - | + | + |
| 483 | Dieporeticenin                                          | 0.789 | 31.692  | 573.486 | fatty acyl  | [H]+ | + | + | - |
| 484 | Alpha-dimorphecolic acid                                | 0.836 | 35.959  | 279.232 | fatty acyl  | [H]+ | + | + | + |
| 485 | 13-L-Hydroperoxylinoic acid                             | 0.834 | 139.604 | 295.227 | fatty acyl  | [H]+ | + | + | + |
| 486 | N-Cyclopropyl-trans-2-cis-6-nonadienamide               | 0.851 | 597.101 | 194.154 | fatty acyl  | [H]+ | + | + | + |
| 487 | Polyoxyethylene (600) monoricinoleate                   | 0.877 | 270.422 | 341.305 | fatty acyl  | [H]+ | + | + | + |
| 488 | Arginyl-Valine                                          | 0.871 | 400.259 | 274.187 | fatty acyl  | [H]+ | + | + | + |
| 489 | Oleamide                                                | 0.998 | 230.549 | 282.279 | fatty acyl  | [H]+ | + | + | + |
| 490 | Lauroyl diethanolamide                                  | 0.981 | 674.365 | 288.253 | fatty acyl  | [H]+ | + | + | + |
| 491 | Palmitic amide                                          | 0.966 | 33.985  | 256.263 | fatty acyl  | [H]+ | + | + | + |
| 492 | 10E,12Z-Octadecadienoic acid                            | 1.000 | 50.022  | 279.232 | fatty acyl  | [H]- | + | + | + |
| 493 | Alpha-Linolenic acid                                    | 1.000 | 50.315  | 277.217 | fatty acyl  | [H]- | + | + | + |
| 494 | Linoleic acid                                           | 0.992 | 98.765  | 279.232 | fatty acyl  | [H]- | + | + | + |
| 495 | Gamma-Linolenic acid                                    | 0.992 | 498.047 | 277.217 | fatty acyl  | [H]- | + | + | + |
| 496 | 13-OxoODE                                               | 0.989 | 38.051  | 293.212 | fatty acyl  | [H]- | + | + | + |
| 497 | Jasmonic acid                                           | 0.988 | 100.604 | 209.117 | fatty acyl  | [H]- | - | + | + |
| 498 | (10E,12Z)-(9S)-9-Hydroperoxyoctadeca-10,12-dienoic acid | 0.975 | 99.786  | 311.223 | fatty acyl  | [H]- | + | + | + |



|     |                                                                                                                   |       |         |         |                      |      |   |   |   |
|-----|-------------------------------------------------------------------------------------------------------------------|-------|---------|---------|----------------------|------|---|---|---|
| 499 | Bovinic acid                                                                                                      | 0.855 | 155.727 | 279.232 | fatty acyl           | [H]- | + | + | + |
| 500 | 9,10-epoxyoctadecanoic acid                                                                                       | 0.756 | 37.111  | 297.242 | fatty acyl           | [H]- | + | + | + |
| 501 | Linoelaidic acid                                                                                                  | 0.500 | 37.185  | 279.232 | fatty acyl           | [H]- | + | + | + |
| 502 | Glycerol 3-phosphate                                                                                              | 0.849 | 453.589 | 171.005 | Glycerophospholipids | [H]- | + | + | + |
| 503 | LysoPA(16:0/0:0)                                                                                                  | 0.703 | 276.593 | 409.236 | Glycerophospholipids | [H]- | + | + | + |
| 504 | LysoPA(18:1(9Z)/0:0)                                                                                              | 0.586 | 273.250 | 435.252 | Glycerophospholipids | [H]- | + | + | + |
| 505 | LysoPE(18:3(6Z,9Z,12Z)/0:0)                                                                                       | 0.922 | 230.628 | 476.277 | Glycerophospholipids | [H]+ | + | + | + |
| 506 | 1-Palmitoylglycerophosphoinositol                                                                                 | 0.884 | 273.602 | 573.302 | Glycerophospholipids | [H]+ | + | + | + |
| 507 | DG(22:5(4Z,7Z,10Z,13Z,16Z)/14:0/0:0)                                                                              | 0.859 | 32.319  | 615.497 | Glycerolipids        | [H]+ | + | + | + |
| 508 | 1-Arachidonoylglycerophosphoinositol                                                                              | 0.832 | 32.301  | 621.308 | Glycerophospholipids | [H]+ | + | - | + |
| 509 | 2-acetyl-1-alkyl-sn-glycero-3-phosphocholine                                                                      | 0.739 | 198.728 | 524.371 | Glycerophospholipids | [H]+ | - | + | - |
| 510 | LysoPC(14:0/0:0)                                                                                                  | 0.537 | 228.128 | 468.308 | fatty acids          | [H]+ | + | + | + |
| 511 | LysoPC(16:1(9Z)/0:0)                                                                                              | 0.528 | 225.425 | 494.325 | fatty acids          | [H]+ | + | + | + |
| 512 | LysoPC(18:2(9Z,12Z))                                                                                              | 0.630 | 255.392 | 520.335 | fatty acids          | [H]+ | - | + | + |
| 513 | LysoPC(18:3(6Z,9Z,12Z))                                                                                           | 0.534 | 225.366 | 518.324 | fatty acids          | [H]+ | + | + | + |
| 514 | LysoPE(16:0/0:0)                                                                                                  | 0.964 | 229.741 | 454.293 | fatty acids          | [H]+ | - | + | + |
| 515 | LysoPE(18:1(9Z)/0:0)                                                                                              | 0.717 | 226.994 | 480.309 | fatty acids          | [H]+ | - | + | + |
| 516 | LysoPE(20:5(5Z,8Z,11Z,14Z,17Z)/0:0)                                                                               | 0.850 | 228.739 | 500.275 | fatty acids          | [H]+ | + | + | + |
| 517 | (2'E,4'Z,7'Z,8E)-Colnelenic acid                                                                                  | 0.703 | 63.346  | 293.211 | fatty acids          | [H]+ | + | + | + |
| 518 | MG(0:0/18:3(6Z,9Z,12Z)/0:0)                                                                                       | 0.741 | 35.927  | 353.268 | fatty acids          | [H]+ | + | - | + |
| 519 | MG(0:0/18:4(6Z,9Z,12Z,15Z)/0:0)                                                                                   | 0.695 | 36.239  | 351.252 | fatty acids          | [H]+ | + | - | + |
| 520 | Daidzein                                                                                                          | 0.999 | 260.581 | 253.050 | Isoflavones          | [H]- | + | + | + |
| 521 | Genistein                                                                                                         | 0.999 | 37.315  | 269.045 | Isoflavones          | [H]- | + | + | + |
| 522 | Luteolin 7-glucoside                                                                                              | 0.964 | 189.276 | 447.093 | flavonoids           | [H]- | + | + | + |
| 523 | (-)-Epiafzelechin                                                                                                 | 0.962 | 58.128  | 273.076 | flavonoids           | [H]- | + | + | + |
| 524 | Quercetin                                                                                                         | 0.945 | 91.000  | 301.034 | flavonoids           | [H]- | + | + | + |
| 525 | Kaempferide                                                                                                       | 0.944 | 131.720 | 299.055 | flavonoids           | [H]- | + | + | + |
| 526 | Diosmetin                                                                                                         | 0.924 | 114.005 | 299.055 | flavonoids           | [H]- | + | + | + |
| 527 | 2-(3,4-dihydroxyphenyl)-3,5-dihydroxy-7-methoxy-4H-chromen-4-one                                                  | 0.880 | 51.974  | 315.051 | flavonoids           | [H]- | + | + | + |
| 528 | 5,7-dihydroxy-2-(4-hydroxy-3-methoxyphenyl)-3-{[3,4,5-trihydroxy-6-(hydroxymethyl)oxan-2-yl]oxy}-4H-chromen-4-one | 0.782 | 179.797 | 477.104 | flavonoids           | [H]- | + | + | + |

|     |                                                                                                                       |       |         |         |                      |      |   |   |   |
|-----|-----------------------------------------------------------------------------------------------------------------------|-------|---------|---------|----------------------|------|---|---|---|
| 529 | Norizalpinin                                                                                                          | 0.754 | 294.630 | 269.045 | flavonoids           | [H]- | + | + | + |
| 530 | Mulberrin                                                                                                             | 0.979 | 169.612 | 421.162 | flavonoids           | [H]- | + | + | + |
| 531 | Isoquercitrin                                                                                                         | 0.729 | 314.534 | 463.088 | flavonoids           | [H]- | + | + | + |
| 532 | Liquiritin                                                                                                            | 0.713 | 164.280 | 417.119 | flavonoids           | [H]- | + | + | + |
| 533 | Naringin                                                                                                              | 0.653 | 224.806 | 579.172 | flavonoids           | [H]- | - | - | + |
| 534 | Panasenoside                                                                                                          | 0.628 | 300.843 | 609.147 | flavonoids           | [H]- | + | + | + |
| 535 | 3,5,7-trihydroxy-2-(4-hydroxyphenyl)-3,4-dihydro-2H-1-benzopyran-4-one                                                | 0.521 | 58.759  | 287.056 | flavonoids           | [H]- | + | + | + |
| 536 | 5,7-dihydroxy-2-phenyl-6-[3,4,5-trihydroxy-6-(hydroxymethyl)oxan-2-yl]-8-(3,4,5-trihydroxyoxan-2-yl)-4H-chromen-4-one | 0.408 | 81.574  | 547.145 | flavonoids           | [H]- | + | + | + |
| 537 | Phlorizin                                                                                                             | 0.351 | 225.433 | 435.130 | flavonoids           | [H]- | + | + | + |
| 538 | (E)-3-(4-Hydroxyphenyl)-2-propenal                                                                                    | 0.969 | 281.452 | 147.044 | Lignans              | [H]- | + | + | + |
| 539 | 4-Methoxycinnamic acid                                                                                                | 0.939 | 369.638 | 177.055 | Lignans              | [H]- | + | + | + |
| 540 | Hydrocinnamic acid                                                                                                    | 0.913 | 370.661 | 149.060 | phenylprop<br>anoids | [H]- | + | + | + |
| 541 | 3,4-Dihydroxyhydrocinnamic acid                                                                                       | 0.842 | 96.278  | 181.050 | phenylprop<br>anoids | [H]- | + | + | + |
| 542 | 3-(2-Hydroxyphenyl)propanoic acid                                                                                     | 0.821 | 117.611 | 165.055 | phenylprop<br>anoids | [H]- | + | + | + |
| 543 | Zeranol                                                                                                               | 0.462 | 31.719  | 321.174 | phenylprop<br>anoids | [H]- | + | + | + |
| 544 | Procyanidin B2                                                                                                        | 0.861 | 247.977 | 577.135 | Anthocyani<br>ns     | [H]- | + | + | + |
| 545 | 3,3',4'5-Tetrahydroxystilbene                                                                                         | 0.933 | 116.753 | 243.066 | stilbene             | [H]- | + | + | + |
| 546 | Marmesin                                                                                                              | 0.897 | 136.361 | 245.082 | Coumarins            | [H]- | + | + | + |
| 547 | Protocatechuic acid                                                                                                   | 0.812 | 39.594  | 153.018 | Phenolic<br>acid     | [H]- | + | + | + |
| 548 | Gallic acid                                                                                                           | 0.649 | 32.854  | 169.013 | Phenols              | [H]- | + | + | + |
| 549 | Pyrocatechol                                                                                                          | 0.993 | 44.801  | 109.028 | Phenols              | [H]- | + | + | + |
| 550 | benzene-1,2,4-triol                                                                                                   | 0.967 | 392.763 | 125.023 | Phenols              | [H]- | + | + | + |
| 551 | 2-Pyrocatechuic acid                                                                                                  | 0.998 | 301.521 | 153.018 | Phenolic<br>acids    | [H]- | + | + | + |
| 552 | Feruloyl-2-hydroxyputrescine                                                                                          | 1.000 | 152.309 | 281.149 | Lignans              | [H]+ | + | + | + |
| 553 | Maltol                                                                                                                | 1.000 | 69.911  | 127.039 | Phenols              | [H]+ | + | + | + |
| 554 | Kaempferol                                                                                                            | 0.998 | 299.527 | 287.055 | flavonoids           | [H]+ | + | + | + |
| 555 | 11-Methylgerberinol                                                                                                   | 0.998 | 405.415 | 379.121 | Coumarins            | [H]+ | + | + | + |
| 556 | Astragalin                                                                                                            | 0.996 | 189.703 | 449.107 | flavonoids           | [H]+ | + | + | + |
| 557 | Cosmosiin                                                                                                             | 0.996 | 201.839 | 433.112 | flavonoids           | [H]+ | + | + | + |
| 558 | Biochanin A                                                                                                           | 0.995 | 193.060 | 285.075 | Isoflavones          | [H]+ | + | + | + |
| 559 | Luteolin                                                                                                              | 0.994 | 521.279 | 287.054 | flavonoids           | [H]+ | + | + | + |

|     |                                                |       |         |         |                   |      |   |   |   |
|-----|------------------------------------------------|-------|---------|---------|-------------------|------|---|---|---|
| 560 | Daidzin                                        | 0.992 | 193.587 | 417.117 | flavonoids        | [H]+ | + | + | + |
| 561 | Peonidin-3-glucoside                           | 0.990 | 153.425 | 463.123 | flavonoids        | [H]+ | + | + | + |
| 562 | 6-Hydroxydaidzein 4'-glucoside                 | 0.989 | 155.042 | 433.112 | Isoflavones       | [H]+ | + | + | + |
| 563 | Sideritiflavone                                | 0.989 | 102.955 | 361.091 | flavonoids        | [H]+ | + | + | + |
| 564 | Genistein 5-glucoside                          | 0.988 | 126.809 | 433.112 | Isoflavones       | [H]+ | + | + | + |
| 565 | Glycitin                                       | 0.985 | 164.213 | 447.128 | Isoflavones       | [H]+ | + | + | + |
| 566 | Naringenin                                     | 0.984 | 175.125 | 273.075 | flavonoids        | [H]+ | + | + | + |
| 567 | 3',4',5',7-Tetrahydroxyisoflavanone            | 0.982 | 227.153 | 289.070 | flavonoids        | [H]+ | + | + | + |
| 568 | Isorhamnetin                                   | 0.981 | 192.786 | 317.066 | flavonoids        | [H]+ | + | + | + |
| 569 | Luteolin 4'-glucoside                          | 0.971 | 523.336 | 449.107 | flavonoids        | [H]+ | + | + | + |
| 570 | 6"-O-Acetylgenistin                            | 0.969 | 161.269 | 475.123 | Isoflavones       | [H]+ | + | + | + |
| 571 | Pelargonin                                     | 0.968 | 127.278 | 595.166 | flavonoids        | [H]+ | + | + | + |
| 572 | 6"-Malonylgenistin                             | 0.965 | 240.327 | 519.114 | Isoflavones       | [H]+ | + | + | + |
| 573 | 6"-O-Acetyldaidzin                             | 0.964 | 61.653  | 459.129 | Isoflavones       | [H]+ | + | + | + |
| 574 | Cyanidin 3-(4-acetylglucoside)                 | 0.960 | 117.334 | 491.118 | flavonoids        | [H]+ | + | + | + |
| 575 | Carthamone                                     | 0.959 | 475.950 | 449.107 | Lignans           | [H]+ | + | + | + |
| 576 | 6"-O-Acetylglycitin                            | 0.946 | 62.523  | 489.139 | Isoflavones       | [H]+ | + | + | + |
| 577 | Luteolin 7-galactoside                         | 0.944 | 241.710 | 449.107 | flavonoids        | [H]+ | + | + | + |
| 578 | Kaempferol 3-(6-acetylgalactoside)             | 0.944 | 148.659 | 491.119 | polyphenol<br>s   | [H]+ | + | + | + |
| 579 | Apigenin<br>7-O-(6"-O-acetylglucoside)         | 0.943 | 107.416 | 475.124 | flavonoids        | [H]+ | + | + | + |
| 580 | Epicatechin                                    | 0.938 | 176.579 | 291.086 | flavonoids        | [H]+ | + | - | + |
| 581 | Genistin                                       | 0.937 | 219.125 | 433.113 | Isoflavones       | [H]+ | + | + | + |
| 582 | Acetaminophen                                  | 0.937 | 102.583 | 152.070 | Phenols           | [H]+ | + | + | + |
| 583 | Occidentoside                                  | 0.930 | 517.126 | 705.182 | flavonoids        | [H]+ | + | + | + |
| 584 | Apiin                                          | 0.929 | 210.098 | 565.155 | flavonoids        | [H]+ | + | + | + |
| 585 | Epicatechin 3-O-(4-methylgallate)              | 0.909 | 187.905 | 457.110 | flavonoids        | [H]+ | + | + | + |
| 586 | Subaphylline                                   | 0.905 | 210.486 | 265.154 | Lignans           | [H]+ | + | + | + |
| 587 | (±)-2-(1-Methylpropyl)-4,6-dinitro<br>phenol   | 0.887 | 473.430 | 241.082 | Phenols           | [H]+ | + | + | + |
| 588 | Petunidin 3-glucoside                          | 0.887 | 192.712 | 479.119 | polyphenol<br>s   | [H]+ | + | + | + |
| 589 | Cyanidin 3-laminaribioside                     | 0.881 | 298.582 | 611.160 | Anthocyanins      | [H]+ | + | + | + |
| 590 | Phenol                                         | 0.866 | 325.557 | 95.050  | Phenols           | [H]+ | + | + | + |
| 591 | Trilobatin                                     | 0.865 | 202.976 | 437.143 | flavonoids        | [H]+ | + | + | + |
| 592 | (Z)-Resveratrol<br>3-(6"-sulfoglucopyranoside) | 0.865 | 189.620 | 471.089 | polyphenol<br>s   | [H]+ | + | + | + |
| 593 | (-)-Epigallocatechin<br>3-(4-methyl-gallate)   | 0.858 | 277.151 | 473.106 | Phenolic<br>acids | [H]+ | + | + | + |
| 594 | 6'-Malonyltrifolirhizin                        | 0.844 | 260.005 | 533.128 | Isoflavones       | [H]+ | + | + | + |
| 595 | Malvidin 3-glucoside                           | 0.839 | 100.318 | 493.133 | anthocyanin       | [H]+ | + | + | + |

|     |                                                                     |       |         |         |                      |      |   |   |   |
|-----|---------------------------------------------------------------------|-------|---------|---------|----------------------|------|---|---|---|
| 596 | 2'-Hydroxygenistein<br>7-(6"-malonylglucoside)                      | 0.834 | 266.351 | 535.108 | Isoflavones          | [H]+ | + | + | + |
| 597 | Yuccaol C                                                           | 0.831 | 468.801 | 543.131 | phenylprop<br>anoids | [H]+ | + | + | + |
| 598 | Dihydrodaidzin                                                      | 0.814 | 120.435 | 419.133 | flavonoids           | [H]+ | + | + | + |
| 599 | Diferuloylputrescine                                                | 0.808 | 56.704  | 441.201 | Lignans              | [H]+ | + | - | + |
| 600 | 2-Ethylacrylic acid                                                 | 0.800 | 407.108 | 101.060 | flavonoids           | [H]+ | + | + | + |
| 601 | Quercitrin                                                          | 0.762 | 189.748 | 487.064 | flavonoids           | [H]+ | + | + | + |
| 602 | Rhoifolin                                                           | 0.731 | 299.550 | 579.171 | polyphenol<br>s      | [H]+ | + | + | + |
| 603 | 6"-O-Malonyldaidzin                                                 | 0.723 | 214.586 | 503.119 | Isoflavones          | [H]+ | + | + | + |
| 604 | Flavidulol C                                                        | 0.711 | 415.988 | 515.319 | flavonoids           | [H]+ | - | + | - |
| 605 | Ononin                                                              | 0.684 | 118.233 | 431.134 | Isoflavones          | [H]+ | + | + | + |
| 606 | [10]-Paradol                                                        | 0.664 | 230.540 | 335.257 | Phenols              | [H]+ | + | + | + |
| 607 | trans-Isoasarone                                                    | 0.641 | 322.720 | 209.117 | flavonoids           | [H]+ | + | + | + |
| 608 | Dianhydroaurasperone C                                              | 0.602 | 487.248 | 557.147 | flavonoids           | [H]+ | + | + | + |
| 609 | Phlorin                                                             | 0.994 | 164.109 | 289.091 | polyphenol<br>s      | [H]+ | + | + | + |
| 610 | 4-Aminophenol                                                       | 0.944 | 51.147  | 110.060 | phenol               | [H]+ | + | + | + |
| 611 | 2-(1,2-Diamino-1-propenyl)phenol                                    | 0.699 | 55.811  | 165.102 | phenol               | [H]+ | + | + | + |
| 612 | Citrusinine II                                                      | 0.448 | 60.782  | 288.086 | flavonoids           | [H]- | + | + | + |
| 613 | 5-Heptyltetrahydro-2-oxo-3-furanc<br>arboxylic acid                 | 0.525 | 58.136  | 229.143 | Isoflavones          | [H]- | + | + | + |
| 614 | 6"-O-Malonylwistin                                                  | 0.829 | 91.712  | 547.145 | Isoflavones          | [H]- | + | + | - |
| 615 | Soyasaponin IV                                                      | 0.587 | 257.040 | 767.458 | flavonoids           | [H]- | + | + | - |
| 616 | 5,7-Dihydroxy-2',6-dimethoxyisofl<br>avone 7-rhamnoside             | 0.541 | 190.466 | 461.144 | Isoflavones          | [H]- | + | + | + |
| 617 | 4',5,6-Trimethylscutellarein<br>7-glucoside                         | 0.800 | 181.813 | 491.154 | flavonoids           | [H]- | + | + | + |
| 618 | Calendulaglycoside E                                                | 0.453 | 262.060 | 795.450 | flavonoids           | [H]- | + | + | + |
| 619 | Taurocholic acid                                                    | 0.652 | 333.665 | 514.287 | bile acid            | [H]- | + | + | - |
| 620 | 6-Deoxyalcoholsterone                                               | 0.716 | 32.220  | 449.362 | bile acid            | [H]+ | + | + | + |
| 621 | Quinic acid                                                         | 0.986 | 356.415 | 191.055 | alcohol              | [H]- | + | + | + |
| 622 | 2-(3,4-dihydroxyphenyl)-3,4-dihyd<br>ro-2H-1-benzopyran-3,5,7-triol | 0.930 | 98.050  | 289.071 | alcohol              | [H]- | + | + | + |
| 623 | myo-Inositol                                                        | 0.900 | 412.688 | 179.055 | alcohol              | [H]- | + | + | + |
| 624 | Glucose 1-phosphate                                                 | 0.559 | 476.469 | 259.022 | alcohol              | [H]- | + | + | + |
| 625 | Diacetone alcohol                                                   | 0.980 | 72.839  | 115.075 | alcohol              | [H]- | + | + | - |
| 626 | 2-Phenylethanol                                                     | 0.984 | 183.349 | 105.070 | alcohol              | [H]+ | + | + | + |
| 627 | Phytosphingosine                                                    | 0.916 | 38.587  | 318.300 | alcohol              | [H]+ | + | + | + |
| 628 | (±)-2-Pentanethiol                                                  | 0.897 | 394.777 | 105.074 | alcohol              | [H]+ | + | + | + |
| 629 | 1-Hexanethiol                                                       | 0.853 | 375.193 | 119.090 | alcohol              | [H]+ | + | + | + |
| 630 | alpha-[3-(Nitrosoamino)propyl]-3-<br>pyridinemethanol               | 0.778 | 367.518 | 196.108 | alcohol              | [H]+ | - | + | - |

|     |                                                           |       |         |         |          |      |   |   |   |
|-----|-----------------------------------------------------------|-------|---------|---------|----------|------|---|---|---|
| 631 | Santalyl acetate                                          | 0.771 | 78.710  | 263.200 | alcohol  | [H]+ | + | + | + |
| 632 | Dehydrophytosphingosine                                   | 0.757 | 160.408 | 316.284 | alcohol  | [H]+ | + | + | + |
| 633 | 7,9-Illudadiene-3,14-diol                                 | 0.709 | 94.253  | 235.169 | alcohol  | [H]+ | + | - | - |
| 634 | 3-(4-Hydroxyphenyl)-1-propanol                            | 0.509 | 34.180  | 153.091 | alcohol  | [H]+ | + | + | + |
| 635 | 3,4-Dihydroxycinnamoyl-(Z)-2-(3,4-dihydroxyphenyl)ethenol | 0.590 | 152.353 | 315.085 | alcohol  | [H]+ | - | + | + |
| 636 | 3,4-Dihydroxybenzaldehyde                                 | 1.000 | 315.986 | 137.023 | aldehyde | [H]- | + | + | + |
| 637 | Succinic acid semialdehyde                                | 0.536 | 320.428 | 101.023 | aldehyde | [H]- | + | + | + |
| 638 | 4-Hydroxybenzaldehyde                                     | 0.500 | 38.684  | 121.028 | aldehyde | [H]- | + | + | + |
| 639 | 3-(3-Furanyl)-2-methyl-2-propenal                         | 0.997 | 174.435 | 137.065 | aldehyde | [H]+ | + | + | + |
| 640 | 3-Acetamidobutanal                                        | 0.992 | 44.291  | 130.086 | aldehyde | [H]+ | + | + | + |
| 641 | Benzaldehyde                                              | 0.978 | 368.193 | 107.049 | aldehyde | [H]+ | + | + | + |
| 642 | 4-Trimethylammonibutanal                                  | 0.947 | 54.612  | 130.123 | aldehyde | [H]+ | + | + | + |
| 643 | 4-Aminobutyraldehyde                                      | 0.947 | 548.446 | 88.076  | aldehyde | [H]+ | + | + | + |
| 644 | Betaine aldehyde                                          | 0.898 | 272.815 | 102.092 | aldehyde | [H]+ | + | + | + |
| 645 | 5-Aminopentanal                                           | 0.872 | 231.942 | 102.092 | aldehyde | [H]+ | + | + | + |
| 646 | xi-3-(4-Isopropylphenyl)-2-methylpropanal                 | 0.837 | 33.956  | 191.143 | aldehyde | [H]+ | + | + | + |
| 647 | 2-Benzofurancarboxaldehyde                                | 0.813 | 325.745 | 147.044 | aldehyde | [H]+ | + | + | + |
| 648 | 2-Hexenal                                                 | 0.799 | 193.749 | 99.081  | aldehyde | [H]+ | + | + | + |
| 649 | 3-(4-Isopropylphenyl)propanal                             | 0.780 | 62.420  | 177.127 | aldehyde | [H]+ | + | + | + |
| 650 | Imidazole-4-acetaldehyde                                  | 0.751 | 63.761  | 111.055 | aldehyde | [H]+ | + | + | + |
| 651 | 3-(2-Furanyl)-2-phenyl-2-propenal                         | 0.739 | 161.669 | 199.075 | aldehyde | [H]+ | + | + | + |
| 652 | 4-Oxo-2-nonenal                                           | 0.670 | 172.180 | 155.107 | aldehyde | [H]+ | + | + | + |
| 653 | Pyridoxal                                                 | 0.649 | 69.656  | 168.065 | aldehyde | [H]+ | + | + | + |
| 654 | Methylimidazole acetaldehyde                              | 0.647 | 190.504 | 125.071 | aldehyde | [H]+ | + | + | + |
|     | Vanillin                                                  |       |         |         |          |      |   |   |   |
| 655 | 3-(L-menthoxy)propane-1,2-diol acetal                     | 0.626 | 50.251  | 365.231 | aldehyde | [H]+ | + | + | + |
| 656 | Phenylacetaldehyde                                        | 0.980 | 325.403 | 121.065 | aldehyde | [H]+ | + | + | + |
| 657 | Indoleacetaldehyde                                        | 0.966 | 51.032  | 160.075 | aldehyde | [H]+ | + | + | + |
| 658 | 2-Hydroxybenzaldehyde                                     | 1.000 | 129.627 | 121.028 | aldehyde | [H]- | + | + | + |
| 659 | 1H-Indole-3-carboxaldehyde                                | 1.000 | 63.835  | 144.044 | aldehyde | [H]- | + | + | + |
| 660 | Oxoglutaric acid                                          | 0.989 | 388.681 | 145.013 | acid     | [H]- | + | + | + |
| 661 | Phenylpyruvic acid                                        | 0.937 | 186.597 | 163.039 | acid     | [H]- | + | + | + |
| 662 | Adipic acid                                               | 0.830 | 245.326 | 145.050 | acid     | [H]- | + | + | + |
| 663 | 4-Hydroxyphenylpyruvic acid                               | 0.805 | 369.670 | 179.034 | acid     | [H]- | + | + | + |
| 664 | Shikimic acid                                             | 0.750 | 86.736  | 173.045 | acid     | [H]- | + | + | + |
| 665 | 3,4-Dihydroxymandelic acid                                | 0.738 | 26.297  | 183.029 | acid     | [H]- | + | + | + |
| 666 | Phenylacetic acid                                         | 0.730 | 205.592 | 135.044 | acid     | [H]- | + | + | + |
| 667 | trans-trans-Muconic acid                                  | 0.729 | 30.824  | 141.016 | acid     | [H]- | + | + | + |
| 668 | 3,4,5-trihydroxycyclohex-1-ene-1-carboxylic acid          | 0.702 | 105.056 | 173.045 | acid     | [H]- | + | + | + |
| 669 | cis,cis-Muconic acid                                      | 0.680 | 134.683 | 141.018 | acid     | [H]- | + | + | + |

|     |                                                      |       |         |         |        |      |   |   |   |
|-----|------------------------------------------------------|-------|---------|---------|--------|------|---|---|---|
| 670 | Syringic acid                                        | 0.674 | 85.059  | 197.045 | acid   | [H]- | + | + | + |
| 671 | Phthalic acid                                        | 0.643 | 132.115 | 165.018 | acid   | [H]- | + | + | + |
| 672 | Pyrrole-2-carboxylic acid                            | 0.577 | 174.011 | 110.024 | acid   | [H]- | + | + | + |
| 673 | Oxoadipic acid                                       | 0.568 | 73.965  | 159.029 | acid   | [H]- | + | + | + |
| 674 | Isohomovanillic acid                                 | 0.500 | 37.922  | 181.050 | acid   | [H]- | + | + | + |
| 675 | 3-(4-hydroxy-3-methoxyphenyl)prop-2-enoic acid       | 0.851 | 167.700 | 193.050 | acid   | [H]- | + | + | + |
| 676 | Formylanthranilic acid                               | 0.783 | 63.284  | 164.034 | acid   | [H]- | - | + | - |
| 677 | Phenylglyoxylic acid                                 | 0.550 | 56.198  | 149.023 | acid   | [H]- | + | + | + |
| 678 | Diaminopimelic acid                                  | 0.938 | 362.079 | 189.076 | acid   | [H]- | + | + | + |
| 679 | Homovanillic acid                                    | 0.881 | 51.639  | 181.050 | acid   | [H]- | + | + | + |
| 680 | 2-Pyrrolidineacetic acid                             | 0.995 | 65.210  | 130.086 | acid   | [H]+ | + | + | + |
| 681 | L-trans-4-Methyl-2-pyrrolidinecarboxylic acid        | 0.994 | 255.163 | 130.086 | acid   | [H]+ | + | + | + |
| 682 | m-Aminobenzoic acid                                  | 0.987 | 334.946 | 138.055 | acid   | [H]+ | + | + | + |
| 683 | D-1-Piperidine-2-carboxylic acid                     | 0.984 | 474.237 | 128.071 | acid   | [H]+ | + | + | + |
| 684 | Phosphoric acid                                      | 0.983 | 365.356 | 98.985  | acid   | [H]+ | + | + | + |
| 685 | Pipecolic acid                                       | 0.982 | 533.354 | 130.097 | acid   | [H]+ | + | + | + |
| 686 | (±)-4-Methylene-2-pyrrolidinecarboxylic acid         | 0.969 | 696.561 | 128.071 | acid   | [H]+ | + | + | + |
| 687 | 1-Pyrroline-2-carboxylic acid                        | 0.967 | 335.197 | 114.055 | acid   | [H]+ | + | + | + |
| 688 | Pi-Methylimidazoleacetic acid                        | 0.944 | 325.650 | 141.066 | acid   | [H]+ | + | + | + |
| 689 | Colubrinic acid                                      | 0.936 | 32.325  | 453.334 | acid   | [H]+ | + | + | + |
| 690 | alpha-Hydroxy-1-methyl-1H-indole-3-propanoic acid    | 0.721 | 209.956 | 220.097 | acid   | [H]+ | + | + | + |
| 691 | 3-Methyl-5-pentyl-2-furanundecanoic acid             | 0.710 | 177.354 | 337.273 | acid   | [H]+ | + | + | + |
| 692 | 1,4'-Bipiperidine-1'-carboxylic acid                 | 0.699 | 242.901 | 213.159 | acid   | [H]+ | + | + | + |
| 693 | [8]-Paradyl acetate                                  | 0.637 | 36.838  | 349.237 | acid   | [H]+ | + | + | + |
| 694 | Sebiferic acid                                       | 0.617 | 303.963 | 441.373 | acid   | [H]+ | + | + | + |
| 695 | Betulinic acid                                       | 0.601 | 253.623 | 457.367 | acid   | [H]+ | + | + | + |
| 696 | Benzoic acid                                         | 0.996 | 326.112 | 123.044 | acid   | [H]+ | + | + | + |
| 697 | 2-cis,6-trans,10-trans-Geranylgeranyl diphosphate    | 0.802 | 410.131 | 451.203 | acid   | [H]+ | - | - | + |
| 698 | L-trans-alpha-Amino-2-carboxycyclopropaneacetic acid | 0.934 | 428.155 | 160.060 | acid   | [H]+ | + | + | + |
| 699 | Pyrrolidonecarboxylic acid                           | 1.000 | 320.278 | 128.034 | acid   | [H]- | + | + | + |
| 700 | L-Dihydroorotic acid                                 | 1.000 | 321.383 | 157.024 | acid   | [H]- | + | + | + |
| 701 | Norophthalmic acid                                   | 0.581 | 437.290 | 276.119 | acid   | [H]+ | + | - | + |
| 702 | 2-Aminoheptanedioic acid                             | 0.565 | 285.538 | 176.091 | acid   | [H]+ | + | - | + |
| 703 | (R)-mandelic Acid                                    | 0.482 | 67.757  | 135.044 | acid   | [H]+ | - | + | + |
| 704 | 2',4',6'-Trihydroxyacetophenone                      | 0.894 | 158.107 | 167.034 | ketone | [H]- | + | + | + |
| 705 | 2-Piperidinone                                       | 1.000 | 55.517  | 100.076 | ketone | [H]+ | + | + | + |
| 706 | 2'-Hydroxyacetophenone                               | 0.993 | 51.036  | 137.060 | ketone | [H]+ | + | + | + |

|     |                                                                                                                |       |         |         |        |      |   |   |   |
|-----|----------------------------------------------------------------------------------------------------------------|-------|---------|---------|--------|------|---|---|---|
| 707 | Indoxyl                                                                                                        | 0.975 | 144.553 | 134.060 | ketone | [H]+ | + | + | + |
| 708 | alpha-Furyl methyl diketone                                                                                    | 0.975 | 92.524  | 139.039 | ketone | [H]+ | + | + | + |
| 709 | Aminoacetone                                                                                                   | 0.967 | 332.656 | 74.061  | ketone | [H]+ | + | + | + |
| 710 | 5-Methyl-2(3H)-furanone                                                                                        | 0.944 | 387.384 | 99.044  | ketone | [H]+ | + | + | + |
| 711 | 1H-Indole-2,3-dione                                                                                            | 0.936 | 50.202  | 148.039 | ketone | [H]+ | + | + | + |
| 712 | 5-Phenyl-1,3-oxazinane-2,4-dione                                                                               | 0.936 | 50.640  | 192.065 | ketone | [H]+ | + | + | + |
| 713 | Menthone 1,2-glyceryl ketal                                                                                    | 0.913 | 437.548 | 298.100 | ketone | [H]+ | + | + | + |
| 714 | 2-Pyrrolidinone                                                                                                | 0.912 | 394.397 | 86.061  | ketone | [H]+ | + | + | + |
| 715 | 6-[2,3-Dihydroxy-1-(hydroxymethyl)propyl]-1,2-dihydro-7-hydroxy-9-methoxy-cyclopenta[c][1]benzopyran-3,4-dione | 0.894 | 409.850 | 351.104 | ketone | [H]+ | + | + | + |
| 716 | 1-(2-Thienyl)-1-heptanone                                                                                      | 0.867 | 532.376 | 197.100 | ketone | [H]+ | + | + | + |
| 717 | 1-(1-Pyrrolidinyl)-2-butanone                                                                                  | 0.853 | 232.592 | 142.123 | ketone | [H]+ | + | + | + |
| 718 | Tetrahydro-4-hydroxy-1H-isoindole-1,3(2H)-dione                                                                | 0.774 | 86.994  | 168.065 | ketone | [H]+ | + | + | + |
| 719 | 5-Hydroxybuspirone                                                                                             | 0.761 | 403.671 | 402.245 | ketone | [H]+ | - | - | + |
| 720 | Tetrahydro-5-hydroxy-1H-isoindole-1,3(2H)-dione                                                                | 0.750 | 117.118 | 168.065 | ketone | [H]+ | + | + | + |
| 721 | 2-(5,8-Tetradecadienyl)cyclobutanone                                                                           | 0.674 | 34.991  | 263.237 | ketone | [H]+ | + | + | + |
| 722 | 3,5,7-trihydroxy-2-(4-hydroxyphenyl)-3,4-dihydro-2H-1-benzopyran-4-one                                         | 0.521 | 58.759  | 287.056 | ketone | [H]+ | + | + | - |
| 723 | 3,4-Dihydro-2H-1-benzopyran-2-one                                                                              | 0.513 | 280.690 | 149.060 | ketone | [H]+ | + | + | - |
| 724 | 3-[(3-Methylbutyl)nitrosoamino]-2-butanone                                                                     | 0.576 | 495.802 | 187.144 | ketone | [H]+ | + | + | + |
| 725 | 3alpha,4,7,7alpha-Tetrahydro-4-hydroxy-1H-isoindole-1,3(2H)-dione                                              | 0.774 | 86.994  | 168.065 | ketone | [H]+ | + | - | + |
| 726 | (3R,8E)-3-Hydroxy-5,8-megastigmadien-7-one                                                                     | 0.560 | 229.045 | 209.153 | ketone | [H]+ | + | - | + |
| 727 | Methyl jasmonate                                                                                               | 0.957 | 80.035  | 223.133 | ester  | [H]- | + | + | + |
| 728 | Methyl vanillate                                                                                               | 0.862 | 74.220  | 181.050 | ester  | [H]- | + | + | + |
| 729 | Dihydrolipoate                                                                                                 | 0.540 | 67.353  | 207.050 | ester  | [H]- | + | + | + |
| 730 | Ethylparaben                                                                                                   | 0.585 | 45.843  | 165.055 | ester  | [H]- | + | + | + |
| 731 | Erythrono-1,4-lactone                                                                                          | 0.997 | 480.902 | 117.018 | ester  | [H]- | + | + | + |
| 732 | 4-Hydroxy-2-butenic acid gamma-lactone                                                                         | 0.992 | 468.792 | 85.029  | ester  | [H]+ | + | + | + |
| 733 | Dukunolide B                                                                                                   | 0.977 | 353.105 | 499.157 | ester  | [H]+ | + | + | + |
| 734 | Phenyl salicylate                                                                                              | 0.966 | 127.193 | 215.070 | ester  | [H]+ | + | + | + |
| 735 | Thiamine monophosphate                                                                                         | 0.952 | 514.422 | 345.078 | ester  | [H]+ | + | + | + |
| 736 | Butyl 3-O-caffeoylquininate                                                                                    | 0.922 | 322.670 | 411.162 | ester  | [H]+ | + | + | + |
| 737 | Cinnamyl benzoate                                                                                              | 0.872 | 528.531 | 239.106 | ester  | [H]+ | + | + | + |

|     |                                                                   |       |         |         |       |      |   |   |   |
|-----|-------------------------------------------------------------------|-------|---------|---------|-------|------|---|---|---|
| 738 | Linalyl phenylacetate                                             | 0.828 | 36.449  | 273.184 | ester | [H]+ | + | + | + |
| 739 | Thujyl 19-trachylobanoate                                         | 0.819 | 33.929  | 439.357 | ester | [H]+ | + | + | + |
| 740 | Acetyl tributyl citrate                                           | 0.777 | 441.885 | 403.229 | ester | [H]+ | + | + | + |
| 741 | Hexyl heptanoate                                                  | 0.749 | 475.681 | 639.245 | ester | [H]+ | - | + | - |
| 742 | Alantolactone                                                     | 0.727 | 52.502  | 233.149 | ester | [H]+ | + | + | + |
| 743 | 3-Hydroxyadipic acid 3,6-lactone                                  | 0.705 | 387.277 | 145.050 | ester | [H]+ | + | + | + |
| 744 | Butyl levulinate                                                  | 0.694 | 36.855  | 173.117 | ester | [H]+ | + | + | + |
| 745 | 3-Methylbutyl 2-furanbutanoate                                    | 0.657 | 208.097 | 225.148 | ester | [H]+ | + | + | + |
| 746 | 8-Ocimenyl acetate                                                | 0.620 | 207.372 | 195.138 | ester | [H]+ | + | + | + |
| 747 | 2-Carboxy-4-dodecanolide                                          | 0.614 | 207.351 | 243.159 | ester | [H]+ | + | + | + |
| 748 | 2-Hydroxyethanesulfonate                                          | 0.969 | 149.026 | 124.990 | other | [H]- | + | + | + |
| 749 | 1,2,3-Trihydroxybenzene                                           | 0.949 | 477.273 | 125.023 | other | [H]- | + | + | + |
| 750 | Hydrogen phosphate                                                | 0.929 | 177.417 | 96.969  | other | [H]- | + | + | + |
| 751 | Indolelactic acid                                                 | 0.926 | 199.154 | 204.066 | other | [H]- | + | + | + |
| 752 | p-Hydroxymandelic acid                                            | 0.922 | 32.998  | 167.037 | other | [H]- | + | + | + |
| 753 | (-)-Gossypol                                                      | 0.856 | 465.040 | 517.189 | other | [H]- | + | + | + |
| 754 | Meconine                                                          | 0.832 | 216.772 | 193.050 | other | [H]- | + | + | + |
| 755 | Hypogeic acid                                                     | 0.803 | 38.051  | 253.217 | other | [H]- | + | + | + |
| 756 | Oxazepam                                                          | 0.778 | 51.934  | 285.040 | other | [H]- | + | + | + |
| 757 | 5,7-dihydroxy-6-methoxy-2-phenyl<br>-4H-chromen-4-one             | 0.774 | 184.010 | 283.051 | other | [H]- | + | + | + |
| 758 | N1-(2-Hydroxyethyl)flurazepam                                     | 0.746 | 182.110 | 331.067 | other | [H]- | + | + | + |
| 759 | Aflatoxin B1                                                      | 0.710 | 152.216 | 311.054 | other | [H]- | + | + | + |
| 760 | Bilirubin                                                         | 0.499 | 300.828 | 583.260 | other | [H]- | + | + | + |
| 761 | alpha-Mangostin                                                   | 0.459 | 295.024 | 409.165 | other | [H]- | + | + | + |
| 762 | Dopamine                                                          | 0.447 | 310.717 | 299.077 | other | [H]- | + | + | + |
| 763 | (1R,2S,3R)-2-Acetyl-4(5)-(1,2,3,4-<br>tetrahydroxybutyl)imidazole | 0.344 | 440.998 | 229.082 | other | [H]- | + | - | + |
| 764 | Methylgingerol                                                    | 0.544 | 38.908  | 307.191 | other | [H]- | + | + | - |
| 765 | 2-Hydroxypyridine                                                 | 0.999 | 52.794  | 96.045  | other | [H]+ | + | + | + |
| 766 | 1-Butylamine                                                      | 0.999 | 52.850  | 74.097  | other | [H]+ | + | + | + |
| 767 | Protoanemonin                                                     | 0.998 | 517.104 | 97.029  | other | [H]+ | + | + | + |
| 768 | Choline                                                           | 0.998 | 271.064 | 104.107 | other | [H]+ | + | + | + |
| 769 | Dukunolide A                                                      | 0.997 | 344.110 | 483.163 | other | [H]+ | + | + | + |
| 770 | 3-Amino-2-piperidone                                              | 0.997 | 218.187 | 115.087 | other | [H]+ | + | + | + |
| 771 | 5-Oxo-2(5H)-isoxazolepropanenitri<br>le                           | 0.995 | 199.257 | 139.050 | other | [H]+ | + | + | + |
| 772 | Nervonyl carnitine                                                | 0.994 | 37.261  | 102.128 | other | [H]+ | + | + | + |
| 773 | 2,6-Dimethylpyrazine                                              | 0.993 | 553.990 | 109.076 | other | [H]+ | + | + | + |
| 774 | Epsilon-caprolactam                                               | 0.993 | 51.028  | 114.092 | other | [H]+ | + | + | + |
| 775 | Acetylcholine                                                     | 0.993 | 196.998 | 146.117 | other | [H]+ | + | + | + |
| 776 | Phosphorylcholine                                                 | 0.993 | 552.038 | 184.073 | other | [H]+ | + | + | + |
| 777 | 2-Aminonaphthalene                                                | 0.991 | 285.047 | 144.081 | other | [H]+ | + | + | + |
| 778 | Methylpyrazine                                                    | 0.990 | 401.959 | 95.061  | other | [H]+ | + | + | + |



|     |                                                               |       |         |         |       |      |   |   |   |
|-----|---------------------------------------------------------------|-------|---------|---------|-------|------|---|---|---|
| 779 | Creatinine                                                    | 0.985 | 21.361  | 114.066 | other | [H]+ | + | + | + |
| 780 | 5-(2-Hydroxyethyl)-4-methylthiazole                           | 0.985 | 48.170  | 144.048 | other | [H]+ | + | + | + |
| 781 | N,N-Dimethylformamide                                         | 0.982 | 90.747  | 74.061  | other | [H]+ | + | + | + |
| 782 | 7-Hydroxymethyl-12-methylbenz[a]anthracene sulfate            | 0.977 | 70.362  | 353.084 | other | [H]+ | + | + | + |
| 783 | 3-Indoleacetonitrile                                          | 0.967 | 52.894  | 157.076 | other | [H]+ | + | + | + |
| 784 | Harderoporphyrim                                              | 0.966 | 76.226  | 609.270 | other | [H]+ | + | + | + |
| 785 | (+)-2,3-Dihydro-3-methyl-1H-pyrrole                           | 0.961 | 202.707 | 84.081  | other | [H]+ | + | + | + |
| 786 | 2,3-Dihydro-5-(3-hydroxypropionyl)-1H-pyrrolizine             | 0.958 | 53.723  | 180.102 | other | [H]+ | + | + | + |
| 787 | 1,2,6,8-Tetrahydroxy-3-methylanthraquinone 2-O-b-D-glucoside  | 0.958 | 497.748 | 449.106 | other | [H]+ | + | + | + |
| 788 | 2,3,4,5-Tetrahydropiperidine-2-carboxylate                    | 0.956 | 619.807 | 128.071 | other | [H]+ | + | + | + |
| 789 | 5-Acetyl-2,4-dimethyloxazole                                  | 0.955 | 61.665  | 140.070 | other | [H]+ | + | + | + |
| 790 | Isobutylpropylamine                                           | 0.950 | 188.802 | 116.144 | other | [H]+ | + | + | + |
| 791 | Histamine                                                     | 0.945 | 302.632 | 112.087 | other | [H]+ | + | + | + |
| 792 | 1-Nitroheptane                                                | 0.945 | 37.014  | 146.117 | other | [H]+ | + | + | + |
| 793 | O-Acetyethanolamine                                           | 0.943 | 365.994 | 104.071 | other | [H]+ | + | + | + |
| 794 | Metenamine                                                    | 0.942 | 305.217 | 141.102 | other | [H]+ | + | + | + |
| 795 | 2-Methylbutylamine                                            | 0.936 | 264.735 | 88.113  | other | [H]+ | + | + | + |
| 796 | Ethylbenzene                                                  | 0.931 | 34.995  | 107.086 | other | [H]+ | + | + | + |
| 797 | N,N-Dimethylaniline                                           | 0.931 | 184.003 | 122.097 | other | [H]+ | + | + | + |
| 798 | 3-Methyl-1-butylamine                                         | 0.931 | 205.542 | 88.113  | other | [H]+ | + | + | + |
| 799 | L-Carnitine                                                   | 0.926 | 324.078 | 162.112 | other | [H]+ | + | + | + |
| 800 | 2-(4-Methyl-1,3-pentadienyl)anthraquinone                     | 0.920 | 202.718 | 289.125 | other | [H]+ | + | + | + |
| 801 | Nandrolone                                                    | 0.914 | 56.180  | 275.200 | other | [H]+ | + | + | + |
| 802 | Dinoseb acetate                                               | 0.901 | 397.418 | 283.090 | other | [H]+ | + | + | + |
| 803 | Sulfamethoxazole<br>N4-hydroxylamine                          | 0.898 | 83.156  | 270.052 | other | [H]+ | + | + | + |
| 804 | Annoglabasin A                                                | 0.890 | 36.819  | 391.245 | other | [H]+ | + | - | - |
| 805 | Triethanolamine                                               | 0.890 | 151.663 | 150.112 | other | [H]+ | + | + | + |
| 806 | Dukunolide C                                                  | 0.888 | 489.688 | 541.173 | other | [H]+ | + | + | + |
| 807 | Squamolone                                                    | 0.887 | 383.699 | 129.066 | other | [H]+ | + | + | + |
| 808 | 7-(1,3-Cyclohexadienyl)-5-hydroxy-2,6-dimethyl-2-hepten-4-one | 0.875 | 120.083 | 235.169 | other | [H]+ | + | + | + |
| 809 | Carnosine                                                     | 0.873 | 363.807 | 227.113 | other | [H]+ | + | + | + |
| 810 | Serotonin                                                     | 0.872 | 140.136 | 177.102 | other | [H]+ | + | + | + |
| 811 | Leontogenin                                                   | 0.867 | 32.949  | 447.311 | other | [H]+ | + | + | + |
| 812 | Pentanenitrile                                                | 0.865 | 410.756 | 84.081  | other | [H]+ | + | + | + |
| 813 | 2-Methyl-1-hydroxybutyl-ThPP                                  | 0.863 | 83.828  | 511.121 | other | [H]+ | - | + | + |

|     |                                                       |       |         |         |       |      |   |   |   |
|-----|-------------------------------------------------------|-------|---------|---------|-------|------|---|---|---|
| 814 | 1-Methyl-1,3-cyclohexadiene                           | 0.863 | 221.665 | 95.086  | other | [H]+ | + | + | + |
| 815 | Corticosterone                                        | 0.862 | 47.057  | 347.222 | other | [H]+ | + | + | - |
| 816 | 3-O-Methylniveusin A                                  | 0.858 | 138.785 | 409.183 | other | [H]+ | + | + | + |
| 817 | Adrenosterone                                         | 0.854 | 199.371 | 301.179 | other | [H]+ | + | + | + |
| 818 | 1-Cyano-2-hydroxy-3-butene                            | 0.840 | 424.858 | 98.060  | other | [H]+ | + | + | + |
| 819 | Caffeine                                              | 0.832 | 242.160 | 195.087 | other | [H]+ | + | + | + |
| 820 | 6,7-Dimethyl-8-(1-D-ribityl)lumazine                  | 0.824 | 384.333 | 327.127 | other | [H]+ | + | + | - |
| 821 | 1-Isothiocyanato-7-(methylthio)heptane                | 0.819 | 420.473 | 204.087 | other | [H]+ | + | + | + |
| 822 | Allixin                                               | 0.806 | 56.300  | 227.127 | other | [H]+ | + | + | + |
| 823 | 22-Acetylpriverogenin B                               | 0.798 | 32.194  | 517.388 | other | [H]+ | + | + | + |
| 824 | 2-Acetylpyrrolidine                                   | 0.795 | 127.004 | 114.092 | other | [H]+ | + | + | + |
| 825 | 4-Acetyl-3-methylpyridine                             | 0.791 | 231.457 | 136.076 | other | [H]+ | + | + | + |
| 826 | Desloratadine                                         | 0.787 | 158.624 | 311.127 | other | [H]+ | + | + | + |
| 827 | Momordin I                                            | 0.786 | 245.646 | 765.442 | other | [H]+ | + | + | + |
| 828 | 8-Hexanoylneosolaniol                                 | 0.783 | 398.337 | 481.240 | other | [H]+ | + | + | + |
| 829 | Sterebin D                                            | 0.781 | 199.265 | 295.227 | other | [H]+ | + | - | - |
| 830 | 2-Phenylacetamide                                     | 0.774 | 83.512  | 136.076 | other | [H]+ | + | + | + |
| 831 | 6-Chloro-N-(1-methylethyl)-1,3,5-triazine-2,4-diamine | 0.773 | 285.089 | 188.070 | other | [H]+ | + | + | + |
| 832 | Glucopyranosylmoranoline                              | 0.772 | 246.063 | 326.147 | other | [H]+ | + | + | + |
| 833 | gamma-Calacorene                                      | 0.768 | 153.588 | 201.164 | other | [H]+ | + | + | + |
| 834 | Cyclotetradecane                                      | 0.765 | 220.481 | 227.175 | other | [H]+ | - | + | + |
| 835 | 3-Isovalidene-3alpha,4-dihydrophthalide               | 0.763 | 177.831 | 205.122 | other | [H]+ | + | + | + |
| 836 | 9-(beta-D-Ribofuranosyl)zeatin                        | 0.762 | 136.573 | 352.160 | other | [H]+ | - | - | + |
| 837 | Dihydrotestosterone                                   | 0.756 | 31.617  | 291.231 | other | [H]+ | + | + | + |
| 838 | N-Acetyl-2,3-dihydro-1H-pyrrole                       | 0.750 | 537.665 | 112.076 | other | [H]+ | + | + | + |
| 839 | 5-(2-Furanyl)-3,4-dihydro-2H-pyrrole                  | 0.746 | 103.907 | 136.076 | other | [H]+ | + | + | + |
| 840 | L-Furosine                                            | 0.746 | 447.160 | 255.133 | other | [H]+ | + | + | + |
| 841 | O-Methylsomniaferine                                  | 0.739 | 455.655 | 623.278 | other | [H]+ | - | + | - |
| 842 | N'-Hydroxymethylnorcotinine                           | 0.734 | 64.419  | 193.097 | other | [H]+ | + | + | - |
| 843 | Pregnanetriol                                         | 0.733 | 36.989  | 337.273 | other | [H]+ | + | + | + |
| 844 | Pterosin O                                            | 0.732 | 108.710 | 233.149 | other | [H]+ | + | + | - |
| 845 | Quinceoxepine                                         | 0.732 | 36.873  | 179.143 | other | [H]+ | + | + | + |
| 846 | Ustiloxin D                                           | 0.730 | 493.107 | 495.242 | other | [H]+ | + | - | - |
| 847 | beta-Sitosterol                                       | 0.722 | 33.703  | 397.382 | other | [H]+ | + | + | + |
| 848 | Pyrrolidine                                           | 0.713 | 219.006 | 72.081  | other | [H]+ | + | + | + |
| 849 | Alitame                                               | 0.706 | 375.517 | 332.166 | other | [H]+ | - | - | + |
| 850 | Ipomeabisfuran                                        | 0.699 | 105.992 | 247.132 | other | [H]+ | + | + | + |
| 851 | Bisacurone epoxide                                    | 0.697 | 57.045  | 269.174 | other | [H]+ | + | + | + |
| 852 | Sandoricin                                            | 0.696 | 467.253 | 589.256 | other | [H]+ | - | + | - |

|     |                                                                                                        |       |         |         |       |      |   |   |   |
|-----|--------------------------------------------------------------------------------------------------------|-------|---------|---------|-------|------|---|---|---|
| 853 | 7a-Hydroxy-cholestene-3-one                                                                            | 0.696 | 33.351  | 401.341 | other | [H]+ | + | + | + |
| 854 | Tetrahydrodeoxycorticosterone                                                                          | 0.696 | 183.239 | 335.257 | other | [H]+ | + | + | + |
| 855 | Mulberrofuran E                                                                                        | 0.691 | 492.949 | 633.246 | other | [H]+ | + | + | + |
| 856 | Kyotorphin                                                                                             | 0.682 | 372.296 | 338.182 | other | [H]+ | + | + | + |
| 857 | Eremopetasinorone A                                                                                    | 0.676 | 155.032 | 207.138 | other | [H]+ | + | + | + |
| 858 | Questinol                                                                                              | 0.672 | 132.959 | 301.070 | other | [H]+ | + | + | + |
| 859 | Methoxypyrazine                                                                                        | 0.668 | 185.179 | 111.055 | other | [H]+ | + | + | + |
| 860 | Porphobilinogen                                                                                        | 0.662 | 309.847 | 227.102 | other | [H]+ | + | + | + |
| 861 | N-Nitroso-pyrrolidine                                                                                  | 0.624 | 358.758 | 101.071 | other | [H]+ | + | + | + |
| 862 | N'-Hydroxyneosaxitoxin                                                                                 | 0.608 | 303.192 | 332.134 | other | [H]+ | + | + | + |
| 863 | Salsolinol                                                                                             | 0.606 | 36.878  | 180.102 | other | [H]+ | + | + | + |
| 864 | 6-Hydroxydopamine                                                                                      | 0.604 | 60.781  | 170.081 | other | [H]+ | + | + | + |
| 865 | 1-Pyrroline                                                                                            | 0.999 | 331.963 | 70.066  | other | [H]+ | + | + | + |
| 866 | 2,5-Dihydro-2,4-dimethyloxazole                                                                        | 0.996 | 41.278  | 100.076 | other | [H]+ | + | + | + |
| 867 | 1,3-Dihydro-(2H)-indol-2-one                                                                           | 0.994 | 249.072 | 134.060 | other | [H]+ | + | + | + |
| 868 | Testosterone                                                                                           | 0.885 | 33.281  | 289.216 | other | [H]+ | + | + | + |
| 869 | Clionasterol                                                                                           | 0.862 | 76.645  | 397.382 | other | [H]+ | + | + | - |
| 870 | Theaspirone A                                                                                          | 0.710 | 197.130 | 209.153 | other | [H]+ | + | + | + |
| 871 | Cyclocalopin D                                                                                         | 0.806 | 361.359 | 517.190 | other | [H]+ | + | - | - |
| 872 | 4,4alpha,5,6-Tetrahydro-7-methyl-2(3H)-naphthalenone                                                   | 0.954 | 121.903 | 163.112 | other | [H]+ | + | + | + |
| 873 | Niacinamide                                                                                            | 0.995 | 60.806  | 123.055 | other | [H]+ | + | + | + |
| 874 | (2E)-Decenoyl-ACP                                                                                      | 0.997 | 330.615 | 128.070 | other | [H]- | + | + | + |
| 875 | Isobutyrylglycine                                                                                      | 0.989 | 231.568 | 144.065 | other | [H]- | - | - | + |
| 876 | 2,4,6-trihydroxy-2-[(4-hydroxyphenyl)methyl]-2,3-dihydro-1-benzofuran-3-one                            | 0.988 | 293.589 | 271.060 | other | [H]+ | + | + | + |
| 877 | Aflatoxin G2                                                                                           | 0.879 | 121.020 | 331.080 | other | [H]- | + | + | + |
| 878 | Diplodiatoxin                                                                                          | 0.645 | 104.406 | 309.205 | other | [H]- | + | + | + |
| 879 | Benzofuran                                                                                             | 0.536 | 325.574 | 119.049 | other | [H]- | + | + | + |
| 880 | (±)-Conen                                                                                              | 0.629 | 429.360 | 305.076 | other | [H]- | + | + | + |
| 881 | 1-(beta-D-Ribofuranosyl)-1,4-dihydro-5-pyridin-2(1H)-one                                               | 0.590 | 176.033 | 257.113 | other | [H]+ | - | + | + |
| 882 | 3,11,12-Trihydroxy-1(10)-spirovetiven-2-one                                                            | 0.561 | 37.691  | 269.174 | other | [H]- | + | + | + |
| 883 | Phosphoribosylformamidocarboxamide                                                                     | 0.595 | 418.300 | 367.062 | other | [H]+ | + | + | + |
| 884 | 2-(3,4-dihydroxyphenyl)-5,7-dihydroxy-6-[3,4,5-trihydroxy-6-(hydroxymethyl)oxan-2-yl]-4H-chromen-4-one | 0.675 | 278.916 | 449.107 | other | [H]+ | + | + | + |
| 885 | Capsiate                                                                                               | 0.838 | 58.911  | 307.189 | other | [H]+ | + | + | - |
| 886 | 2-Methoxy-3-methylpyrazine                                                                             | 0.796 | 54.950  | 125.071 | other | [H]+ | + | + | - |
| 887 | Herierin IV                                                                                            | 0.391 | 180.397 | 171.065 | other | [H]+ | + | + | - |

|     |                |       |         |         |       |                  |   |   |   |
|-----|----------------|-------|---------|---------|-------|------------------|---|---|---|
| 888 | Beta-Carboline | 0.918 | 50.130  | 169.076 | other | [H] <sup>+</sup> | + | + | + |
| 889 | Oroslone       | 0.752 | 160.403 | 227.070 | other | [H] <sup>+</sup> | + | + | - |

Note: score represents the matching degree of metabolites and substances in the database; rt is retention time (s); m/z is mass-to-nucleus ratio; Classification is the classification of metabolites; Ion mode is the ion mode of metabolites scanned in mass spectrometry; "+" means containing the metabolite, "-" means less than containing the metabolite.

**Table S2 List of differential metabolites between unprocessed black soybeans and cooked black soybeans**

|    | Name                                   | score | rt       | mz      | MEAN r   | MEAN p   | VIP   | P-VAL<br>UE | Q-VA<br>LUE | FOLD<br>CHANGE | LOG_FO<br>LDCHA<br>NGE |
|----|----------------------------------------|-------|----------|---------|----------|----------|-------|-------------|-------------|----------------|------------------------|
| 1  | Methionyl-Valine                       | 0.528 | 226.046  | 249.126 | 3.36E-06 | 6.61E-08 | 2.763 | 0.0488      | 0.0222      | 50.882         | 5.669                  |
| 2  | L-Asparagine                           | 0.993 | 398.701  | 131.045 | 1.02E-04 | 2.91E-06 | 3.005 | 0.0017      | 0.0052      | 35.114         | 5.134                  |
| 3  | Tyrosyl-Tryptophan                     | 0.768 | 229.66   | 368.160 | 4.31E-06 | 3.97E-07 | 2.206 | 0.0010      | 0.0015      | 10.860         | 3.441                  |
| 4  | Histidiny-Methionine                   | 0.765 | 323.48   | 287.117 | 1.82E-05 | 1.93E-06 | 2.096 | 0.0155      | 0.0078      | 9.444          | 3.239                  |
| 5  | Valyl-Tryptophan                       | 0.571 | 217.277  | 304.165 | 5.51E-06 | 8.89E-07 | 1.999 | 0.0016      | 0.0015      | 6.195          | 2.631                  |
| 6  | Glycitein                              | 0.939 | 260.086  | 283.061 | 3.14E-03 | 5.68E-04 | 1.765 | 0.0299      | 0.0131      | 5.526          | 2.466                  |
| 7  | Phenylalanyl-Gamma-glutamate           | 0.710 | 283.277  | 294.145 | 4.27E-06 | 8.77E-07 | 1.701 | 0.0306      | 0.0146      | 4.863          | 2.282                  |
| 8  | Valyl-Threonine                        | 0.781 | 242.901  | 219.134 | 2.84E-04 | 6.61E-05 | 1.654 | 0.0073      | 0.0039      | 4.298          | 2.104                  |
| 9  | Leucyl-Tyrosine                        | 0.932 | 231.431  | 295.165 | 3.26E-05 | 8.07E-06 | 1.652 | 0.0001      | 0.0011      | 4.035          | 2.013                  |
| 10 | Prolyl-Glutamine                       | 0.845 | 367.5175 | 244.129 | 5.44E-06 | 1.61E-06 | 1.532 | 0.0020      | 0.0015      | 3.389          | 1.761                  |
| 11 | Cysteinyl-Proline                      | 0.634 | 235.104  | 219.079 | 6.52E-04 | 2.16E-04 | 1.395 | 0.0255      | 0.0123      | 3.014          | 1.592                  |
| 12 | Alanyl-Leucine                         | 0.988 | 253.423  | 203.139 | 6.17E-05 | 2.19E-05 | 1.447 | 0.0450      | 0.0206      | 2.823          | 1.497                  |
| 13 | N-Acetyl-L-methionine                  | 0.938 | 224.008  | 190.053 | 9.09E-06 | 3.25E-06 | 1.350 | 0.0437      | 0.0183      | 2.800          | 1.485                  |
| 14 | Tyrosyl-Threonine                      | 0.820 | 281.5605 | 283.128 | 8.92E-06 | 3.25E-06 | 1.387 | 0.0035      | 0.0020      | 2.746          | 1.457                  |
| 15 | D-Glutamine                            | 0.990 | 395.613  | 147.076 | 3.65E-04 | 1.44E-04 | 1.342 | 0.0008      | 0.0015      | 2.540          | 1.345                  |
| 16 | Prolyl-Lysine                          | 0.684 | 451.9705 | 244.165 | 1.07E-05 | 4.52E-06 | 1.203 | 0.0345      | 0.0163      | 2.364          | 1.241                  |
| 17 | Isoleucyl-Serine                       | 0.984 | 281.5655 | 219.133 | 1.16E-04 | 5.20E-05 | 1.206 | 0.0098      | 0.0052      | 2.239          | 1.163                  |
| 18 | Isoleucyl-Tryptophan                   | 0.643 | 210.846  | 318.181 | 4.93E-05 | 2.21E-05 | 1.234 | 0.0011      | 0.0015      | 2.230          | 1.157                  |
| 19 | L-Glutamic acid                        | 0.993 | 417.911  | 146.045 | 3.09E-03 | 1.61E-03 | 1.086 | 0.0015      | 0.0050      | 1.917          | 0.939                  |
| 20 | L-Proline                              | 0.999 | 333.297  | 114.055 | 3.17E-04 | 1.72E-04 | 1.066 | 0.0017      | 0.0052      | 1.841          | 0.880                  |
| 21 | N-Carboxyethyl-g-aminobutyric acid     | 0.702 | 288.1005 | 174.076 | 5.72E-04 | 3.16E-04 | 1.032 | 0.0029      | 0.0060      | 1.811          | 0.857                  |
| 22 | 4',8-Dimethylgossypetin 3-glucoside    | 0.498 | 180.767  | 509.129 | 1.10E-05 | 6.61E-08 | 3.177 | 0.0099      | 0.0052      | 166.152        | 7.376                  |
| 23 | Hydroxytyrosol 1-O-glucoside           | 0.841 | 204.0725 | 317.126 | 9.47E-06 | 3.39E-07 | 2.607 | 0.0000      | 0.0010      | 27.964         | 4.805                  |
| 24 | Threonic acid                          | 0.915 | 334.521  | 135.029 | 4.46E-04 | 1.11E-04 | 1.601 | 0.0167      | 0.0078      | 4.033          | 2.012                  |
| 25 | Chrysoeriol 7-O-(6"-malonyl-glucoside) | 0.590 | 236.0205 | 549.123 | 4.26E-05 | 1.29E-05 | 1.495 | 0.0022      | 0.0015      | 3.294          | 1.720                  |
| 26 | Gluconolactone                         | 0.653 | 123.32   | 177.039 | 1.96E-04 | 6.55E-05 | 1.402 | 0.0028      | 0.0059      | 2.989          | 1.580                  |
| 27 | 4-Methoxybenzyl glucoside              | 0.469 | 141.8605 | 301.129 | 4.21E-05 | 1.62E-05 | 1.342 | 0.0074      | 0.0040      | 2.600          | 1.379                  |
| 28 | Gluconic acid                          | 0.913 | 396.52   | 195.050 | 2.46E-03 | 9.73E-04 | 1.294 | 0.0029      | 0.0060      | 2.528          | 1.338                  |
| 29 | Rhamnose                               | 0.782 | 151.2155 | 163.060 | 1.60E-04 | 6.46E-05 | 1.300 | 0.0001      | 0.0009      | 2.479          | 1.310                  |
| 30 | L-Iditol                               | 0.954 | 309.838  | 181.071 | 1.32E-03 | 6.34E-04 | 1.151 | 0.0008      | 0.0039      | 2.074          | 1.052                  |
| 31 | L-Arabitol                             | 0.993 | 97.7975  | 151.060 | 1.81E-04 | 9.47E-05 | 1.088 | 0.0007      | 0.0036      | 1.906          | 0.931                  |
| 32 | Deacetylisovaltrate                    | 0.763 | 396.479  | 381.188 | 1.42E-05 | 6.61E-08 | 3.253 | 0.0181      | 0.0091      | 214.890        | 7.747                  |
| 33 | Methylsuccinic acid                    | 0.984 | 374.444  | 131.034 | 5.79E-05 | 1.29E-05 | 1.899 | 0.0109      | 0.0071      | 4.502          | 2.170                  |
| 34 | Leucinic acid                          | 0.998 | 137.152  | 131.070 | 3.05E-03 | 7.95E-04 | 1.575 | 0.0096      | 0.0070      | 3.832          | 1.938                  |
| 35 | Traumatic acid                         | 0.862 | 241.441  | 227.128 | 3.63E-04 | 9.83E-05 | 1.562 | 0.0000      | 0.0004      | 3.697          | 1.886                  |

|    |                                                                                                                                |       |          |         |          |          |       |        |        |         |       |
|----|--------------------------------------------------------------------------------------------------------------------------------|-------|----------|---------|----------|----------|-------|--------|--------|---------|-------|
| 36 | 20-Hydroxy-PGE2                                                                                                                | 0.998 | 107.796  | 351.213 | 6.15E-06 | 2.34E-06 | 1.336 | 0.0138 | 0.0071 | 2.625   | 1.392 |
| 37 | 3,3-Dimethylglutaric acid                                                                                                      | 0.680 | 65.1768  | 159.065 | 3.07E-04 | 1.29E-04 | 1.229 | 0.0114 | 0.0071 | 2.385   | 1.254 |
| 38 | L-Acetylcarnitine                                                                                                              | 0.755 | 406.107  | 204.123 | 2.89E-04 | 1.38E-04 | 1.204 | 0.0001 | 0.0010 | 2.091   | 1.065 |
| 39 | Itaconic acid                                                                                                                  | 0.973 | 66.82765 | 129.018 | 1.22E-03 | 6.06E-04 | 1.130 | 0.0008 | 0.0039 | 2.018   | 1.013 |
| 40 | 9,10-DHOME                                                                                                                     | 0.948 | 65.54665 | 313.238 | 1.08E-04 | 5.57E-05 | 1.073 | 0.0058 | 0.0067 | 1.942   | 0.958 |
| 41 | (2'E,4'Z,7'Z,8E)-Colnelenic acid                                                                                               | 0.703 | 63.3459  | 293.211 | 1.41E-05 | 4.86E-06 | 1.593 | 0.0229 | 0.0112 | 2.906   | 1.539 |
| 42 | Panaquinquecol 1                                                                                                               | 0.653 | 203.871  | 293.211 | 1.32E-06 | 1.53E-07 | 2.097 | 0.0041 | 0.0023 | 8.653   | 3.113 |
| 43 | Glycerol 3-phosphate                                                                                                           | 0.849 | 453.589  | 171.005 | 9.49E-05 | 9.58E-08 | 3.591 | 0.0016 | 0.0051 | 990.184 | 9.952 |
| 44 | 5-Heptyltetrahydro-2-oxo-3-furan<br>carboxylic acid                                                                            | 0.525 | 58.1361  | 229.143 | 1.41E-05 | 5.47E-06 | 1.344 | 0.0233 | 0.0114 | 2.577   | 1.365 |
| 45 | Daidzein                                                                                                                       | 0.999 | 260.581  | 253.050 | 8.78E-03 | 3.80E-03 | 1.247 | 0.0001 | 0.0012 | 2.312   | 1.209 |
| 46 | 5,7-Dihydroxy-2',6-dimethoxyiso<br>flavone 7-rhamnoside                                                                        | 0.541 | 190.466  | 461.144 | 5.88E-04 | 2.06E-04 | 1.427 | 0.0138 | 0.0071 | 2.846   | 1.509 |
| 47 | Luteolin 7-galactoside                                                                                                         | 0.944 | 241.71   | 449.107 | 4.30E-03 | 5.76E-05 | 2.921 | 0.0075 | 0.0040 | 74.630  | 6.222 |
| 48 | Cosmosiin                                                                                                                      | 0.996 | 201.8385 | 433.112 | 3.31E-03 | 6.75E-05 | 2.771 | 0.0121 | 0.0063 | 49.088  | 5.617 |
| 49 | Trilobatin                                                                                                                     | 0.865 | 202.976  | 437.143 | 1.22E-05 | 3.78E-07 | 2.674 | 0.0083 | 0.0044 | 32.225  | 5.010 |
| 50 | Luteolin 4'-glucoside                                                                                                          | 0.971 | 523.336  | 449.107 | 1.42E-03 | 7.40E-05 | 2.410 | 0.0497 | 0.0226 | 19.161  | 4.260 |
| 51 | Luteolin                                                                                                                       | 0.994 | 521.279  | 287.054 | 1.53E-04 | 9.65E-06 | 2.364 | 0.0101 | 0.0053 | 15.882  | 3.989 |
| 52 | Peonidin-3-glucoside                                                                                                           | 0.990 | 153.4245 | 463.123 | 3.02E-04 | 2.66E-05 | 2.199 | 0.0001 | 0.0011 | 11.320  | 3.501 |
| 53 | Citrusinine II                                                                                                                 | 0.448 | 60.7817  | 288.086 | 5.56E-04 | 5.52E-05 | 2.132 | 0.0006 | 0.0014 | 10.071  | 3.332 |
| 54 | Isorhamnetin                                                                                                                   | 0.981 | 192.786  | 317.066 | 1.49E-04 | 1.85E-05 | 2.030 | 0.0000 | 0.0004 | 8.047   | 3.008 |
| 55 | Sideritiflavone                                                                                                                | 0.989 | 102.9545 | 361.091 | 2.97E-05 | 4.48E-06 | 1.928 | 0.0001 | 0.0012 | 6.632   | 2.730 |
| 56 | 5,7-dihydroxy-2-(4-hydroxy-3-m<br>ethoxyphenyl)-3- {[3,4,5-trihydro<br>xy-6-(hydroxymethyl)oxan-2-yl]o<br>xy}-4H-chromen-4-one | 0.782 | 179.7965 | 477.104 | 8.49E-05 | 2.03E-05 | 1.622 | 0.0014 | 0.0049 | 4.180   | 2.064 |
| 57 | (-)-Epiafzelechin                                                                                                              | 0.962 | 58.12795 | 273.076 | 3.78E-03 | 9.48E-04 | 1.605 | 0.0001 | 0.0009 | 3.988   | 1.996 |
| 58 | Phlorizin                                                                                                                      | 0.351 | 225.4325 | 435.130 | 1.22E-04 | 5.31E-05 | 1.242 | 0.0002 | 0.0016 | 2.297   | 1.200 |
| 59 | Norizalpinin                                                                                                                   | 0.754 | 294.63   | 269.045 | 1.00E-04 | 4.97E-05 | 1.127 | 0.0015 | 0.0050 | 2.019   | 1.014 |
| 60 | Carthamone                                                                                                                     | 0.959 | 475.95   | 449.107 | 8.95E-04 | 5.01E-05 | 2.404 | 0.0003 | 0.0014 | 17.878  | 4.160 |
| 61 | 3,4-Dihydroxyhydrocinnamic<br>acid                                                                                             | 0.842 | 96.2775  | 181.050 | 2.21E-04 | 8.88E-05 | 1.254 | 0.0119 | 0.0071 | 2.486   | 1.314 |
| 62 | Marmesin                                                                                                                       | 0.897 | 136.361  | 245.082 | 1.01E-04 | 2.87E-05 | 1.513 | 0.0024 | 0.0057 | 3.523   | 1.817 |
| 63 | Protocatechuic acid                                                                                                            | 0.812 | 39.59395 | 153.018 | 3.19E-03 | 2.94E-04 | 2.076 | 0.0405 | 0.0172 | 10.864  | 3.441 |
| 64 | Phenol                                                                                                                         | 0.866 | 325.5565 | 95.050  | 9.66E-06 | 1.39E-06 | 2.384 | 0.0052 | 0.0029 | 6.946   | 2.796 |
| 65 | Acetaminophen                                                                                                                  | 0.937 | 102.583  | 152.070 | 4.21E-04 | 1.45E-04 | 1.432 | 0.0027 | 0.0015 | 2.912   | 1.542 |
| 66 | Gallic acid                                                                                                                    | 0.649 | 32.8544  | 169.013 | 2.62E-04 | 9.42E-05 | 1.381 | 0.0001 | 0.0009 | 2.787   | 1.479 |
| 67 | benzene-1,2,4-triol                                                                                                            | 0.967 | 392.763  | 125.023 | 2.17E-04 | 1.25E-04 | 1.003 | 0.0009 | 0.0042 | 1.739   | 0.798 |
| 68 | Inosine                                                                                                                        | 0.999 | 237.5    | 269.087 | 7.63E-06 | 2.43E-06 | 1.478 | 0.0083 | 0.0044 | 3.145   | 1.653 |
| 69 | Cytidine 2'-phosphate                                                                                                          | 0.997 | 456.9355 | 324.059 | 4.29E-05 | 1.41E-05 | 1.449 | 0.0058 | 0.0032 | 3.039   | 1.604 |
| 70 | Cytidine                                                                                                                       | 0.985 | 261.061  | 242.078 | 1.55E-05 | 6.96E-06 | 1.174 | 0.0086 | 0.0070 | 2.222   | 1.152 |
| 71 | 2'-O-Methyladenosine                                                                                                           | 0.997 | 99.726   | 282.120 | 1.60E-04 | 7.37E-05 | 1.228 | 0.0004 | 0.0014 | 2.178   | 1.123 |
| 72 | Ribitol                                                                                                                        | 0.854 | 248.9835 | 151.060 | 3.88E-04 | 1.91E-04 | 1.142 | 0.0005 | 0.0029 | 2.035   | 1.025 |
| 73 | Cytarabine                                                                                                                     | 1.000 | 260.517  | 244.093 | 6.75E-05 | 3.45E-05 | 1.124 | 0.0024 | 0.0015 | 1.959   | 0.970 |

|     |                                                                                                        |       |          |         |          |          |       |        |        |         |       |
|-----|--------------------------------------------------------------------------------------------------------|-------|----------|---------|----------|----------|-------|--------|--------|---------|-------|
| 74  | 5'-Methylthioadenosine                                                                                 | 0.975 | 93.3963  | 298.096 | 3.81E-04 | 2.15E-04 | 1.048 | 0.0006 | 0.0014 | 1.769   | 0.823 |
| 75  | Thymine                                                                                                | 0.918 | 94.2766  | 127.050 | 1.51E-05 | 6.61E-08 | 3.272 | 0.0123 | 0.0063 | 227.896 | 7.832 |
| 76  | Malvidin 3-glucoside                                                                                   | 0.839 | 100.318  | 493.133 | 1.34E-04 | 3.70E-05 | 1.590 | 0.0000 | 0.0009 | 3.616   | 1.854 |
| 77  | Diferuloylputrescine                                                                                   | 0.808 | 56.70395 | 441.201 | 4.94E-05 | 2.12E-07 | 3.385 | 0.0031 | 0.0018 | 232.897 | 7.864 |
| 78  | 2-(3,4-dihydroxyphenyl)-5,7-dihydroxy-6-[3,4,5-trihydroxy-6-(hydroxymethyl)oxan-2-yl]-4H-chromen-4-one | 0.675 | 278.916  | 449.107 | 3.50E-04 | 4.83E-06 | 2.921 | 0.0223 | 0.0109 | 72.490  | 6.180 |
| 79  | Capsiate                                                                                               | 0.838 | 58.9105  | 307.189 | 3.10E-06 | 6.61E-08 | 2.758 | 0.0027 | 0.0016 | 46.922  | 5.552 |
| 80  | Bisacurone epoxide                                                                                     | 0.697 | 57.0446  | 269.174 | 3.39E-05 | 2.90E-06 | 2.222 | 0.0001 | 0.0011 | 11.695  | 3.548 |
| 81  | Benzofuran                                                                                             | 0.536 | 325.574  | 119.049 | 1.20E-05 | 1.72E-06 | 2.431 | 0.0047 | 0.0026 | 6.967   | 2.800 |
| 82  | Aflatoxin G2                                                                                           | 0.879 | 121.02   | 331.080 | 1.50E-04 | 2.54E-05 | 1.870 | 0.0000 | 0.0005 | 5.901   | 2.561 |
| 83  | Diplodiatoxin                                                                                          | 0.645 | 104.4055 | 309.205 | 1.26E-05 | 2.33E-06 | 1.826 | 0.0024 | 0.0015 | 5.393   | 2.431 |
| 84  | (-)-Gossypol                                                                                           | 0.856 | 465.04   | 517.189 | 2.30E-06 | 4.70E-07 | 1.781 | 0.0073 | 0.0069 | 4.889   | 2.290 |
| 85  | 2-(3,4-dihydroxyphenyl)-3,5-dihydroxy-7-methoxy-4H-chromen-4-one                                       | 0.880 | 51.97445 | 315.051 | 1.69E-04 | 3.87E-05 | 1.637 | 0.0035 | 0.0062 | 4.367   | 2.127 |
| 86  | (±)-Conen                                                                                              | 0.629 | 429.36   | 305.076 | 4.07E-05 | 1.59E-05 | 1.339 | 0.0014 | 0.0015 | 2.557   | 1.355 |
| 87  | Pregnanetriol                                                                                          | 0.733 | 36.9893  | 337.273 | 7.17E-05 | 2.83E-05 | 1.262 | 0.0445 | 0.0205 | 2.535   | 1.342 |
| 88  | Sulfamethoxazole<br>N4-hydroxylamine                                                                   | 0.898 | 83.1563  | 270.052 | 1.23E-05 | 4.87E-06 | 1.286 | 0.0161 | 0.0081 | 2.519   | 1.333 |
| 89  | Dopamine                                                                                               | 0.447 | 310.7165 | 299.077 | 4.91E-05 | 2.05E-05 | 1.230 | 0.0133 | 0.0072 | 2.398   | 1.262 |
| 90  | 2,4,6-trihydroxy-2-[(4-hydroxyphenyl)methyl]-2,3-dihydro-1-benzofuran-3-one                            | 0.988 | 293.5885 | 271.060 | 1.33E-04 | 5.74E-05 | 1.272 | 0.0005 | 0.0014 | 2.313   | 1.210 |
| 91  | 3,11,12-Trihydroxy-1(10)-spirovetiven-2-one                                                            | 0.561 | 37.69105 | 269.174 | 1.97E-05 | 9.40E-06 | 1.190 | 0.0023 | 0.0015 | 2.092   | 1.065 |
| 92  | 2-Methoxy-3-methylpyrazine                                                                             | 0.796 | 54.95045 | 125.071 | 3.06E-04 | 1.49E-04 | 1.169 | 0.0021 | 0.0015 | 2.056   | 1.040 |
| 93  | Herierin IV                                                                                            | 0.391 | 180.3965 | 171.065 | 2.57E-05 | 1.30E-05 | 1.157 | 0.0000 | 0.0010 | 1.978   | 0.984 |
| 94  | 1-Pyrroline                                                                                            | 0.999 | 331.963  | 70.066  | 4.69E-06 | 2.45E-06 | 1.099 | 0.0058 | 0.0032 | 1.915   | 0.938 |
| 95  | 2-Hydroxyethanesulfonate                                                                               | 0.969 | 149.026  | 124.990 | 2.35E-04 | 1.34E-04 | 1.012 | 0.0007 | 0.0036 | 1.747   | 0.805 |
| 96  | Questinol<br>Vanillin                                                                                  | 0.672 | 132.959  | 301.070 | 3.77E-04 | 2.22E-04 | 1.014 | 0.0007 | 0.0014 | 1.698   | 0.764 |
| 97  | 3-(L-menthoxy)propane-1,2-diol acetal                                                                  | 0.626 | 50.2505  | 365.231 | 5.62E-06 | 6.14E-07 | 2.116 | 0.0055 | 0.0030 | 9.160   | 3.195 |
| 98  | 3-(4-Isopropylphenyl)propanal                                                                          | 0.780 | 62.4195  | 177.127 | 9.20E-06 | 3.28E-06 | 1.424 | 0.0001 | 0.0011 | 2.799   | 1.485 |
| 99  | Imidazole-4-acetaldehyde                                                                               | 0.751 | 63.761   | 111.055 | 4.21E-03 | 1.65E-03 | 1.348 | 0.0012 | 0.0015 | 2.555   | 1.353 |
| 100 | 3-Isoxazolidinone                                                                                      | 0.999 | 397.408  | 88.040  | 2.49E-05 | 2.30E-06 | 2.251 | 0.0007 | 0.0014 | 10.837  | 3.438 |
| 101 | Xanthine                                                                                               | 0.965 | 233.541  | 151.025 | 3.03E-05 | 3.21E-06 | 2.040 | 0.0148 | 0.0072 | 9.431   | 3.237 |
| 102 | Hypoxanthine                                                                                           | 1.000 | 236.753  | 137.046 | 6.03E-05 | 1.78E-05 | 1.786 | 0.0416 | 0.0193 | 3.388   | 1.760 |
| 103 | Imidazoleacetic acid                                                                                   | 0.894 | 95.2574  | 125.034 | 1.81E-04 | 7.47E-05 | 1.269 | 0.0217 | 0.0099 | 2.426   | 1.279 |
| 104 | Fagomine                                                                                               | 0.891 | 321.161  | 148.097 | 4.09E-05 | 2.42E-05 | 1.005 | 0.0006 | 0.0014 | 1.686   | 0.754 |
| 105 | 2-Aminoheptanedioic acid                                                                               | 0.565 | 285.5375 | 176.091 | 3.04E-04 | 4.38E-05 | 1.955 | 0.0001 | 0.0013 | 6.941   | 2.795 |
| 106 | Syringic acid                                                                                          | 0.674 | 85.0591  | 197.045 | 3.38E-05 | 8.87E-06 | 1.571 | 0.0005 | 0.0031 | 3.815   | 1.932 |

|     |                                                                                |       |          |         |          |          |       |        |        |       |        |
|-----|--------------------------------------------------------------------------------|-------|----------|---------|----------|----------|-------|--------|--------|-------|--------|
| 107 | Homovanillic acid                                                              | 0.881 | 51.6393  | 181.050 | 1.21E-03 | 4.24E-04 | 1.371 | 0.0043 | 0.0064 | 2.852 | 1.512  |
| 108 | Phthalic acid                                                                  | 0.643 | 132.1145 | 165.018 | 2.97E-04 | 1.10E-04 | 1.332 | 0.0102 | 0.0070 | 2.701 | 1.433  |
| 109 | [8]-Paradyl acetate                                                            | 0.637 | 36.838   | 349.237 | 2.29E-05 | 8.50E-06 | 1.371 | 0.0329 | 0.0156 | 2.697 | 1.431  |
| 110 | Oxoglutaric acid                                                               | 0.989 | 388.681  | 145.013 | 1.93E-04 | 7.97E-05 | 1.241 | 0.0060 | 0.0067 | 2.420 | 1.275  |
| 111 | Phenylglyoxylic acid                                                           | 0.550 | 56.1983  | 149.023 | 3.95E-05 | 1.64E-05 | 1.225 | 0.0182 | 0.0084 | 2.415 | 1.272  |
| 112 | L-trans-alpha-Amino-2-carboxycyclopropaneacetic acid                           | 0.934 | 428.155  | 160.060 | 1.34E-04 | 6.50E-05 | 1.181 | 0.0005 | 0.0014 | 2.055 | 1.039  |
| 113 | L-Dihydroorotic acid                                                           | 1.000 | 321.3825 | 157.024 | 6.08E-05 | 3.29E-05 | 1.067 | 0.0001 | 0.0009 | 1.846 | 0.884  |
| 114 | Pyrrolidonecarboxylic acid                                                     | 1.000 | 417.611  | 130.050 | 1.38E-03 | 7.99E-04 | 1.029 | 0.0005 | 0.0014 | 1.725 | 0.787  |
| 115 | Gerberinol                                                                     | 0.582 | 190.484  | 365.102 | 3.11E-05 | 6.59E-06 | 1.733 | 0.0016 | 0.0015 | 4.724 | 2.240  |
| 116 | Perilloside C                                                                  | 0.794 | 441.3915 | 317.193 | 8.43E-06 | 4.94E-06 | 1.001 | 0.0047 | 0.0026 | 1.707 | 0.771  |
| 117 | 3,5,7-trihydroxy-2-(4-hydroxyphe<br>nyl)-3,4-dihydro-2H-1-benzopyra<br>n-4-one | 0.521 | 58.7586  | 287.056 | 2.26E-03 | 2.71E-04 | 1.992 | 0.0001 | 0.0009 | 8.363 | 3.064  |
| 118 | 3,4-Dihydro-2H-1-benzopyran-2-<br>one                                          | 0.513 | 280.69   | 149.060 | 9.43E-05 | 3.91E-05 | 1.291 | 0.0030 | 0.0017 | 2.410 | 1.269  |
| 119 | Pyridoxine                                                                     | 0.961 | 102.47   | 170.081 | 2.39E-03 | 8.45E-04 | 1.428 | 0.0001 | 0.0011 | 2.829 | 1.500  |
| 120 | Thiamine monophosphate                                                         | 0.952 | 514.422  | 345.078 | 3.65E-05 | 9.54E-06 | 1.616 | 0.0043 | 0.0024 | 3.825 | 1.936  |
| 121 | Methyl vanillate                                                               | 0.862 | 74.22    | 181.050 | 5.20E-04 | 1.64E-04 | 1.459 | 0.0004 | 0.0028 | 3.167 | 1.663  |
| 122 | 2-Carboxy-4-dodecanolide                                                       | 0.614 | 207.3505 | 243.159 | 4.86E-05 | 2.33E-05 | 1.195 | 0.0002 | 0.0014 | 2.086 | 1.060  |
| 123 | 3-Methylbutyl 2-furanbutanoate                                                 | 0.657 | 208.097  | 225.148 | 3.70E-05 | 1.91E-05 | 1.136 | 0.0004 | 0.0014 | 1.939 | 0.955  |
| 124 | Dihydrolipoate                                                                 | 0.540 | 67.353   | 207.050 | 3.84E-04 | 2.16E-04 | 1.025 | 0.0018 | 0.0053 | 1.780 | 0.832  |
| 125 | Dukunolide B                                                                   | 0.977 | 353.105  | 499.157 | 4.82E-05 | 2.74E-05 | 1.008 | 0.0107 | 0.0056 | 1.760 | 0.815  |
| 126 | N-a-Acetyl-L-arginine                                                          | 0.853 | 392.121  | 217.129 | 2.27E-04 | 4.58E-04 | 1.173 | 0.0054 | 0.0030 | 0.496 | -1.011 |
| 127 | Epsilon-(gamma-Glutamyl)-lysin<br>e                                            | 0.789 | 477.674  | 274.140 | 6.63E-07 | 1.59E-06 | 1.221 | 0.0111 | 0.0071 | 0.416 | -1.264 |
| 128 | Serylasparagine                                                                | 0.491 | 377.862  | 220.105 | 3.16E-05 | 8.65E-05 | 1.390 | 0.0027 | 0.0015 | 0.365 | -1.454 |
| 129 | Isoleucyl-Methionine                                                           | 0.799 | 213.612  | 263.142 | 4.09E-06 | 1.15E-05 | 1.392 | 0.0096 | 0.0050 | 0.356 | -1.491 |
| 130 | Tyrosyl-Glutamine                                                              | 0.709 | 86.1295  | 310.139 | 8.84E-06 | 2.86E-05 | 1.505 | 0.0015 | 0.0015 | 0.309 | -1.693 |
| 131 | HistidinyI-Asparagine                                                          | 0.716 | 394.7845 | 270.119 | 2.47E-06 | 8.09E-06 | 1.466 | 0.0151 | 0.0077 | 0.305 | -1.712 |
| 132 | AsparaginyI-Arginine                                                           | 0.704 | 472.179  | 289.161 | 4.48E-07 | 3.39E-06 | 2.222 | 0.0192 | 0.0095 | 0.132 | -2.918 |
| 133 | Gamma-Aminobutyryl-lysine                                                      | 0.402 | 99.53    | 232.165 | 1.41E-07 | 1.26E-06 | 2.072 | 0.0442 | 0.0203 | 0.112 | -3.162 |
| 134 | Prolyl-Asparagine                                                              | 0.907 | 350.807  | 230.113 | 4.28E-07 | 4.39E-06 | 2.181 | 0.0023 | 0.0015 | 0.098 | -3.356 |
| 135 | Prolyl-Gamma-glutamate                                                         | 0.579 | 448.9275 | 244.140 | 5.23E-07 | 6.35E-06 | 2.230 | 0.0000 | 0.0009 | 0.082 | -3.603 |
| 136 | L-Tryptophan                                                                   | 0.526 | 74.8669  | 203.082 | 1.08E-05 | 2.49E-04 | 2.412 | 0.0136 | 0.0072 | 0.043 | -4.526 |
| 137 | Phenylalanyl-Methionine                                                        | 0.871 | 208.384  | 297.126 | 5.38E-08 | 4.11E-06 | 2.913 | 0.0318 | 0.0151 | 0.013 | -6.258 |
| 138 | Lysyl-Methionine                                                               | 0.580 | 403.764  | 278.153 | 5.02E-07 | 7.25E-06 | 2.349 | 0.0007 | 0.0014 | 0.069 | -3.852 |
| 139 | Stachyose                                                                      | 0.785 | 516.787  | 689.210 | 9.65E-05 | 1.69E-04 | 1.011 | 0.0120 | 0.0062 | 0.569 | -0.813 |
| 140 | Goyaglycoside e                                                                | 0.483 | 313.075  | 781.474 | 6.09E-06 | 1.47E-05 | 1.307 | 0.0005 | 0.0014 | 0.414 | -1.271 |
| 141 | 1-Deoxy-D-glucitol                                                             | 0.574 | 127.8345 | 167.092 | 3.62E-04 | 3.03E-03 | 2.052 | 0.0000 | 0.0002 | 0.119 | -3.069 |
| 142 | (R)-3-Hydroxy-tetradecanoic acid                                               | 0.684 | 71.29765 | 243.196 | 1.07E-05 | 3.56E-05 | 1.404 | 0.0292 | 0.0128 | 0.301 | -1.733 |
| 143 | 4,8 Dimethylnonanoyl carnitine                                                 | 0.886 | 64.1748  | 330.264 | 1.72E-05 | 7.34E-05 | 1.685 | 0.0183 | 0.0091 | 0.234 | -2.097 |
| 144 | PS(18:0/22:6(4Z,7Z,10Z,13Z,16Z<br>,19Z))                                       | 0.815 | 178.5995 | 836.541 | 2.87E-07 | 2.40E-05 | 3.120 | 0.0219 | 0.0108 | 0.012 | -6.386 |



|     |                                                                                                                       |       |          |         |          |          |       |        |        |       |        |
|-----|-----------------------------------------------------------------------------------------------------------------------|-------|----------|---------|----------|----------|-------|--------|--------|-------|--------|
| 145 | Pelargonic acid                                                                                                       | 0.870 | 45.8406  | 157.122 | 7.42E-08 | 6.31E-05 | 3.546 | 0.0145 | 0.0072 | 0.001 | -9.731 |
| 146 | LysoPE(20:5(5Z,8Z,11Z,14Z,17Z)/0:0)                                                                                   | 0.850 | 228.7385 | 500.275 | 3.24E-06 | 8.70E-06 | 1.336 | 0.0442 | 0.0203 | 0.373 | -1.424 |
| 147 | gamma-Aminobutyric acid                                                                                               | 0.980 | 170.5685 | 104.071 | 5.56E-05 | 2.52E-04 | 1.689 | 0.0102 | 0.0054 | 0.221 | -2.180 |
| 148 | Alpha-Linolenic acid                                                                                                  | 1.000 | 50.31515 | 277.217 | 7.37E-04 | 1.49E-03 | 1.094 | 0.0129 | 0.0072 | 0.496 | -1.012 |
| 149 | 13-OxoODE                                                                                                             | 0.989 | 38.0511  | 293.212 | 1.41E-04 | 3.10E-04 | 1.200 | 0.0008 | 0.0039 | 0.454 | -1.138 |
| 150 | Isopentyl beta-D-glucoside                                                                                            | 0.727 | 159.254  | 251.150 | 1.29E-06 | 1.14E-05 | 2.150 | 0.0003 | 0.0014 | 0.113 | -3.151 |
| 151 | LysoPE(18:3(6Z,9Z,12Z)/0:0)                                                                                           | 0.922 | 230.628  | 476.277 | 5.34E-05 | 9.40E-05 | 1.007 | 0.0150 | 0.0076 | 0.568 | -0.817 |
| 152 | 1-Palmitoylglycerophosphoinositol                                                                                     | 0.884 | 273.602  | 573.302 | 4.50E-05 | 9.54E-05 | 1.126 | 0.0406 | 0.0188 | 0.472 | -1.084 |
| 153 | 6"-O-Malonyldaidzin                                                                                                   | 0.723 | 214.586  | 503.119 | 3.78E-04 | 8.01E-04 | 1.213 | 0.0062 | 0.0034 | 0.472 | -1.083 |
| 154 | Genistein 5-glucoside                                                                                                 | 0.988 | 126.809  | 433.112 | 9.47E-03 | 2.12E-02 | 1.229 | 0.0401 | 0.0186 | 0.446 | -1.166 |
| 155 | 6"-O-Acetylglycitin                                                                                                   | 0.946 | 62.5232  | 489.139 | 7.32E-05 | 3.10E-04 | 1.689 | 0.0000 | 0.0004 | 0.236 | -2.082 |
| 156 | 6"-O-Acetylgenistin                                                                                                   | 0.969 | 161.269  | 475.123 | 5.61E-05 | 3.99E-04 | 1.970 | 0.0000 | 0.0003 | 0.141 | -2.829 |
| 157 | 6"-O-Acetyldaidzin                                                                                                    | 0.964 | 61.6527  | 459.129 | 2.22E-04 | 1.93E-03 | 2.067 | 0.0000 | 0.0009 | 0.115 | -3.118 |
| 158 | 6"-O-Malonylwistin                                                                                                    | 0.829 | 91.7124  | 547.145 | 5.38E-08 | 9.16E-06 | 3.186 | 0.0081 | 0.0043 | 0.006 | -7.412 |
| 159 | Naringenin                                                                                                            | 0.955 | 118.185  | 271.061 | 2.98E-04 | 5.44E-04 | 1.006 | 0.0150 | 0.0072 | 0.549 | -0.866 |
| 160 | Daidzin                                                                                                               | 0.937 | 163.2115 | 415.102 | 1.97E-03 | 4.46E-03 | 1.230 | 0.0002 | 0.0016 | 0.442 | -1.178 |
| 161 | Liquiritin                                                                                                            | 0.713 | 164.28   | 417.119 | 6.57E-05 | 1.49E-04 | 1.204 | 0.0061 | 0.0067 | 0.441 | -1.181 |
| 162 | Soyasaponin IV                                                                                                        | 0.587 | 257.04   | 767.458 | 1.25E-05 | 2.87E-05 | 1.242 | 0.0052 | 0.0029 | 0.436 | -1.198 |
| 163 | Diosmetin                                                                                                             | 0.924 | 114.005  | 299.055 | 1.88E-05 | 7.63E-05 | 1.571 | 0.0393 | 0.0167 | 0.247 | -2.019 |
| 164 | Sandosaponin B                                                                                                        | 0.343 | 317.124  | 957.506 | 1.31E-05 | 5.42E-05 | 1.642 | 0.0076 | 0.0041 | 0.242 | -2.046 |
| 165 | 5,7-dihydroxy-2-phenyl-6-[3,4,5-trihydroxy-6-(hydroxymethyl)oxan-2-yl]-8-(3,4,5-trihydroxyoxan-2-yl)-4H-chromen-4-one | 0.408 | 81.57355 | 547.145 | 4.37E-05 | 2.21E-04 | 1.729 | 0.0129 | 0.0072 | 0.197 | -2.340 |
| 166 | Cyanidin 3-(4-acetylglucoside)                                                                                        | 0.960 | 117.3335 | 491.118 | 1.15E-05 | 1.53E-04 | 2.259 | 0.0044 | 0.0024 | 0.075 | -3.727 |
| 167 | Apigenin 7-O-(6"-O-acetylglucoside)                                                                                   | 0.943 | 107.416  | 475.124 | 2.06E-06 | 3.70E-05 | 2.386 | 0.0176 | 0.0088 | 0.056 | -4.169 |
| 168 | Feruloyl-2-hydroxyputrescine                                                                                          | 1.000 | 152.309  | 281.149 | 4.88E-06 | 5.37E-05 | 2.247 | 0.0003 | 0.0014 | 0.091 | -3.459 |
| 169 | 3,3',4',5'-Tetrahydroxystilbene                                                                                       | 0.933 | 116.753  | 243.066 | 1.42E-05 | 5.35E-05 | 1.554 | 0.0019 | 0.0054 | 0.266 | -1.912 |
| 170 | Maltol                                                                                                                | 1.000 | 69.91055 | 127.039 | 9.45E-05 | 9.84E-04 | 2.154 | 0.0000 | 0.0001 | 0.096 | -3.380 |
| 171 | Phlorin                                                                                                               | 0.994 | 164.109  | 289.091 | 4.75E-04 | 3.23E-03 | 1.948 | 0.0000 | 0.0001 | 0.147 | -2.766 |
| 172 | 3-(4-Hydroxyphenyl)-1-propanol                                                                                        | 0.509 | 34.18005 | 153.091 | 6.49E-06 | 1.29E-05 | 1.162 | 0.0000 | 0.0008 | 0.505 | -0.987 |
| 173 | Diacetone alcohol                                                                                                     | 0.980 | 72.8391  | 115.075 | 6.85E-05 | 2.62E-04 | 1.891 | 0.0053 | 0.0066 | 0.261 | -1.937 |
| 174 | Abscisic acid                                                                                                         | 0.849 | 83.3141  | 263.128 | 1.05E-05 | 2.06E-05 | 1.072 | 0.0486 | 0.0201 | 0.509 | -0.974 |
| 175 | FAPy-adenine                                                                                                          | 0.951 | 188.8795 | 154.072 | 1.82E-05 | 8.01E-05 | 1.710 | 0.0000 | 0.0006 | 0.227 | -2.142 |
| 176 | Dihydrouracil                                                                                                         | 0.831 | 60.7731  | 115.050 | 9.30E-06 | 6.83E-05 | 1.985 | 0.0000 | 0.0009 | 0.136 | -2.877 |
| 177 | 5-(2-Hydroxyethyl)-4-methylthiazole                                                                                   | 0.985 | 48.16975 | 144.048 | 2.16E-05 | 4.24E-05 | 1.056 | 0.0420 | 0.0194 | 0.510 | -0.972 |
| 178 | Ethylbenzene                                                                                                          | 0.931 | 34.995   | 107.086 | 1.35E-05 | 2.78E-05 | 1.134 | 0.0129 | 0.0066 | 0.485 | -1.045 |
| 179 | Dinoseb acetate                                                                                                       | 0.901 | 397.4175 | 283.090 | 1.35E-06 | 2.81E-06 | 1.149 | 0.0323 | 0.0153 | 0.480 | -1.058 |
| 180 | Eremopetasinorone A                                                                                                   | 0.676 | 155.032  | 207.138 | 4.26E-05 | 8.98E-05 | 1.203 | 0.0005 | 0.0014 | 0.474 | -1.076 |
| 181 | Beta-Carboline                                                                                                        | 0.918 | 50.1296  | 169.076 | 1.46E-05 | 3.67E-05 | 1.345 | 0.0001 | 0.0012 | 0.398 | -1.327 |

|     |                                                        |       |          |         |          |          |       |        |        |       |        |
|-----|--------------------------------------------------------|-------|----------|---------|----------|----------|-------|--------|--------|-------|--------|
| 182 | Phosphoribosyl<br>formamidocarboxamide                 | 0.595 | 418.2995 | 367.062 | 8.02E-05 | 2.17E-04 | 1.349 | 0.0181 | 0.0091 | 0.370 | -1.434 |
| 183 | Oroselone                                              | 0.752 | 160.403  | 227.070 | 7.68E-06 | 2.25E-05 | 1.402 | 0.0139 | 0.0071 | 0.341 | -1.553 |
| 184 | 7-Hydroxymethyl-12-methylbenz<br>[a]anthracene sulfate | 0.977 | 70.36195 | 353.084 | 1.35E-05 | 1.13E-04 | 2.028 | 0.0217 | 0.0107 | 0.120 | -3.057 |
| 185 | Niacinamide                                            | 0.995 | 60.8059  | 123.055 | 3.23E-04 | 4.82E-03 | 2.310 | 0.0068 | 0.0037 | 0.067 | -3.902 |
| 186 | Sebiferic acid                                         | 0.617 | 303.963  | 441.373 | 8.19E-05 | 1.76E-04 | 1.197 | 0.0041 | 0.0023 | 0.465 | -1.105 |
| 187 | Jujubasaponin IV                                       | 0.352 | 306.007  | 943.524 | 4.69E-04 | 1.00E-03 | 1.188 | 0.0044 | 0.0025 | 0.469 | -1.092 |
| 188 | Jujubasaponin VI                                       | 0.393 | 270.451  | 797.468 | 1.91E-04 | 5.26E-04 | 1.397 | 0.0006 | 0.0014 | 0.364 | -1.459 |
| 189 | Ganoderic acid Mi                                      | 0.761 | 33.2484  | 545.384 | 1.20E-06 | 3.69E-06 | 1.457 | 0.0035 | 0.0020 | 0.326 | -1.617 |
| 190 | S-Furanopetasitin                                      | 0.795 | 495.262  | 433.203 | 7.29E-07 | 2.47E-06 | 1.493 | 0.0140 | 0.0072 | 0.295 | -1.764 |
| 191 | Ganoderal A                                            | 0.720 | 34.374   | 437.341 | 2.85E-07 | 7.91E-06 | 2.733 | 0.0006 | 0.0014 | 0.036 | -4.793 |
| 192 | 2'-Hydroxyacetophenone                                 | 0.993 | 51.0363  | 137.060 | 1.18E-05 | 2.25E-05 | 1.053 | 0.0297 | 0.0142 | 0.525 | -0.930 |
| 193 | 3-[(3-Methylbutyl)nitrosoamino]-<br>2-butanone         | 0.576 | 495.8015 | 187.144 | 4.80E-05 | 1.41E-04 | 1.451 | 0.0004 | 0.0014 | 0.341 | -1.553 |
| 194 | Malonic acid                                           | 0.817 | 392.763  | 103.002 | 5.72E-04 | 1.10E-03 | 1.091 | 0.0020 | 0.0054 | 0.518 | -0.949 |
| 195 | O-Phosphoethanolamine                                  | 0.921 | 488.856  | 142.026 | 6.95E-06 | 1.41E-05 | 1.143 | 0.0103 | 0.0054 | 0.492 | -1.024 |
| 196 | Fumaric acid                                           | 0.998 | 247.122  | 115.002 | 3.42E-04 | 7.73E-04 | 1.185 | 0.0092 | 0.0070 | 0.442 | -1.177 |
| 197 | Ethylparaben                                           | 0.585 | 45.8428  | 165.055 | 4.18E-05 | 3.58E-04 | 1.970 | 0.0473 | 0.0196 | 0.116 | -3.102 |

Note: rt is the chromatographic retention time of the substance; Mass is the exact molecular weight of the metabolite; score is the match with the substance in the database; The mean r is the relative quantitative mean of the substances in the unprocessed black bean group; The mean p is the relative quantitative mean of the substances in the cooked black bean group; VIP is the variable projection importance obtained by the OPLS-DA model of the comparison in this group; P-VALUE is the P value obtained by the t-test of the comparison in this group, P value = the probability that the hypothesis is correct but rejected = the number of negative results / the total number of results, which is a test probability for the sample data; Q-VALUE is the hypothesis test statistic (P value) after correction for multiple hypothesis testing The result of , Q value = probability of being rejected but correct = number of false positive results / number of presumed positive results, which is a test probability for the inference obtained by the t test, and a re-statistic for the P value; FOLD CHANGE is the fold relationship of the substance in the comparison between the two groups of experiments; LOG\_FOLDCHANGE FOLD CHANGE is the logarithm with the base 2, "-" means the relative content is low.

**Table S3 List of differential metabolites between Unprocessed black soybeans and Steamed black soybeans**

|    | Name                                                      | score | rt      | mz      | MEAN r   | MEAN ops | VIP   | P-VAL UE | Q-VA LUE | FOLD CHAN GE | LOG_FO LDCHA NGE |
|----|-----------------------------------------------------------|-------|---------|---------|----------|----------|-------|----------|----------|--------------|------------------|
| 1  | Glycitein                                                 | 0.939 | 260.086 | 283.061 | 3.14E-03 | 1.26E-03 | 1.458 | 0.0156   | 0.0239   | 2.485        | 1.313            |
| 2  | Phenylalanylproline                                       | 0.934 | 260.008 | 261.124 | 7.48E-06 | 3.37E-06 | 1.358 | 0.0076   | 0.0161   | 2.222        | 1.152            |
| 3  | 1-deoxy-1-(N6-lysino)-D-fructose                          | 0.759 | 424.806 | 132.029 | 1.05E-03 | 3.11E-04 | 1.724 | 0.0172   | 0.0250   | 3.375        | 1.755            |
| 4  | D-Aspartic acid                                           | 0.996 | 424.735 | 134.045 | 2.81E-04 | 6.97E-05 | 1.894 | 0.0030   | 0.0121   | 4.034        | 2.012            |
| 5  | L-Pipecolic acid                                          | 0.993 | 224.347 | 130.083 | 5.37E-05 | 3.43E-05 | 1.046 | 0.0088   | 0.0267   | 1.564        | 0.645            |
| 6  | D-Glutamine                                               | 0.990 | 395.613 | 147.076 | 3.65E-04 | 2.22E-04 | 1.136 | 0.0003   | 0.0027   | 1.644        | 0.717            |
| 7  | Prolylphenylalanine                                       | 0.909 | 257.011 | 263.139 | 1.04E-04 | 6.69E-05 | 1.068 | 0.0002   | 0.0020   | 1.549        | 0.632            |
| 8  | Prolyl-Glutamine                                          | 0.845 | 367.518 | 244.129 | 5.44E-06 | 1.68E-06 | 1.734 | 0.0019   | 0.0088   | 3.232        | 1.692            |
| 9  | N-Acetyl-L-glutamate 5-semialdehyde                       | 0.793 | 394.414 | 174.076 | 1.27E-03 | 8.31E-04 | 1.037 | 0.0247   | 0.0546   | 1.531        | 0.615            |
| 10 | Valyl-Threonine                                           | 0.781 | 242.901 | 219.134 | 2.84E-04 | 6.50E-05 | 1.937 | 0.0059   | 0.0200   | 4.373        | 2.129            |
| 11 | Histidinyl-Methionine                                     | 0.765 | 323.480 | 287.117 | 1.82E-05 | 2.87E-06 | 2.198 | 0.0023   | 0.0100   | 6.364        | 2.670            |
| 12 | Lysinoalanine                                             | 0.747 | 473.379 | 234.144 | 1.18E-05 | 5.16E-06 | 1.399 | 0.0181   | 0.0437   | 2.295        | 1.198            |
| 13 | gamma-Glutamylvaline                                      | 0.607 | 396.464 | 247.129 | 1.61E-04 | 1.04E-04 | 1.057 | 0.0017   | 0.0081   | 1.547        | 0.630            |
| 14 | Threoninyl-Serine                                         | 0.585 | 409.705 | 207.101 | 2.28E-05 | 1.36E-05 | 1.113 | 0.0126   | 0.0341   | 1.668        | 0.738            |
| 15 | Tryptophyl-Tryptophan                                     | 0.550 | 211.644 | 391.175 | 3.19E-05 | 1.78E-05 | 1.233 | 0.0002   | 0.0020   | 1.792        | 0.842            |
| 16 | L-Iditol                                                  | 0.954 | 309.838 | 181.071 | 1.32E-03 | 8.12E-04 | 1.095 | 0.0001   | 0.0008   | 1.620        | 0.696            |
| 17 | D-Xylose                                                  | 0.780 | 314.593 | 149.044 | 1.35E-03 | 7.77E-04 | 1.133 | 0.0125   | 0.0215   | 1.732        | 0.793            |
| 18 | Gluconolactone                                            | 0.653 | 123.320 | 177.039 | 1.96E-04 | 9.52E-05 | 1.321 | 0.0029   | 0.0082   | 2.056        | 1.040            |
| 19 | Hydroxytyrosol 1-O-glucoside                              | 0.841 | 204.073 | 317.126 | 9.47E-06 | 1.81E-06 | 2.082 | 0.0001   | 0.0011   | 5.225        | 2.385            |
| 20 | Chrysoeriol 7-O-(6"-malonyl-glucoside)                    | 0.590 | 236.021 | 549.123 | 4.26E-05 | 1.98E-05 | 1.407 | 0.0005   | 0.0035   | 2.149        | 1.103            |
| 21 | 5,7-Dihydroxy-2',6-dimethoxyisoflavone 7-rhamnoside       | 0.541 | 190.466 | 461.144 | 5.88E-04 | 3.34E-04 | 1.191 | 0.0060   | 0.0201   | 1.761        | 0.816            |
| 22 | 4',8-Dimethylgossypetin 3-glucoside                       | 0.498 | 180.767 | 509.129 | 1.10E-05 | 8.31E-07 | 2.612 | 0.0008   | 0.0051   | 13.201       | 3.723            |
| 23 | Leucinic acid                                             | 0.998 | 137.152 | 131.070 | 3.05E-03 | 1.12E-03 | 1.569 | 0.0130   | 0.0219   | 2.728        | 1.448            |
| 24 | Dihydrojasmonic acid                                      | 0.992 | 133.922 | 211.133 | 2.66E-06 | 5.53E-07 | 1.947 | 0.0258   | 0.0292   | 4.817        | 2.268            |
| 25 | 9,10-Epoxyoctadecenoic acid                               | 0.991 | 54.675  | 295.227 | 5.40E-04 | 3.09E-04 | 1.171 | 0.0012   | 0.0042   | 1.748        | 0.806            |
| 26 | 16-Hydroxy hexadecanoic acid                              | 0.984 | 76.769  | 271.228 | 7.33E-05 | 3.27E-05 | 1.391 | 0.0056   | 0.0132   | 2.242        | 1.165            |
| 27 | 9,10-DHOME                                                | 0.948 | 65.547  | 313.238 | 1.08E-04 | 6.04E-05 | 1.202 | 0.0003   | 0.0016   | 1.790        | 0.840            |
| 28 | Traumatic acid                                            | 0.862 | 241.441 | 227.128 | 3.63E-04 | 1.28E-04 | 1.615 | 0.0000   | 0.0003   | 2.841        | 1.506            |
| 29 | (9xi,10xi,12xi)-9,10-Dihydroxy-12-octadecenoic acid       | 0.702 | 79.663  | 313.238 | 8.32E-05 | 3.91E-05 | 1.369 | 0.0002   | 0.0013   | 2.130        | 1.091            |
| 30 | 2-Isopropylmalic acid                                     | 0.600 | 64.551  | 175.060 | 1.05E-04 | 5.48E-05 | 1.260 | 0.0017   | 0.0054   | 1.913        | 0.936            |
| 31 | (9S,10E,12Z,15Z)-9-Hydroxy-10,12,15-octadecatrienoic acid | 0.930 | 36.134  | 277.215 | 3.18E-05 | 1.68E-05 | 1.274 | 0.0021   | 0.0094   | 1.890        | 0.918            |
| 32 | Linoleoyl ethanolamide                                    | 0.856 | 35.904  | 324.289 | 7.17E-05 | 1.90E-05 | 1.859 | 0.0003   | 0.0025   | 3.770        | 1.915            |

|    |                                                                                                                       |       |         |         |          |          |       |        |        |             |       |
|----|-----------------------------------------------------------------------------------------------------------------------|-------|---------|---------|----------|----------|-------|--------|--------|-------------|-------|
| 33 | Deacetylisovaltrate                                                                                                   | 0.763 | 396.479 | 381.188 | 1.42E-05 | 5.20E-08 | 3.838 | 0.0181 | 0.0438 | 273.04<br>2 | 8.093 |
| 34 | MG(0:0/18:3(6Z,9Z,12Z)/0:0)                                                                                           | 0.741 | 35.927  | 353.268 | 3.01E-05 | 1.21E-05 | 1.461 | 0.0408 | 0.0751 | 2.494       | 1.318 |
| 35 | (2'E,4'Z,7'Z,8E)-Colnelenic acid                                                                                      | 0.703 | 63.346  | 293.211 | 1.41E-05 | 6.55E-06 | 1.343 | 0.0152 | 0.0389 | 2.158       | 1.110 |
| 36 | MG(0:0/18:4(6Z,9Z,12Z,15Z)/0:0)                                                                                       | 0.695 | 36.239  | 351.252 | 4.05E-05 | 1.56E-05 | 1.565 | 0.0029 | 0.0118 | 2.604       | 1.381 |
| 37 | LysoPC(14:0/0:0)                                                                                                      | 0.537 | 228.128 | 468.308 | 2.11E-05 | 8.16E-06 | 1.563 | 0.0010 | 0.0058 | 2.586       | 1.371 |
| 38 | LysoPC(18:3(6Z,9Z,12Z))                                                                                               | 0.534 | 225.366 | 518.324 | 7.11E-04 | 3.89E-04 | 1.170 | 0.0375 | 0.0715 | 1.828       | 0.870 |
| 39 | LysoPC(16:1(9Z)/0:0)                                                                                                  | 0.528 | 225.425 | 494.325 | 2.11E-05 | 1.12E-05 | 1.193 | 0.0352 | 0.0687 | 1.891       | 0.919 |
| 40 | Alpha-Linolenic acid                                                                                                  | 1.000 | 50.315  | 277.217 | 7.37E-04 | 4.52E-04 | 1.038 | 0.0314 | 0.0311 | 1.630       | 0.705 |
| 41 | Panaquinquecol 1                                                                                                      | 0.653 | 203.871 | 293.211 | 1.32E-06 | 3.52E-07 | 1.877 | 0.0197 | 0.0464 | 3.762       | 1.912 |
| 42 | Daidzein                                                                                                              | 0.999 | 260.581 | 253.050 | 8.78E-03 | 3.84E-03 | 1.411 | 0.0011 | 0.0040 | 2.283       | 1.191 |
| 43 | 6"-Malonylgenistin                                                                                                    | 0.965 | 240.327 | 519.114 | 1.25E-02 | 7.27E-03 | 1.185 | 0.0004 | 0.0029 | 1.716       | 0.779 |
| 44 | 2'-Hydroxygenistein<br>7-(6"-malonylglucoside)                                                                        | 0.834 | 266.351 | 535.108 | 7.39E-05 | 4.03E-05 | 1.236 | 0.0024 | 0.0103 | 1.833       | 0.874 |
| 45 | (-)-Epiafzelechin                                                                                                     | 0.962 | 58.128  | 273.076 | 3.78E-03 | 7.22E-04 | 2.034 | 0.0000 | 0.0004 | 5.234       | 2.388 |
| 46 | 5,7-dihydroxy-2-(4-hydroxy-3-methoxyphenyl)-3-<br>{[3,4,5-trihydroxy-6-(hydroxymethyl)oxan-2-yl]oxy}-4H-chromen-4-one | 0.782 | 179.797 | 477.104 | 8.49E-05 | 5.01E-05 | 1.077 | 0.0200 | 0.0266 | 1.694       | 0.760 |
| 47 | Norizalpinin                                                                                                          | 0.754 | 294.630 | 269.045 | 1.00E-04 | 4.77E-05 | 1.345 | 0.0008 | 0.0031 | 2.106       | 1.075 |
| 48 | 3,5,7-trihydroxy-2-(4-hydroxyphenyl)-3,4-dihydro-2H-1-benzopyran-4-one                                                | 0.521 | 58.759  | 287.056 | 2.26E-03 | 5.26E-04 | 1.907 | 0.0003 | 0.0016 | 4.300       | 2.104 |
| 49 | Cosmosiin                                                                                                             | 0.996 | 201.839 | 433.112 | 3.31E-03 | 1.17E-04 | 2.960 | 0.0125 | 0.0339 | 28.315      | 4.824 |
| 50 | Luteolin                                                                                                              | 0.994 | 521.279 | 287.054 | 1.53E-04 | 3.27E-05 | 1.992 | 0.0256 | 0.0559 | 4.688       | 2.229 |
| 51 | Peonidin-3-glucoside                                                                                                  | 0.990 | 153.425 | 463.123 | 3.02E-04 | 5.95E-05 | 2.066 | 0.0000 | 0.0007 | 5.068       | 2.341 |
| 52 | Sideritiflavone                                                                                                       | 0.989 | 102.955 | 361.091 | 2.97E-05 | 1.14E-05 | 1.583 | 0.0000 | 0.0006 | 2.602       | 1.379 |
| 53 | Isorhamnetin                                                                                                          | 0.981 | 192.786 | 317.066 | 1.49E-04 | 3.72E-05 | 1.911 | 0.0000 | 0.0002 | 4.003       | 2.001 |
| 54 | Luteolin 7-galactoside                                                                                                | 0.944 | 241.710 | 449.107 | 4.30E-03 | 2.82E-04 | 2.674 | 0.0080 | 0.0250 | 15.215      | 3.927 |
| 55 | Trilobatin                                                                                                            | 0.865 | 202.976 | 437.143 | 1.22E-05 | 1.69E-06 | 2.285 | 0.0013 | 0.0068 | 7.198       | 2.848 |
| 56 | Citrusinine II                                                                                                        | 0.448 | 60.782  | 288.086 | 5.56E-04 | 1.07E-04 | 2.072 | 0.0116 | 0.0324 | 5.197       | 2.378 |
| 57 | 2-(3,4-dihydroxyphenyl)-5,7-dihydroxy-6-[3,4,5-trihydroxy-6-(hydroxymethyl)oxan-2-yl]-4H-chromen-4-one                | 0.675 | 278.916 | 449.107 | 3.50E-04 | 3.49E-05 | 2.441 | 0.0263 | 0.0569 | 10.041      | 3.328 |
| 58 | Carthamone                                                                                                            | 0.959 | 475.950 | 449.107 | 8.95E-04 | 1.74E-04 | 2.073 | 0.0013 | 0.0069 | 5.133       | 2.360 |
| 59 | Marmesin                                                                                                              | 0.897 | 136.361 | 245.082 | 1.01E-04 | 4.92E-05 | 1.282 | 0.0181 | 0.0256 | 2.053       | 1.038 |
| 60 | benzene-1,2,4-triol                                                                                                   | 0.967 | 392.763 | 125.023 | 2.17E-04 | 1.37E-04 | 1.034 | 0.0055 | 0.0130 | 1.582       | 0.662 |
| 61 | Inosine                                                                                                               | 0.879 | 237.145 | 267.073 | 2.96E-05 | 1.31E-05 | 1.383 | 0.0079 | 0.0166 | 2.248       | 1.168 |
| 62 | Cytidine 2'-phosphate                                                                                                 | 0.997 | 456.936 | 324.059 | 4.29E-05 | 1.26E-05 | 1.772 | 0.0020 | 0.0093 | 3.389       | 1.761 |
| 63 | Abscisic acid                                                                                                         | 0.693 | 107.366 | 265.143 | 9.10E-06 | 1.11E-06 | 2.320 | 0.0343 | 0.0677 | 8.187       | 3.033 |
| 64 | Thymine                                                                                                               | 0.918 | 94.277  | 127.050 | 1.51E-05 | 5.20E-08 | 3.859 | 0.0123 | 0.0336 | 289.56<br>7 | 8.178 |
| 65 | 5-Aminoimidazole ribonucleotide                                                                                       | 0.498 | 407.904 | 296.066 | 2.28E-04 | 1.14E-04 | 1.329 | 0.0173 | 0.0423 | 1.993       | 0.995 |

|     |                                                                                                           |       |         |         |          |          |       |        |        |        |        |
|-----|-----------------------------------------------------------------------------------------------------------|-------|---------|---------|----------|----------|-------|--------|--------|--------|--------|
| 66  | Malvidin 3-glucoside                                                                                      | 0.839 | 100.318 | 493.133 | 1.34E-04 | 5.22E-05 | 1.572 | 0.0000 | 0.0006 | 2.565  | 1.359  |
| 67  | Dopamine                                                                                                  | 0.447 | 310.717 | 299.077 | 4.91E-05 | 2.47E-05 | 1.266 | 0.0163 | 0.0244 | 1.991  | 0.993  |
| 68  | 2,4,6-trihydroxy-2-[(4-hydroxyphenyl)methyl]-2,3-dihydro-1-benzofuran-3-one                               | 0.988 | 293.589 | 271.060 | 1.33E-04 | 5.35E-05 | 1.546 | 0.0000 | 0.0005 | 2.480  | 1.311  |
| 69  | Aflatoxin G2                                                                                              | 0.879 | 121.020 | 331.080 | 1.50E-04 | 3.62E-05 | 1.934 | 0.0000 | 0.0001 | 4.131  | 2.046  |
| 70  | Capsiate                                                                                                  | 0.838 | 58.911  | 307.189 | 3.10E-06 | 5.34E-07 | 2.170 | 0.0009 | 0.0052 | 5.801  | 2.536  |
| 71  | Diferuloylputrescine                                                                                      | 0.808 | 56.704  | 441.201 | 4.94E-05 | 3.12E-06 | 2.702 | 0.0001 | 0.0011 | 15.807 | 3.982  |
| 72  | Dihydrotestosterone                                                                                       | 0.756 | 31.617  | 291.231 | 8.32E-06 | 2.60E-06 | 1.725 | 0.0035 | 0.0135 | 3.199  | 1.678  |
| 73  | Bisacurone epoxide                                                                                        | 0.697 | 57.045  | 269.174 | 3.39E-05 | 8.93E-06 | 1.866 | 0.0001 | 0.0014 | 3.792  | 1.923  |
| 74  | Diplodiatoxin                                                                                             | 0.645 | 104.406 | 309.205 | 1.26E-05 | 7.71E-07 | 2.713 | 0.0073 | 0.0233 | 16.292 | 4.026  |
| 75  | 3,11,12-Trihydroxy-1(10)-spirovetiven-2-one                                                               | 0.561 | 37.691  | 269.174 | 1.97E-05 | 4.21E-06 | 2.007 | 0.0005 | 0.0035 | 4.671  | 2.224  |
| 76  | 3-(4-Isopropylphenyl)propanal<br>Vanillin                                                                 | 0.780 | 62.420  | 177.127 | 9.20E-06 | 4.55E-06 | 1.325 | 0.0032 | 0.0127 | 2.022  | 1.016  |
| 77  | 3-(L-menthoxy)propane-1,2-diol<br>acetal                                                                  | 0.626 | 50.251  | 365.231 | 5.62E-06 | 2.62E-06 | 1.301 | 0.0428 | 0.0772 | 2.144  | 1.100  |
| 78  | Imidazoleacetic acid                                                                                      | 0.894 | 95.257  | 125.034 | 1.81E-04 | 1.16E-04 | 1.004 | 0.0187 | 0.0259 | 1.557  | 0.639  |
| 79  | Protoporphyrin IX                                                                                         | 0.776 | 309.273 | 561.254 | 1.58E-04 | 8.65E-05 | 1.225 | 0.0000 | 0.0004 | 1.826  | 0.868  |
| 80  | Nicotine                                                                                                  | 0.906 | 69.482  | 163.123 | 1.66E-04 | 9.80E-05 | 1.167 | 0.0003 | 0.0027 | 1.694  | 0.760  |
| 81  | Syringic acid                                                                                             | 0.674 | 85.059  | 197.045 | 3.38E-05 | 1.96E-05 | 1.087 | 0.0187 | 0.0259 | 1.727  | 0.788  |
| 82  | Phthalic acid                                                                                             | 0.643 | 132.115 | 165.018 | 2.97E-04 | 9.93E-05 | 1.650 | 0.0001 | 0.0008 | 2.995  | 1.582  |
| 83  | Phenylglyoxylic acid                                                                                      | 0.550 | 56.198  | 149.023 | 3.95E-05 | 2.44E-05 | 1.045 | 0.0164 | 0.0244 | 1.620  | 0.696  |
| 84  | [8]-Paradyl acetate                                                                                       | 0.637 | 36.838  | 349.237 | 2.29E-05 | 1.20E-05 | 1.253 | 0.0180 | 0.0435 | 1.914  | 0.937  |
| 85  | Norophthalmic acid                                                                                        | 0.581 | 437.290 | 276.119 | 2.19E-05 | 1.33E-05 | 1.043 | 0.0463 | 0.0806 | 1.638  | 0.712  |
| 86  | 2-Aminoheptanedioic acid                                                                                  | 0.565 | 285.538 | 176.091 | 3.04E-04 | 5.91E-05 | 2.072 | 0.0048 | 0.0171 | 5.135  | 2.360  |
| 87  | 5-Heptyltetrahydro-2-oxo-3-furan-carboxylic acid                                                          | 0.525 | 58.136  | 229.143 | 1.41E-05 | 5.28E-06 | 1.581 | 0.0033 | 0.0129 | 2.671  | 1.417  |
| 88  | Gerberinol                                                                                                | 0.582 | 190.484 | 365.102 | 3.11E-05 | 1.38E-05 | 1.414 | 0.0093 | 0.0277 | 2.256  | 1.173  |
| 89  | Pisumsaponin II                                                                                           | 0.470 | 300.376 | 941.511 | 1.78E-04 | 7.65E-05 | 1.491 | 0.0000 | 0.0002 | 2.331  | 1.221  |
| 90  | Calendulaglycoside E                                                                                      | 0.453 | 262.060 | 795.450 | 8.69E-05 | 4.21E-05 | 1.375 | 0.0001 | 0.0013 | 2.063  | 1.045  |
| 91  | Menthone 1,2-glyceryl ketal                                                                               | 0.913 | 437.548 | 298.100 | 1.52E-06 | 5.74E-07 | 1.529 | 0.0431 | 0.0775 | 2.656  | 1.409  |
| 92  | 3alpha,4,7,7alpha-Tetrahydro-4-hydroxy-1H-isoindole-1,3(2H)-dione                                         | 0.774 | 86.994  | 168.065 | 2.46E-04 | 1.38E-04 | 1.229 | 0.0002 | 0.0020 | 1.784  | 0.835  |
| 93  | Pyridoxine                                                                                                | 0.961 | 102.470 | 170.081 | 2.39E-03 | 1.60E-03 | 1.023 | 0.0002 | 0.0016 | 1.493  | 0.578  |
| 94  | Dukunolide B                                                                                              | 0.977 | 353.105 | 499.157 | 4.82E-05 | 2.67E-05 | 1.229 | 0.0195 | 0.0460 | 1.807  | 0.854  |
| 95  | Thiamine monophosphate                                                                                    | 0.952 | 514.422 | 345.078 | 3.65E-05 | 2.19E-05 | 1.147 | 0.0007 | 0.0043 | 1.664  | 0.734  |
| 96  | Linalyl phenylacetate                                                                                     | 0.828 | 36.449  | 273.184 | 2.70E-06 | 8.93E-07 | 1.599 | 0.0424 | 0.0767 | 3.028  | 1.598  |
| 97  | N-Acetylleucine                                                                                           | 0.887 | 219.207 | 172.097 | 5.28E-05 | 1.73E-04 | 1.843 | 0.0387 | 0.0329 | 0.305  | -1.714 |
| 98  | L-Tryptophan<br>(alpha-D-mannosyl)7-beta-D-mannosyl-diacetylchitobiosyl-L-asparagine, isoform A (protein) | 0.526 | 74.867  | 203.082 | 1.08E-05 | 4.83E-04 | 3.086 | 0.0003 | 0.0016 | 0.022  | -5.482 |
| 99  | Prolyl-Asparagine                                                                                         | 1.000 | 368.834 | 90.055  | 5.52E-04 | 8.60E-04 | 1.077 | 0.0000 | 0.0007 | 0.642  | -0.639 |
| 100 | Prolyl-Asparagine                                                                                         | 0.907 | 350.807 | 230.113 | 4.28E-07 | 3.13E-06 | 2.309 | 0.0026 | 0.0111 | 0.137  | -2.868 |

|     |                                                                  |       |         |         |          |          |       |        |        |       |        |
|-----|------------------------------------------------------------------|-------|---------|---------|----------|----------|-------|--------|--------|-------|--------|
| 101 | Phenylalanyl-Methionine                                          | 0.871 | 208.384 | 297.126 | 5.38E-08 | 6.19E-06 | 3.534 | 0.0053 | 0.0185 | 0.009 | -6.847 |
| 102 | Histidinal                                                       | 0.836 | 152.336 | 140.082 | 1.22E-04 | 1.86E-04 | 1.057 | 0.0001 | 0.0012 | 0.653 | -0.616 |
| 103 | Tryptophyl-Tyrosine                                              | 0.817 | 430.260 | 368.156 | 5.38E-08 | 2.78E-06 | 3.223 | 0.0048 | 0.0172 | 0.019 | -5.690 |
| 104 | Arginyl-Phenylalanine                                            | 0.791 | 362.105 | 322.187 | 8.22E-06 | 1.58E-05 | 1.251 | 0.0168 | 0.0416 | 0.521 | -0.940 |
| 105 | Histidinyl-Phenylalanine                                         | 0.773 | 300.749 | 303.144 | 5.60E-07 | 4.88E-06 | 2.734 | 0.0013 | 0.0068 | 0.115 | -3.123 |
| 106 | Lysyl-Valine                                                     | 0.766 | 552.461 | 246.181 | 2.00E-05 | 3.34E-05 | 1.097 | 0.0274 | 0.0586 | 0.597 | -0.743 |
| 107 | N6-Acetyl-L-lysine                                               | 0.750 | 371.344 | 189.123 | 6.14E-05 | 1.20E-04 | 1.331 | 0.0000 | 0.0003 | 0.509 | -0.973 |
| 108 | Tyrosyl-Glutamine                                                | 0.709 | 86.130  | 310.139 | 8.84E-06 | 5.05E-05 | 2.141 | 0.0000 | 0.0004 | 0.175 | -2.513 |
| 109 | Valyl-Asparagine                                                 | 0.669 | 331.395 | 232.129 | 2.53E-06 | 6.59E-06 | 1.566 | 0.0213 | 0.0492 | 0.384 | -1.381 |
| 110 | Lysyl-Methionine                                                 | 0.580 | 403.764 | 278.153 | 5.02E-07 | 2.41E-06 | 2.058 | 0.0148 | 0.0382 | 0.209 | -2.262 |
| 111 | Proyl-Gamma-glutamate                                            | 0.579 | 448.928 | 244.140 | 5.23E-07 | 1.37E-05 | 2.949 | 0.0000 | 0.0004 | 0.038 | -4.717 |
| 112 | Tryptophyl-Methionine                                            | 0.578 | 219.271 | 336.137 | 5.38E-08 | 4.21E-07 | 2.319 | 0.0122 | 0.0335 | 0.128 | -2.969 |
| 113 | Gamma-Aminobutyryl-lysine                                        | 0.402 | 99.530  | 232.165 | 1.41E-07 | 1.46E-06 | 2.510 | 0.0149 | 0.0385 | 0.097 | -3.372 |
| 114 | N-Acetyl-glucosamine 1-phosphate                                 | 0.594 | 464.383 | 300.049 | 1.73E-05 | 3.15E-05 | 1.118 | 0.0488 | 0.0348 | 0.549 | -0.866 |
| 115 | Sucrose                                                          | 0.999 | 408.433 | 365.106 | 9.10E-05 | 2.48E-04 | 1.616 | 0.0002 | 0.0022 | 0.366 | -1.448 |
| 116 | D-Arabinose 5-phosphate                                          | 0.608 | 436.115 | 213.016 | 1.31E-07 | 1.46E-06 | 2.574 | 0.0058 | 0.0196 | 0.089 | -3.483 |
| 117 | 1-Deoxy-D-glucitol                                               | 0.574 | 127.835 | 167.092 | 3.62E-04 | 4.33E-03 | 2.559 | 0.0000 | 0.0000 | 0.083 | -3.583 |
| 118 | 9-Hydroxy-7-megastigmen-3-one glucoside                          | 0.566 | 440.555 | 373.219 | 1.70E-06 | 3.15E-06 | 1.227 | 0.0104 | 0.0298 | 0.539 | -0.893 |
| 119 | Goyaglycoside e                                                  | 0.483 | 313.075 | 781.474 | 6.09E-06 | 1.27E-05 | 1.362 | 0.0018 | 0.0085 | 0.481 | -1.056 |
| 120 | Melibiose                                                        | 0.467 | 416.475 | 360.150 | 1.21E-04 | 3.75E-04 | 1.748 | 0.0351 | 0.0686 | 0.322 | -1.634 |
| 121 | Lithocholate 3-O-glucuronide                                     | 0.443 | 327.219 | 553.334 | 5.38E-08 | 2.77E-06 | 3.191 | 0.0454 | 0.0797 | 0.019 | -5.686 |
| 122 | Marmesin rhamnoside                                              | 0.411 | 93.043  | 393.151 | 4.77E-05 | 8.21E-05 | 1.156 | 0.0051 | 0.0179 | 0.581 | -0.784 |
| 123 | Mesaconic acid                                                   | 0.994 | 467.967 | 129.018 | 5.08E-04 | 8.04E-04 | 1.068 | 0.0001 | 0.0006 | 0.632 | -0.663 |
| 124 | (R)-3-Hydroxy-tetradecanoic acid                                 | 0.684 | 71.298  | 243.196 | 1.07E-05 | 2.91E-05 | 1.547 | 0.0029 | 0.0082 | 0.368 | -1.443 |
| 125 | 2-Oxo-4-methylthiobutanoic acid                                  | 0.847 | 389.364 | 149.027 | 5.38E-08 | 5.88E-06 | 3.510 | 0.0146 | 0.0378 | 0.009 | -6.774 |
| 126 | gamma-Aminobutyric acid                                          | 0.980 | 170.569 | 104.071 | 5.56E-05 | 3.62E-04 | 2.211 | 0.0004 | 0.0033 | 0.154 | -2.701 |
| 127 | Dihydrozeatin-O-glucoside                                        | 0.800 | 411.501 | 384.187 | 1.11E-06 | 4.34E-06 | 1.934 | 0.0073 | 0.0233 | 0.256 | -1.966 |
| 128 | Isopentyl beta-D-glucoside                                       | 0.727 | 159.254 | 251.150 | 1.29E-06 | 2.20E-05 | 2.814 | 0.0036 | 0.0137 | 0.058 | -4.098 |
| 129 | Genistein                                                        | 0.999 | 37.315  | 269.045 | 1.18E-03 | 3.27E-03 | 1.551 | 0.0087 | 0.0176 | 0.360 | -1.475 |
| 130 | Glycitin                                                         | 0.847 | 201.651 | 445.113 | 3.54E-05 | 6.52E-05 | 1.231 | 0.0002 | 0.0014 | 0.543 | -0.881 |
| 131 | 6-Hydroxydaidzein 4'-glucoside                                   | 0.989 | 155.042 | 433.112 | 4.58E-04 | 1.56E-03 | 1.735 | 0.0118 | 0.0326 | 0.293 | -1.771 |
| 132 | Genistein 5-glucoside                                            | 0.988 | 126.809 | 433.112 | 9.47E-03 | 1.78E-02 | 1.290 | 0.0000 | 0.0004 | 0.531 | -0.914 |
| 133 | 6"-O-Acetylgenistin                                              | 0.969 | 161.269 | 475.123 | 5.61E-05 | 3.32E-04 | 2.164 | 0.0000 | 0.0001 | 0.169 | -2.566 |
| 134 | 6"-O-Acetylaidzin                                                | 0.964 | 61.653  | 459.129 | 2.22E-04 | 2.11E-03 | 2.436 | 0.0000 | 0.0002 | 0.105 | -3.250 |
| 135 | 6"-O-Acetylglucitin                                              | 0.946 | 62.523  | 489.139 | 7.32E-05 | 6.30E-04 | 2.381 | 0.0000 | 0.0001 | 0.116 | -3.105 |
| 136 | Genistin                                                         | 0.937 | 219.125 | 433.113 | 4.94E-04 | 8.58E-04 | 1.197 | 0.0005 | 0.0037 | 0.575 | -0.797 |
| 137 | 6"-O-Malonyldaidzin                                              | 0.723 | 214.586 | 503.119 | 3.78E-04 | 6.85E-04 | 1.250 | 0.0000 | 0.0002 | 0.552 | -0.856 |
| 138 | Ononin                                                           | 0.684 | 118.233 | 431.134 | 2.69E-05 | 7.33E-05 | 1.621 | 0.0001 | 0.0010 | 0.367 | -1.447 |
| 139 | Luteolin 7-glucoside                                             | 0.964 | 189.276 | 447.093 | 1.07E-03 | 1.73E-03 | 1.087 | 0.0006 | 0.0024 | 0.618 | -0.694 |
| 140 | Daidzin                                                          | 0.937 | 163.212 | 415.102 | 1.97E-03 | 4.53E-03 | 1.445 | 0.0000 | 0.0001 | 0.434 | -1.203 |
| 141 | Diosmetin                                                        | 0.924 | 114.005 | 299.055 | 1.88E-05 | 7.12E-05 | 1.820 | 0.0000 | 0.0004 | 0.265 | -1.918 |
| 142 | 2-(3,4-dihydroxyphenyl)-3,5-dihydroxy-7-methoxy-4H-chromen-4-one | 0.880 | 51.974  | 315.051 | 1.69E-04 | 6.95E-04 | 1.870 | 0.0004 | 0.0019 | 0.243 | -2.038 |

|     |                                                                                                                                   |       |         |         |          |          |       |        |        |       |         |
|-----|-----------------------------------------------------------------------------------------------------------------------------------|-------|---------|---------|----------|----------|-------|--------|--------|-------|---------|
| 143 | Liquiritin                                                                                                                        | 0.713 | 164.280 | 417.119 | 6.57E-05 | 1.56E-04 | 1.457 | 0.0017 | 0.0056 | 0.421 | -1.248  |
| 144 | Naringin                                                                                                                          | 0.653 | 224.806 | 579.172 | 7.42E-08 | 2.22E-04 | 4.478 | 0.0015 | 0.0049 | 0.000 | -11.545 |
| 145 | 5,7-dihydroxy-2-phenyl-6-[3,4,5-tri<br>hydroxy-6-(hydroxymethyl)oxan-2-<br>yl]-8-(3,4,5-trihydroxyoxan-2-yl)-4<br>H-chromen-4-one | 0.408 | 81.574  | 547.145 | 4.37E-05 | 3.55E-04 | 2.290 | 0.0000 | 0.0000 | 0.123 | -3.021  |
| 146 | Naringenin                                                                                                                        | 0.984 | 175.125 | 273.075 | 1.53E-04 | 3.34E-04 | 1.303 | 0.0493 | 0.0833 | 0.459 | -1.122  |
| 147 | Cyanidin 3-(4-acetylglucoside)                                                                                                    | 0.960 | 117.334 | 491.118 | 1.15E-05 | 1.44E-04 | 2.580 | 0.0000 | 0.0000 | 0.080 | -3.64   |
| 148 | Apigenin                                                                                                                          | 0.943 | 107.416 | 475.124 | 2.06E-06 | 5.09E-05 | 2.914 | 0.0000 | 0.0001 | 0.040 | -4.628  |
| 149 | 7-O-(6"-O-acetylglucoside)                                                                                                        | 0.829 | 91.712  | 547.145 | 5.38E-08 | 9.21E-06 | 3.682 | 0.0015 | 0.0077 | 0.006 | -7.421  |
| 150 | 6"-O-Malonylwistin                                                                                                                | 0.800 | 181.813 | 491.154 | 6.15E-05 | 9.36E-05 | 1.033 | 0.0023 | 0.0099 | 0.657 | -0.607  |
| 151 | 4',5,6-Trimethylscutellarein<br>7-glucoside                                                                                       | 0.800 | 181.813 | 491.154 | 6.15E-05 | 9.36E-05 | 1.033 | 0.0023 | 0.0099 | 0.657 | -0.607  |
| 151 | 4'-Methylliquiritigenin<br>7-rhamnoside                                                                                           | 0.410 | 143.305 | 417.154 | 5.38E-08 | 1.03E-05 | 3.720 | 0.0073 | 0.0232 | 0.005 | -7.583  |
| 152 | Feruloyl-2-hydroxyputrescine                                                                                                      | 1.000 | 152.309 | 281.149 | 4.88E-06 | 8.05E-05 | 2.809 | 0.0000 | 0.0005 | 0.061 | -4.043  |
| 153 | 3-(2-Hydroxyphenyl)propanoic acid                                                                                                 | 0.821 | 117.611 | 165.055 | 1.02E-04 | 3.12E-04 | 2.162 | 0.0312 | 0.0310 | 0.325 | -1.620  |
| 154 | 3,3',4'5'-Tetrahydroxystilbene                                                                                                    | 0.933 | 116.753 | 243.066 | 1.42E-05 | 7.49E-05 | 2.029 | 0.0002 | 0.0011 | 0.190 | -2.396  |
| 155 | Pyrocatechol                                                                                                                      | 0.993 | 44.801  | 109.028 | 3.69E-05 | 2.15E-04 | 2.093 | 0.0002 | 0.0011 | 0.172 | -2.540  |
| 156 | Maltol                                                                                                                            | 1.000 | 69.911  | 127.039 | 9.45E-05 | 1.26E-03 | 2.612 | 0.0000 | 0.0000 | 0.075 | -3.731  |
| 157 | Phlorin                                                                                                                           | 0.994 | 164.109 | 289.091 | 4.75E-04 | 5.99E-03 | 2.585 | 0.0002 | 0.0021 | 0.079 | -3.658  |
| 158 | Quinic acid                                                                                                                       | 0.986 | 356.415 | 191.055 | 2.82E-05 | 4.94E-05 | 1.156 | 0.0025 | 0.0074 | 0.571 | -0.809  |
| 159 | Glucose 1-phosphate                                                                                                               | 0.559 | 476.469 | 259.022 | 6.95E-07 | 1.01E-04 | 3.648 | 0.0099 | 0.0189 | 0.007 | -7.183  |
| 160 | 3-(4-Hydroxyphenyl)-1-propanol                                                                                                    | 0.509 | 34.180  | 153.091 | 6.49E-06 | 1.53E-05 | 1.500 | 0.0000 | 0.0006 | 0.424 | -1.237  |
| 161 | 4-Aminophenol                                                                                                                     | 0.944 | 51.147  | 110.060 | 7.71E-05 | 2.77E-04 | 1.823 | 0.0162 | 0.0407 | 0.278 | -1.848  |
| 162 | Cytidine                                                                                                                          | 0.985 | 261.061 | 242.078 | 1.55E-05 | 2.93E-05 | 1.256 | 0.0002 | 0.0014 | 0.527 | -0.923  |
| 163 | Deoxyinosine                                                                                                                      | 0.868 | 197.586 | 251.078 | 2.54E-05 | 4.56E-05 | 1.192 | 0.0022 | 0.0066 | 0.556 | -0.846  |
| 164 | 3'-AMP                                                                                                                            | 0.861 | 428.259 | 346.056 | 2.25E-07 | 8.22E-06 | 3.094 | 0.0146 | 0.0232 | 0.027 | -5.191  |
| 165 | Cytarabine                                                                                                                        | 1.000 | 260.517 | 244.093 | 6.75E-05 | 1.08E-04 | 1.106 | 0.0043 | 0.0157 | 0.626 | -0.677  |
| 166 | Guanosine                                                                                                                         | 0.995 | 285.853 | 284.099 | 1.44E-04 | 2.33E-04 | 1.121 | 0.0001 | 0.0011 | 0.619 | -0.692  |
| 167 | 1-Methyladenosine                                                                                                                 | 0.987 | 132.484 | 282.120 | 1.15E-05 | 1.15E-04 | 2.465 | 0.0004 | 0.0030 | 0.100 | -3.324  |
| 168 | 5'-Methylthioadenosine                                                                                                            | 0.975 | 93.396  | 298.096 | 3.81E-04 | 2.29E-03 | 2.175 | 0.0000 | 0.0000 | 0.166 | -2.589  |
| 169 | Adenosine 2'-phosphate                                                                                                            | 0.964 | 428.737 | 348.070 | 2.84E-06 | 1.64E-05 | 2.149 | 0.0001 | 0.0012 | 0.173 | -2.533  |
| 170 | Guanosine monophosphate                                                                                                           | 0.958 | 479.913 | 364.065 | 2.79E-06 | 9.90E-06 | 1.813 | 0.0133 | 0.0354 | 0.282 | -1.828  |
| 171 | 1-Methylguanine                                                                                                                   | 0.481 | 205.999 | 166.072 | 2.91E-04 | 7.98E-04 | 1.619 | 0.0005 | 0.0037 | 0.365 | -1.455  |
| 172 | Thymidine                                                                                                                         | 0.989 | 93.249  | 241.082 | 1.70E-05 | 4.42E-05 | 1.539 | 0.0003 | 0.0015 | 0.385 | -1.378  |
| 173 | Nicotinic acid                                                                                                                    | 0.711 | 239.168 | 122.024 | 8.76E-05 | 1.43E-04 | 1.101 | 0.0000 | 0.0004 | 0.614 | -0.703  |
| 174 | Guanine                                                                                                                           | 0.998 | 285.853 | 152.057 | 2.36E-04 | 4.09E-04 | 1.200 | 0.0002 | 0.0016 | 0.576 | -0.796  |
| 175 | FAPy-adenine                                                                                                                      | 0.951 | 188.880 | 154.072 | 1.82E-05 | 1.71E-04 | 2.434 | 0.0000 | 0.0000 | 0.106 | -3.238  |
| 176 | Dihydrouracil                                                                                                                     | 0.831 | 60.773  | 115.050 | 9.30E-06 | 1.28E-04 | 2.629 | 0.0000 | 0.0001 | 0.073 | -3.781  |
| 177 | Citicoline                                                                                                                        | 0.849 | 462.516 | 489.115 | 2.86E-05 | 5.85E-05 | 1.324 | 0.0240 | 0.0534 | 0.489 | -1.033  |
| 178 | alpha-Mangostin                                                                                                                   | 0.459 | 295.024 | 409.165 | 1.26E-06 | 4.24E-06 | 1.690 | 0.0245 | 0.0287 | 0.297 | -1.752  |
| 179 | 2-Hydroxypyridine                                                                                                                 | 0.999 | 52.794  | 96.045  | 4.50E-05 | 3.41E-04 | 2.309 | 0.0000 | 0.0000 | 0.132 | -2.919  |
| 180 | Niacinamide                                                                                                                       | 0.995 | 60.806  | 123.055 | 3.23E-04 | 8.95E-03 | 2.960 | 0.0000 | 0.0000 | 0.036 | -4.793  |

|     |                                                    |       |         |         |          |          |       |        |        |       |        |
|-----|----------------------------------------------------|-------|---------|---------|----------|----------|-------|--------|--------|-------|--------|
| 181 | 5-(2-Hydroxyethyl)-4-methylthiazole                | 0.985 | 48.170  | 144.048 | 2.16E-05 | 8.53E-05 | 1.874 | 0.0028 | 0.0115 | 0.253 | -1.981 |
| 182 | 7-Hydroxymethyl-12-methylbenz[a]anthracene sulfate | 0.977 | 70.362  | 353.084 | 1.35E-05 | 1.57E-04 | 2.522 | 0.0241 | 0.0536 | 0.086 | -3.533 |
| 183 | Beta-Carboline                                     | 0.918 | 50.130  | 169.076 | 1.46E-05 | 2.26E-05 | 1.060 | 0.0003 | 0.0023 | 0.648 | -0.625 |
| 184 | 9-(beta-D-Ribofuranosyl)zeatin                     | 0.762 | 136.573 | 352.160 | 3.87E-07 | 1.23E-05 | 3.111 | 0.0002 | 0.0016 | 0.031 | -4.992 |
| 185 | Oroselone                                          | 0.752 | 160.403 | 227.070 | 7.68E-06 | 1.92E-05 | 1.488 | 0.0164 | 0.0409 | 0.401 | -1.319 |
| 186 | 5-(2-Furanyl)-3,4-dihydro-2H-pyrrole               | 0.746 | 103.907 | 136.076 | 5.44E-05 | 9.15E-05 | 1.154 | 0.0014 | 0.0071 | 0.594 | -0.751 |
| 187 | Theaspirone A                                      | 0.710 | 197.130 | 209.153 | 5.86E-05 | 9.03E-05 | 1.041 | 0.0029 | 0.0119 | 0.649 | -0.625 |
| 188 | Benzo-furan                                        | 0.536 | 325.574 | 119.049 | 1.20E-05 | 3.10E-05 | 1.527 | 0.0119 | 0.0328 | 0.388 | -1.366 |
| 189 | 2-Benzofurancarboxaldehyde                         | 0.813 | 325.745 | 147.044 | 2.07E-05 | 3.14E-05 | 1.036 | 0.0005 | 0.0035 | 0.660 | -0.599 |
| 190 | Pyridoxal                                          | 0.649 | 69.656  | 168.065 | 2.70E-05 | 4.88E-05 | 1.226 | 0.0222 | 0.0506 | 0.554 | -0.852 |
| 191 | Xanthine                                           | 0.965 | 233.541 | 151.025 | 3.03E-05 | 1.18E-04 | 1.840 | 0.0000 | 0.0003 | 0.256 | -1.966 |
| 192 | Betaine                                            | 0.999 | 293.780 | 118.086 | 1.34E-03 | 2.11E-03 | 1.081 | 0.0002 | 0.0022 | 0.638 | -0.648 |
| 193 | 3-Isoxazolidinone                                  | 0.999 | 397.408 | 88.040  | 2.49E-05 | 4.75E-05 | 1.287 | 0.0007 | 0.0047 | 0.525 | -0.929 |
| 194 | Pyrrolidonecarboxylic acid                         | 1.000 | 320.278 | 128.034 | 9.97E-04 | 2.71E-03 | 1.583 | 0.0000 | 0.0001 | 0.368 | -1.441 |
| 195 | Oxoglutaric acid                                   | 0.989 | 388.681 | 145.013 | 1.93E-04 | 2.97E-04 | 1.019 | 0.0021 | 0.0064 | 0.649 | -0.623 |
| 196 | Phenylpyruvic acid                                 | 0.937 | 186.597 | 163.039 | 4.79E-04 | 8.45E-04 | 1.190 | 0.0001 | 0.0005 | 0.567 | -0.818 |
| 197 | 3-(4-hydroxy-3-methoxyphenyl)prop-2-enoic acid     | 0.851 | 167.700 | 193.050 | 5.24E-05 | 1.83E-04 | 1.771 | 0.0020 | 0.0063 | 0.286 | -1.807 |
| 198 | 2-Pyrrolidineacetic acid                           | 0.995 | 65.210  | 130.086 | 4.90E-05 | 1.60E-04 | 1.756 | 0.0009 | 0.0053 | 0.306 | -1.710 |
| 199 | Sebiferic acid                                     | 0.617 | 303.963 | 441.373 | 8.19E-05 | 1.41E-04 | 1.152 | 0.0052 | 0.0182 | 0.580 | -0.787 |
| 200 | Cinnacsiol C3                                      | 0.728 | 420.665 | 383.203 | 9.71E-06 | 2.54E-05 | 1.564 | 0.0017 | 0.0081 | 0.382 | -1.387 |
| 201 | Jujubasaponin VI                                   | 0.393 | 270.451 | 797.468 | 1.91E-04 | 4.45E-04 | 1.466 | 0.0007 | 0.0046 | 0.429 | -1.220 |
| 202 | Jujubasaponin IV                                   | 0.352 | 306.007 | 943.524 | 4.69E-04 | 7.95E-04 | 1.127 | 0.0332 | 0.0663 | 0.590 | -0.761 |
| 203 | Sandosaponin B                                     | 0.343 | 317.124 | 957.506 | 1.31E-05 | 4.97E-05 | 1.855 | 0.0008 | 0.0049 | 0.264 | -1.921 |
| 204 | 5-Phenyl-1,3-oxazinane-2,4-dione                   | 0.936 | 50.640  | 192.065 | 7.28E-06 | 1.42E-05 | 1.282 | 0.0061 | 0.0203 | 0.513 | -0.962 |
| 205 | 2-Pyrrolidinone                                    | 0.912 | 394.397 | 86.061  | 8.22E-04 | 1.52E-03 | 1.268 | 0.0000 | 0.0003 | 0.542 | -0.883 |
| 206 | 3-[(3-Methylbutyl)nitrosoamino]-2-butanone         | 0.576 | 495.802 | 187.144 | 4.80E-05 | 1.46E-04 | 1.710 | 0.0000 | 0.0003 | 0.328 | -1.609 |
| 207 | (3R,8E)-3-Hydroxy-5,8-megastigmadien-7-one         | 0.560 | 229.045 | 209.153 | 1.31E-04 | 2.02E-04 | 1.070 | 0.0000 | 0.0001 | 0.647 | -0.627 |
| 208 | O-Phosphoethanolamine                              | 0.998 | 489.014 | 140.011 | 1.11E-05 | 2.02E-05 | 1.123 | 0.0361 | 0.0324 | 0.550 | -0.864 |
| 209 | Methyl acrylate                                    | 0.991 | 395.225 | 87.045  | 7.98E-04 | 1.40E-03 | 1.218 | 0.0000 | 0.0006 | 0.568 | -0.815 |
| 210 | Ethylparaben                                       | 0.585 | 45.843  | 165.055 | 4.18E-05 | 2.09E-04 | 2.007 | 0.0000 | 0.0003 | 0.200 | -2.323 |

Note: rt is the chromatographic retention time of the substance; Mass is the exact molecular weight of the metabolite; score is the match with the substance in the database; The MEAN r is the relative quantitative mean of the substances in the unprocessed black bean group; The MEAN ops is the relative quantitative mean of the substances in the steamed black bean group; VIP is the variable projection importance obtained by the OPLS-DA model of the comparison in this group; P-VALUE is the P value obtained by the t-test of the comparison in this group, P value = the probability that the hypothesis is correct but rejected = the number of negative results / the total number of results, which is a test probability for the sample data; Q-VALUE is the hypothesis test statistic (P value) after correction for multiple hypothesis testing The result of , Q value = probability of being



rejected but correct = number of false positive results / number of presumed positive results, which is a test probability for the inference obtained by the t test, and a re-statistic for the P value; FOLD CHANGE is the fold relationship of the substance in the comparison between the two groups of experiments; LOG\_FOLDCHANGE FOLD CHANGE is the logarithm with the base 2, "-" means the relative content is low.

**Table S4 List of differential metabolites between cooked black soybeans and Steamed black soybeans**

|    | Name                                                                                      | score | rt      | mz      | MEAN<br>ops | MEAN p   | VIP   | P-VAL<br>UE | Q-VA<br>LUE | FOLD<br>CHAN<br>GE | LOG_FO<br>LDCHA<br>NGE |
|----|-------------------------------------------------------------------------------------------|-------|---------|---------|-------------|----------|-------|-------------|-------------|--------------------|------------------------|
| 1  | L-Proline                                                                                 | 0.999 | 333.297 | 114.055 | 3.97E-04    | 1.72E-04 | 1.464 | 0.0014      | 0.0080      | 2.302              | 1.203                  |
| 2  | L-Glutamic acid                                                                           | 0.993 | 417.911 | 146.045 | 2.85E-03    | 1.61E-03 | 1.195 | 0.0008      | 0.0061      | 1.770              | 0.824                  |
| 3  | L-Asparagine                                                                              | 0.993 | 398.701 | 131.045 | 1.04E-04    | 2.91E-06 | 3.496 | 0.0026      | 0.0111      | 35.576             | 5.153                  |
| 4  | L-Tyrosine                                                                                | 0.962 | 326.112 | 182.081 | 8.35E-04    | 3.84E-04 | 1.315 | 0.0001      | 0.0001      | 2.172              | 1.119                  |
| 5  | D-Alanyl-D-alanine                                                                        | 0.960 | 338.297 | 159.076 | 7.47E-05    | 3.85E-05 | 1.223 | 0.0164      | 0.0262      | 1.941              | 0.957                  |
| 6  | N-Acetyl-leucine                                                                          | 0.887 | 219.207 | 172.097 | 1.73E-04    | 7.39E-05 | 1.447 | 0.0412      | 0.0315      | 2.344              | 1.229                  |
| 7  | Epsilon-(gamma-Glutamyl)-lysine                                                           | 0.744 | 510.723 | 276.155 | 2.31E-06    | 6.22E-07 | 1.796 | 0.0190      | 0.0094      | 3.720              | 1.895                  |
| 8  | L-Phenylalanine                                                                           | 0.998 | 281.562 | 166.086 | 5.59E-03    | 3.49E-03 | 1.020 | 0.0003      | 0.0002      | 1.599              | 0.677                  |
| 9  | Glycine                                                                                   | 0.939 | 260.086 | 283.061 | 1.26E-03    | 5.68E-04 | 1.425 | 0.0149      | 0.0255      | 2.224              | 1.153                  |
| 10 | D-Glutamine                                                                               | 0.947 | 396.057 | 145.061 | 3.07E-05    | 6.24E-06 | 2.016 | 0.0001      | 0.0026      | 4.918              | 2.298                  |
| 11 | Isoleucyl-Serine                                                                          | 0.984 | 281.566 | 219.133 | 1.30E-04    | 5.20E-05 | 1.396 | 0.0287      | 0.0137      | 2.498              | 1.321                  |
| 12 | 3-Methylhistidine                                                                         | 0.962 | 404.297 | 170.092 | 9.25E-04    | 5.51E-04 | 1.073 | 0.0005      | 0.0003      | 1.679              | 0.747                  |
| 13 | Leucyl-Tyrosine                                                                           | 0.932 | 231.431 | 295.165 | 2.79E-05    | 8.07E-06 | 1.659 | 0.0039      | 0.0022      | 3.458              | 1.790                  |
| 14 | (alpha-D-mannosyl)7-beta-D-mannosyl-diacetylchitobiosyl-L-asparagine, isoform A (protein) | 1.000 | 368.834 | 90.055  | 8.60E-04    | 3.48E-04 | 1.425 | 0.0000      | 0.0001      | 2.472              | 1.305                  |
| 15 | 4,5-Dihydroorotic acid                                                                    | 0.736 | 176.453 | 157.026 | 5.49E-05    | 3.37E-05 | 1.065 | 0.0124      | 0.0240      | 1.630              | 0.705                  |
| 16 | gamma-Glutamylglutamic acid                                                               | 0.586 | 474.535 | 277.103 | 7.48E-05    | 3.87E-05 | 1.179 | 0.0052      | 0.0029      | 1.932              | 0.950                  |
| 17 | Histidinal                                                                                | 0.836 | 152.336 | 140.082 | 1.86E-04    | 9.10E-05 | 1.270 | 0.0000      | 0.0001      | 2.049              | 1.035                  |
| 18 | Histidiny-Phenylalanine                                                                   | 0.773 | 300.749 | 303.144 | 4.88E-06    | 5.56E-07 | 2.265 | 0.0002      | 0.0001      | 8.784              | 3.135                  |
| 19 | Isoleucyl-Tryptophan                                                                      | 0.643 | 210.846 | 318.181 | 4.57E-05    | 2.21E-05 | 1.245 | 0.0020      | 0.0011      | 2.066              | 1.047                  |
| 20 | L-Tryptophan                                                                              | 0.526 | 74.867  | 203.082 | 4.83E-04    | 2.49E-04 | 1.281 | 0.0013      | 0.0078      | 1.940              | 0.956                  |
| 21 | N6-Acetyl-L-lysine                                                                        | 0.750 | 371.344 | 189.123 | 1.20E-04    | 5.70E-05 | 1.290 | 0.0001      | 0.0001      | 2.115              | 1.080                  |
| 22 | Phenylalanyl-Gamma-glutamate                                                              | 0.710 | 283.277 | 294.145 | 3.98E-06    | 8.77E-07 | 1.812 | 0.0089      | 0.0047      | 4.535              | 2.181                  |
| 23 | Prolyl-Gamma-glutamate                                                                    | 0.579 | 448.928 | 244.140 | 1.37E-05    | 6.35E-06 | 1.310 | 0.0002      | 0.0002      | 2.164              | 1.113                  |
| 24 | Tryptophyl-Methionine                                                                     | 0.578 | 219.271 | 336.137 | 4.21E-07    | 6.61E-08 | 2.034 | 0.0131      | 0.0067      | 6.369              | 2.671                  |
| 25 | Tryptophyl-Tyrosine                                                                       | 0.817 | 430.260 | 368.156 | 2.78E-06    | 6.61E-08 | 2.897 | 0.0049      | 0.0027      | 42.016             | 5.393                  |
| 26 | Tyrosyl-Alanine                                                                           | 0.729 | 268.206 | 253.118 | 1.24E-05    | 6.10E-06 | 1.254 | 0.0003      | 0.0002      | 2.037              | 1.026                  |
| 27 | Tyrosyl-Aspartate                                                                         | 0.636 | 392.509 | 297.108 | 2.83E-06    | 1.32E-06 | 1.216 | 0.0363      | 0.0169      | 2.146              | 1.101                  |
| 28 | Tyrosyl-Gamma-glutamate                                                                   | 0.590 | 320.991 | 310.139 | 2.18E-06    | 5.73E-07 | 1.684 | 0.0078      | 0.0042      | 3.800              | 1.926                  |
| 29 | Tyrosyl-Glutamine                                                                         | 0.709 | 86.130  | 310.139 | 5.05E-05    | 2.86E-05 | 1.113 | 0.0013      | 0.0007      | 1.766              | 0.820                  |
| 30 | Tyrosyl-Phenylalanine                                                                     | 0.707 | 215.498 | 329.149 | 2.40E-05    | 1.93E-06 | 2.489 | 0.0324      | 0.0152      | 12.432             | 3.636                  |
| 31 | Tyrosyl-Threonine                                                                         | 0.820 | 281.561 | 283.128 | 1.05E-05    | 3.25E-06 | 1.607 | 0.0011      | 0.0007      | 3.226              | 1.690                  |
| 32 | Tyrosyl-Tryptophan                                                                        | 0.768 | 229.660 | 368.160 | 2.83E-06    | 3.97E-07 | 2.113 | 0.0063      | 0.0034      | 7.136              | 2.835                  |
| 33 | Valyl-Asparagine                                                                          | 0.669 | 331.395 | 232.129 | 6.59E-06    | 2.04E-06 | 1.604 | 0.0021      | 0.0012      | 3.234              | 1.693                  |
| 34 | Valyl-Tryptophan                                                                          | 0.571 | 217.277 | 304.165 | 6.21E-06    | 8.89E-07 | 2.193 | 0.0074      | 0.0040      | 6.983              | 2.804                  |
| 35 | 4-Methoxybenzyl glucoside                                                                 | 0.469 | 141.861 | 301.129 | 4.10E-05    | 1.62E-05 | 1.427 | 0.0023      | 0.0013      | 2.535              | 1.342                  |
| 36 | 4'-Methylquiritigenin                                                                     | 0.410 | 143.305 | 417.154 | 1.03E-05    | 6.61E-08 | 3.368 | 0.0073      | 0.0039      | 156.06             | 7.286                  |

|    |                                                                                                                                   |       |         |         |          |          |       |        |        |             |       |
|----|-----------------------------------------------------------------------------------------------------------------------------------|-------|---------|---------|----------|----------|-------|--------|--------|-------------|-------|
|    | 7-rhamnoside                                                                                                                      |       |         |         |          |          |       |        |        | 6           |       |
| 37 | Aldehydo-D-xylose                                                                                                                 | 0.764 | 336.445 | 149.044 | 3.83E-04 | 2.31E-04 | 1.116 | 0.0021 | 0.0099 | 1.661       | 0.732 |
| 38 | Gluconic acid                                                                                                                     | 0.913 | 396.520 | 195.050 | 1.72E-03 | 9.73E-04 | 1.183 | 0.0020 | 0.0098 | 1.764       | 0.819 |
| 39 | Hydroxytyrosol 1-O-glucoside                                                                                                      | 0.841 | 204.073 | 317.126 | 1.81E-06 | 3.39E-07 | 1.931 | 0.0032 | 0.0018 | 5.352       | 2.420 |
| 40 | L-Arabitol                                                                                                                        | 0.993 | 97.798  | 151.060 | 1.57E-04 | 9.47E-05 | 1.132 | 0.0003 | 0.0036 | 1.660       | 0.732 |
| 41 | Marmesin rhamnoside                                                                                                               | 0.411 | 93.043  | 393.151 | 8.21E-05 | 3.97E-05 | 1.260 | 0.0008 | 0.0005 | 2.066       | 1.047 |
| 42 | Melibiose                                                                                                                         | 0.467 | 416.475 | 360.150 | 3.75E-04 | 1.09E-04 | 1.671 | 0.0207 | 0.0102 | 3.428       | 1.777 |
| 43 | N-Acetyl-glucosamine<br>1-phosphate                                                                                               | 0.594 | 464.383 | 300.049 | 3.15E-05 | 1.45E-05 | 1.289 | 0.0416 | 0.0316 | 2.176       | 1.122 |
| 44 | Rhamnose                                                                                                                          | 0.782 | 151.216 | 163.060 | 1.30E-04 | 6.46E-05 | 1.326 | 0.0005 | 0.0049 | 2.006       | 1.005 |
| 45 | Threonic acid                                                                                                                     | 0.915 | 334.521 | 135.029 | 3.55E-04 | 1.11E-04 | 1.732 | 0.0000 | 0.0007 | 3.213       | 1.684 |
| 46 | 2-Methylglutaric acid                                                                                                             | 0.846 | 72.160  | 145.050 | 2.09E-04 | 1.29E-04 | 1.050 | 0.0309 | 0.0302 | 1.625       | 0.701 |
| 47 | 2-Oxo-4-methylthiobutanoic acid                                                                                                   | 0.847 | 389.364 | 149.027 | 5.88E-06 | 1.08E-06 | 2.364 | 0.0180 | 0.0090 | 5.432       | 2.442 |
| 48 | Itaconic acid                                                                                                                     | 0.973 | 66.828  | 129.018 | 9.80E-04 | 6.06E-04 | 1.080 | 0.0259 | 0.0292 | 1.619       | 0.695 |
| 49 | Mesaconic acid                                                                                                                    | 0.994 | 467.967 | 129.018 | 8.04E-04 | 4.75E-04 | 1.146 | 0.0110 | 0.0230 | 1.692       | 0.759 |
| 50 | Methylsuccinic acid                                                                                                               | 0.984 | 374.444 | 131.034 | 4.78E-05 | 1.29E-05 | 2.092 | 0.0148 | 0.0254 | 3.718       | 1.894 |
| 51 | Dihydrozeatin-O-glucoside                                                                                                         | 0.800 | 411.501 | 384.187 | 4.34E-06 | 8.76E-07 | 1.889 | 0.0010 | 0.0006 | 4.954       | 2.309 |
| 52 | Isopentyl beta-D-glucoside                                                                                                        | 0.727 | 159.254 | 251.150 | 2.20E-05 | 1.14E-05 | 1.127 | 0.0347 | 0.0162 | 1.927       | 0.947 |
| 53 | Jasmonic acid                                                                                                                     | 0.988 | 100.604 | 209.117 | 5.49E-06 | 1.85E-06 | 1.603 | 0.0104 | 0.0225 | 2.963       | 1.567 |
| 54 | Glycerol 3-phosphate                                                                                                              | 0.849 | 453.589 | 171.005 | 9.24E-05 | 9.58E-08 | 4.211 | 0.0007 | 0.0058 | 964.15<br>1 | 9.913 |
| 55 | 5,7-Dihydroxy-2',6-dimethoxyiso<br>flavone 7-rhamnoside                                                                           | 0.541 | 190.466 | 461.144 | 3.34E-04 | 2.06E-04 | 1.032 | 0.0005 | 0.0003 | 1.616       | 0.693 |
| 56 | 6'-Malonyltrifolirhizin                                                                                                           | 0.844 | 260.005 | 533.128 | 9.54E-04 | 4.08E-04 | 1.363 | 0.0004 | 0.0002 | 2.336       | 1.224 |
| 57 | 6"-O-Acetylglycitin                                                                                                               | 0.946 | 62.523  | 489.139 | 6.30E-04 | 3.10E-04 | 1.260 | 0.0001 | 0.0001 | 2.031       | 1.022 |
| 58 | Genistein                                                                                                                         | 0.999 | 37.315  | 269.045 | 3.27E-03 | 9.46E-04 | 1.764 | 0.0039 | 0.0138 | 3.456       | 1.789 |
| 59 | Glycitin                                                                                                                          | 0.847 | 201.651 | 445.113 | 6.52E-05 | 2.88E-05 | 1.427 | 0.0008 | 0.0059 | 2.265       | 1.179 |
| 60 | 2-(3,4-dihydroxyphenyl)-3,5-dihy<br>droxy-7-methoxy-4H-chromen-4-<br>one                                                          | 0.880 | 51.974  | 315.051 | 6.95E-04 | 3.87E-05 | 2.729 | 0.0039 | 0.0137 | 17.934      | 4.165 |
| 61 | 2-(3,4-dihydroxyphenyl)-5,7-dihy<br>droxy-6-[3,4,5-trihydroxy-6-(hyd<br>roxymethyl)oxan-2-yl]-4H-chrom<br>en-4-one                | 0.675 | 278.916 | 449.107 | 3.49E-05 | 4.83E-06 | 2.103 | 0.0010 | 0.0006 | 7.220       | 2.852 |
| 62 | 4',5,6-Trimethylscutellarein<br>7-glucoside                                                                                       | 0.800 | 181.813 | 491.154 | 9.36E-05 | 3.78E-05 | 1.423 | 0.0001 | 0.0001 | 2.475       | 1.307 |
| 63 | 5,7-dihydroxy-2-(4-hydroxy-3-m<br>ethoxyphenyl)-3-{{[3,4,5-trihydro<br>xy-6-(hydroxymethyl)oxan-2-yl]o<br>xy}-4H-chromen-4-one    | 0.782 | 179.797 | 477.104 | 5.01E-05 | 2.03E-05 | 1.500 | 0.0038 | 0.0136 | 2.468       | 1.303 |
| 64 | 5,7-dihydroxy-2-phenyl-6-[3,4,5-t<br>rihydroxy-6-(hydroxymethyl)oxa<br>n-2-yl]-8-(3,4,5-trihydroxyoxan-2<br>-yl)-4H-chromen-4-one | 0.408 | 81.574  | 547.145 | 3.55E-04 | 2.21E-04 | 1.069 | 0.0033 | 0.0124 | 1.602       | 0.680 |

|     |                                                           |       |         |         |          |          |       |        |        |              |        |
|-----|-----------------------------------------------------------|-------|---------|---------|----------|----------|-------|--------|--------|--------------|--------|
| 65  | Citrusinine II                                            | 0.448 | 60.782  | 288.086 | 1.07E-04 | 5.52E-05 | 1.155 | 0.0110 | 0.0057 | 1.938        | 0.954  |
| 66  | Cosmosiin                                                 | 0.996 | 201.839 | 433.112 | 1.17E-04 | 6.75E-05 | 1.038 | 0.0256 | 0.0123 | 1.734        | 0.794  |
| 67  | Epicatechin                                               | 0.938 | 176.579 | 291.086 | 1.99E-06 | 6.61E-08 | 2.741 | 0.0469 | 0.0212 | 30.109       | 4.912  |
| 68  | Isorhamnetin                                              | 0.981 | 192.786 | 317.066 | 3.72E-05 | 1.85E-05 | 1.219 | 0.0024 | 0.0014 | 2.010        | 1.007  |
| 69  | Luteolin 7-galactoside                                    | 0.944 | 241.710 | 449.107 | 2.82E-04 | 5.76E-05 | 1.867 | 0.0025 | 0.0015 | 4.905        | 2.294  |
| 70  | Naringin                                                  | 0.653 | 224.806 | 579.172 | 2.22E-04 | 9.58E-08 | 4.471 | 0.0015 | 0.0082 | 2314.0<br>12 | 11.176 |
| 71  | Peonidin-3-glucoside                                      | 0.990 | 153.425 | 463.123 | 5.95E-05 | 2.66E-05 | 1.262 | 0.0252 | 0.0122 | 2.234        | 1.159  |
| 72  | Phlorizin                                                 | 0.351 | 225.433 | 435.130 | 1.02E-04 | 5.31E-05 | 1.292 | 0.0001 | 0.0021 | 1.914        | 0.937  |
| 73  | Sideritiflavone                                           | 0.989 | 102.955 | 361.091 | 1.14E-05 | 4.48E-06 | 1.376 | 0.0113 | 0.0059 | 2.549        | 1.350  |
| 74  | (E)-3-(4-Hydroxyphenyl)-2-propenal                        | 0.969 | 281.452 | 147.044 | 7.06E-05 | 4.15E-05 | 1.139 | 0.0051 | 0.0161 | 1.702        | 0.767  |
| 75  | Subaphylline                                              | 0.905 | 210.486 | 265.154 | 1.80E-05 | 5.63E-06 | 1.603 | 0.0282 | 0.0134 | 3.187        | 1.672  |
| 76  | Protocatechuic acid                                       | 0.812 | 39.594  | 153.018 | 6.64E-04 | 2.94E-04 | 1.409 | 0.0075 | 0.0196 | 2.259        | 1.176  |
| 77  | Acetaminophen                                             | 0.937 | 102.583 | 152.070 | 2.81E-04 | 1.45E-04 | 1.201 | 0.0010 | 0.0006 | 1.944        | 0.959  |
| 78  | Gallic acid                                               | 0.649 | 32.854  | 169.013 | 2.17E-04 | 9.42E-05 | 1.456 | 0.0007 | 0.0057 | 2.299        | 1.201  |
| 79  | Phenol                                                    | 0.866 | 325.557 | 95.050  | 1.46E-05 | 1.39E-06 | 2.751 | 0.0016 | 0.0009 | 10.491       | 3.391  |
| 80  | Pyrocatechol                                              | 0.993 | 44.801  | 109.028 | 2.15E-04 | 4.97E-05 | 1.942 | 0.0000 | 0.0016 | 4.317        | 2.110  |
| 81  | Phlorin                                                   | 0.994 | 164.109 | 289.091 | 5.99E-03 | 3.23E-03 | 1.180 | 0.0000 | 0.0001 | 1.856        | 0.892  |
| 82  | 4-Aminophenol                                             | 0.944 | 51.147  | 110.060 | 2.77E-04 | 1.23E-04 | 1.329 | 0.0052 | 0.0029 | 2.253        | 1.172  |
| 83  | Indoxyl                                                   | 0.975 | 144.553 | 134.060 | 2.22E-05 | 1.20E-05 | 1.150 | 0.0035 | 0.0020 | 1.854        | 0.891  |
| 84  | 3,4-Dihydroxycinnamoyl-(Z)-2-(3,4-dihydroxyphenyl)ethanol | 0.590 | 152.353 | 315.085 | 4.20E-05 | 2.23E-05 | 1.185 | 0.0003 | 0.0002 | 1.881        | 0.911  |
| 85  | Glucose 1-phosphate                                       | 0.559 | 476.469 | 259.022 | 1.01E-04 | 1.36E-06 | 3.417 | 0.0097 | 0.0219 | 74.314       | 6.216  |
| 86  | myo-Inositol                                              | 0.900 | 412.688 | 179.055 | 6.03E-04 | 3.45E-04 | 1.190 | 0.0003 | 0.0035 | 1.750        | 0.808  |
| 87  | Quinic acid                                               | 0.986 | 356.415 | 191.055 | 4.94E-05 | 2.83E-05 | 1.181 | 0.0009 | 0.0063 | 1.743        | 0.802  |
| 88  | 1-Methyladenosine                                         | 0.987 | 132.484 | 282.120 | 1.15E-04 | 2.77E-05 | 1.771 | 0.0003 | 0.0002 | 4.160        | 2.057  |
| 89  | 1-Methylguanine                                           | 0.481 | 205.999 | 166.072 | 7.98E-04 | 4.35E-04 | 1.123 | 0.0110 | 0.0057 | 1.834        | 0.875  |
| 90  | 2'-O-Methyladenosine                                      | 0.997 | 99.726  | 282.120 | 2.04E-04 | 7.37E-05 | 1.507 | 0.0000 | 0.0001 | 2.772        | 1.471  |
| 91  | 5-Methylcytidine                                          | 0.989 | 248.189 | 258.108 | 2.54E-06 | 6.61E-08 | 2.848 | 0.0274 | 0.0131 | 38.483       | 5.266  |
| 92  | 5'-Methylthioadenosine                                    | 0.975 | 93.396  | 298.096 | 2.29E-03 | 2.15E-04 | 2.306 | 0.0000 | 0.0001 | 10.644       | 3.412  |
| 93  | Cytarabine                                                | 1.000 | 260.517 | 244.093 | 1.08E-04 | 3.45E-05 | 1.593 | 0.0029 | 0.0017 | 3.132        | 1.647  |
| 94  | Cytidine                                                  | 0.985 | 261.061 | 242.078 | 2.93E-05 | 6.96E-06 | 1.912 | 0.0001 | 0.0023 | 4.214        | 2.075  |
| 95  | Deoxyinosine                                              | 0.868 | 197.586 | 251.078 | 4.56E-05 | 2.62E-05 | 1.145 | 0.0084 | 0.0206 | 1.742        | 0.801  |
| 96  | Guanosine                                                 | 0.995 | 285.853 | 284.099 | 2.33E-04 | 1.27E-04 | 1.151 | 0.0005 | 0.0003 | 1.828        | 0.871  |
| 97  | Guanosine monophosphate                                   | 0.958 | 479.913 | 364.065 | 9.90E-06 | 4.67E-06 | 1.263 | 0.0090 | 0.0048 | 2.119        | 1.083  |
| 98  | Inosine                                                   | 0.999 | 237.500 | 269.087 | 6.83E-06 | 2.43E-06 | 1.491 | 0.0139 | 0.0071 | 2.816        | 1.493  |
| 99  | Pseudouridine                                             | 0.895 | 263.589 | 243.062 | 1.76E-05 | 9.46E-06 | 1.234 | 0.0238 | 0.0287 | 1.866        | 0.900  |
| 100 | Ribitol                                                   | 0.854 | 248.984 | 151.060 | 3.32E-04 | 1.91E-04 | 1.114 | 0.0360 | 0.0309 | 1.743        | 0.802  |
| 101 | Dihydrouracil                                             | 0.831 | 60.773  | 115.050 | 1.28E-04 | 6.83E-05 | 1.183 | 0.0001 | 0.0001 | 1.872        | 0.904  |
| 102 | FAPy-adenine                                              | 0.951 | 188.880 | 154.072 | 1.71E-04 | 8.01E-05 | 1.307 | 0.0000 | 0.0001 | 2.138        | 1.097  |
| 103 | Guanine                                                   | 0.998 | 285.853 | 152.057 | 4.09E-04 | 2.15E-04 | 1.193 | 0.0002 | 0.0001 | 1.900        | 0.926  |
| 104 | Thymidine                                                 | 0.989 | 93.249  | 241.082 | 4.42E-05 | 2.79E-05 | 1.022 | 0.0148 | 0.0254 | 1.584        | 0.664  |
| 105 | Citicoline                                                | 0.849 | 462.516 | 489.115 | 5.85E-05 | 1.89E-05 | 1.593 | 0.0000 | 0.0001 | 3.090        | 1.627  |

|     |                                                  |       |         |         |          |          |       |        |        |         |       |
|-----|--------------------------------------------------|-------|---------|---------|----------|----------|-------|--------|--------|---------|-------|
| 106 | (±)-Conen                                        | 0.629 | 429.360 | 305.076 | 3.04E-05 | 1.59E-05 | 1.170 | 0.0206 | 0.0101 | 1.910   | 0.933 |
| 107 | 1-(beta-D-Ribofuranosyl)-1,4-dihydronicotinamide | 0.590 | 176.033 | 257.113 | 3.21E-05 | 1.05E-05 | 1.549 | 0.0118 | 0.0061 | 3.064   | 1.615 |
| 108 | 1,3-Dihydro-(2H)-indol-2-one                     | 0.994 | 249.072 | 134.060 | 1.94E-05 | 9.84E-06 | 1.173 | 0.0139 | 0.0071 | 1.969   | 0.977 |
| 109 | 1-Pyrroline                                      | 0.999 | 331.963 | 70.066  | 5.85E-06 | 2.45E-06 | 1.375 | 0.0025 | 0.0014 | 2.388   | 1.256 |
| 110 | 2-Hydroxypyridine                                | 0.999 | 52.794  | 96.045  | 3.41E-04 | 1.38E-04 | 1.408 | 0.0015 | 0.0009 | 2.472   | 1.306 |
| 111 | 5-(2-Furanyl)-3,4-dihydro-2H-pyrrole             | 0.746 | 103.907 | 136.076 | 9.15E-05 | 5.70E-05 | 1.023 | 0.0015 | 0.0009 | 1.607   | 0.684 |
| 112 | 5-(2-Hydroxyethyl)-4-methylthiazole              | 0.985 | 48.170  | 144.048 | 8.53E-05 | 4.24E-05 | 1.173 | 0.0182 | 0.0091 | 2.012   | 1.009 |
| 113 | 9-(beta-D-Ribofuranosyl)zeatin                   | 0.762 | 136.573 | 352.160 | 1.23E-05 | 6.61E-08 | 3.429 | 0.0046 | 0.0025 | 186.502 | 7.543 |
| 114 | Benzofuran                                       | 0.536 | 325.574 | 119.049 | 3.10E-05 | 1.72E-06 | 2.996 | 0.0031 | 0.0017 | 17.952  | 4.166 |
| 115 | Bisacurone epoxide                               | 0.697 | 57.045  | 269.174 | 8.93E-06 | 2.90E-06 | 1.531 | 0.0195 | 0.0096 | 3.084   | 1.625 |
| 116 | Diferuloylputrescine                             | 0.808 | 56.704  | 441.201 | 3.12E-06 | 2.12E-07 | 2.514 | 0.0237 | 0.0115 | 14.734  | 3.881 |
| 117 | Herierin IV                                      | 0.391 | 180.397 | 171.065 | 2.80E-05 | 1.30E-05 | 1.301 | 0.0003 | 0.0002 | 2.149   | 1.103 |
| 118 | Isobutyrylglycine                                | 0.989 | 231.568 | 144.065 | 2.87E-06 | 9.58E-08 | 2.952 | 0.0141 | 0.0250 | 30.004  | 4.907 |
| 119 | Niacinamide                                      | 0.995 | 60.806  | 123.055 | 8.95E-03 | 4.82E-03 | 1.164 | 0.0006 | 0.0003 | 1.854   | 0.891 |
| 120 | Sulfamethoxazole<br>N4-hydroxylamine             | 0.898 | 83.156  | 270.052 | 1.38E-05 | 4.87E-06 | 1.483 | 0.0047 | 0.0026 | 2.834   | 1.503 |
| 121 | Imidazole-4-acetaldehyde<br>Vanillin             | 0.751 | 63.761  | 111.055 | 2.78E-03 | 1.65E-03 | 1.072 | 0.0017 | 0.0010 | 1.688   | 0.755 |
| 122 | 3-(L-menthoxy)propane-1,2-diol<br>acetal         | 0.626 | 50.251  | 365.231 | 2.62E-06 | 6.14E-07 | 1.786 | 0.0296 | 0.0140 | 4.273   | 2.095 |
| 123 | 3-Isoxazolidinone                                | 0.999 | 397.408 | 88.040  | 4.75E-05 | 2.30E-06 | 2.712 | 0.0000 | 0.0001 | 20.627  | 4.366 |
| 124 | Hypoxanthine                                     | 1.000 | 236.753 | 137.046 | 5.27E-05 | 1.78E-05 | 1.824 | 0.0242 | 0.0117 | 2.965   | 1.568 |
| 125 | Imidazoleacetic acid                             | 0.894 | 95.257  | 125.034 | 1.16E-04 | 7.47E-05 | 1.060 | 0.0009 | 0.0063 | 1.558   | 0.640 |
| 126 | Xanthine                                         | 0.965 | 233.541 | 151.025 | 1.18E-04 | 3.21E-06 | 3.053 | 0.0000 | 0.0003 | 36.834  | 5.203 |
| 127 | (R)-mandelic Acid                                | 0.482 | 67.757  | 135.044 | 1.14E-05 | 3.59E-06 | 1.601 | 0.0109 | 0.0057 | 3.185   | 1.671 |
| 128 | 3-(4-hydroxy-3-methoxyphenyl)prop-2-enoic acid   | 0.851 | 167.700 | 193.050 | 1.83E-04 | 8.83E-05 | 1.367 | 0.0002 | 0.0028 | 2.076   | 1.054 |
| 129 | Benzoic acid                                     | 0.996 | 326.112 | 123.044 | 8.62E-05 | 3.74E-05 | 1.366 | 0.0000 | 0.0001 | 2.303   | 1.204 |
| 130 | Homovanillic acid                                | 0.881 | 51.639  | 181.050 | 1.31E-03 | 4.24E-04 | 1.698 | 0.0003 | 0.0038 | 3.103   | 1.634 |
| 131 | Isohomovanillic acid                             | 0.500 | 37.922  | 181.050 | 2.04E-04 | 5.93E-05 | 1.785 | 0.0000 | 0.0003 | 3.442   | 1.783 |
| 132 | Oxoglutaric acid                                 | 0.989 | 388.681 | 145.013 | 2.97E-04 | 7.97E-05 | 1.817 | 0.0005 | 0.0049 | 3.728   | 1.898 |
| 133 | Phenylpyruvic acid                               | 0.937 | 186.597 | 163.039 | 8.45E-04 | 4.10E-04 | 1.364 | 0.0000 | 0.0011 | 2.061   | 1.043 |
| 134 | Pyrrolidonecarboxylic acid                       | 1.000 | 320.278 | 128.034 | 2.71E-03 | 1.62E-03 | 1.138 | 0.0003 | 0.0037 | 1.667   | 0.737 |
| 135 | Perilloside C                                    | 0.794 | 441.392 | 317.193 | 1.06E-05 | 4.94E-06 | 1.304 | 0.0000 | 0.0001 | 2.139   | 1.097 |
| 136 | 2-Pyrrolidinone                                  | 0.912 | 394.397 | 86.061  | 1.52E-03 | 4.89E-04 | 1.592 | 0.0000 | 0.0001 | 3.097   | 1.631 |
| 137 | 4-Pyridoxic acid                                 | 0.893 | 47.427  | 184.060 | 7.52E-05 | 4.04E-05 | 1.152 | 0.0061 | 0.0033 | 1.862   | 0.897 |
| 138 | Pyridoxine                                       | 0.966 | 101.418 | 168.066 | 1.72E-04 | 1.02E-04 | 1.145 | 0.0010 | 0.0067 | 1.685   | 0.753 |
| 139 | 4-Dodecylbenzenesulfonic Acid                    | 0.979 | 28.382  | 325.184 | 6.30E-03 | 3.20E-03 | 1.310 | 0.0012 | 0.0073 | 1.973   | 0.980 |
| 140 | Ketoleucine                                      | 0.993 | 58.181  | 129.055 | 1.85E-02 | 1.20E-02 | 1.048 | 0.0005 | 0.0047 | 1.544   | 0.627 |
| 141 | Methyl acrylate                                  | 0.991 | 395.225 | 87.045  | 1.40E-03 | 4.80E-04 | 1.555 | 0.0000 | 0.0001 | 2.928   | 1.550 |

|     |                                          |       |         |         |          |          |       |        |        |       |         |
|-----|------------------------------------------|-------|---------|---------|----------|----------|-------|--------|--------|-------|---------|
| 142 | O-Phosphoethanolamine                    | 0.921 | 488.856 | 142.026 | 3.11E-05 | 1.41E-05 | 1.309 | 0.0026 | 0.0015 | 2.198 | 1.136   |
| 143 | Dihydrolipoate                           | 0.540 | 67.353  | 207.050 | 3.78E-04 | 2.16E-04 | 1.172 | 0.0057 | 0.0171 | 1.756 | 0.812   |
| 144 | 1-deoxy-1-(N6-lysino)-D-fructose         | 0.759 | 424.806 | 132.029 | 3.11E-04 | 7.49E-04 | 1.506 | 0.0000 | 0.0015 | 0.415 | -1.270  |
| 145 | D-Aspartic acid                          | 0.996 | 424.735 | 134.045 | 6.97E-05 | 2.59E-04 | 1.716 | 0.0000 | 0.0001 | 0.269 | -1.893  |
| 146 | L-Pipecolic acid                         | 0.993 | 224.347 | 130.083 | 3.43E-05 | 7.07E-05 | 1.269 | 0.0002 | 0.0001 | 0.485 | -1.043  |
| 147 | gamma-Glutamylvaline                     | 0.607 | 396.464 | 247.129 | 1.04E-04 | 1.65E-04 | 1.013 | 0.0004 | 0.0002 | 0.631 | -0.665  |
| 148 | Histidiny-Asparagine                     | 0.716 | 394.785 | 270.119 | 3.75E-06 | 8.09E-06 | 1.249 | 0.0208 | 0.0102 | 0.464 | -1.107  |
| 149 | Lysyl-Methionine                         | 0.580 | 403.764 | 278.153 | 2.41E-06 | 7.25E-06 | 1.559 | 0.0184 | 0.0091 | 0.332 | -1.590  |
| 150 | N-a-Acetyl-L-arginine                    | 0.853 | 392.121 | 217.129 | 2.77E-04 | 4.58E-04 | 1.050 | 0.0010 | 0.0006 | 0.605 | -0.724  |
| 151 | Seryl-asparagine                         | 0.491 | 377.862 | 220.105 | 4.55E-05 | 8.65E-05 | 1.166 | 0.0063 | 0.0034 | 0.526 | -0.927  |
| 152 | Tryptophyl-Tryptophan                    | 0.550 | 211.644 | 391.175 | 1.78E-05 | 3.36E-05 | 1.163 | 0.0067 | 0.0036 | 0.530 | -0.916  |
| 153 | Trehalose 6-phosphate                    | 0.627 | 497.112 | 421.075 | 6.20E-05 | 1.03E-04 | 1.121 | 0.0032 | 0.0123 | 0.602 | -0.732  |
| 154 | 16-Methylheptadecanoic acid              | 1.000 | 50.084  | 283.264 | 4.00E-04 | 8.17E-04 | 1.229 | 0.0482 | 0.0322 | 0.489 | -1.032  |
| 155 | 6,15-Diketo,13,14-dihydro-PGF1a          | 0.702 | 477.341 | 369.224 | 1.92E-05 | 3.38E-05 | 1.102 | 0.0048 | 0.0027 | 0.568 | -0.815  |
| 156 | 9,10-Epoxyoctadecenoic acid              | 0.991 | 54.675  | 295.227 | 3.09E-04 | 8.21E-04 | 1.584 | 0.0002 | 0.0029 | 0.376 | -1.411  |
| 157 | DG(22:6(4Z,7Z,10Z,13Z,16Z,19Z)/14:0/0:0) | 0.734 | 32.334  | 613.482 | 1.43E-05 | 4.62E-05 | 1.519 | 0.0392 | 0.0181 | 0.309 | -1.695  |
| 158 | Linoleoyl ethanolamide                   | 0.856 | 35.904  | 324.289 | 1.90E-05 | 8.10E-05 | 1.789 | 0.0031 | 0.0017 | 0.235 | -2.089  |
| 159 | LysoPC(14:0/0:0)                         | 0.537 | 228.128 | 468.308 | 8.16E-06 | 3.07E-05 | 1.699 | 0.0057 | 0.0031 | 0.265 | -1.914  |
| 160 | LysoPC(16:1(9Z)/0:0)                     | 0.528 | 225.425 | 494.325 | 1.12E-05 | 3.37E-05 | 1.489 | 0.0270 | 0.0130 | 0.332 | -1.592  |
| 161 | LysoPC(18:2(9Z,12Z))                     | 0.630 | 255.392 | 520.335 | 5.20E-08 | 9.24E-07 | 2.506 | 0.0455 | 0.0206 | 0.056 | -4.151  |
| 162 | LysoPC(18:3(6Z,9Z,12Z))                  | 0.534 | 225.366 | 518.324 | 3.89E-04 | 8.27E-04 | 1.235 | 0.0206 | 0.0101 | 0.471 | -1.087  |
| 163 | LysoPE(16:0/0:0)                         | 0.964 | 229.741 | 454.293 | 1.32E-04 | 4.26E-04 | 1.551 | 0.0237 | 0.0115 | 0.309 | -1.695  |
| 164 | LysoPE(18:1(9Z)/0:0)                     | 0.717 | 226.994 | 480.309 | 3.32E-05 | 9.92E-05 | 1.449 | 0.0404 | 0.0186 | 0.335 | -1.580  |
| 165 | LysoPE(20:5(5Z,8Z,11Z,14Z,17Z)/0:0)      | 0.850 | 228.739 | 500.275 | 4.00E-06 | 8.70E-06 | 1.247 | 0.0310 | 0.0147 | 0.460 | -1.120  |
| 166 | Myristic acid                            | 1.000 | 51.084  | 227.201 | 1.25E-04 | 2.07E-04 | 1.051 | 0.0362 | 0.0310 | 0.606 | -0.723  |
| 167 | PS(18:0/22:6(4Z,7Z,10Z,13Z,16Z,19Z))     | 0.815 | 178.600 | 836.541 | 7.61E-07 | 2.40E-05 | 2.789 | 0.0228 | 0.0111 | 0.032 | -4.980  |
| 168 | Ricinoleic acid                          | 0.999 | 55.227  | 297.242 | 1.39E-04 | 2.45E-04 | 1.178 | 0.0072 | 0.0193 | 0.567 | -0.820  |
| 169 | 10E,12Z-Octadecadienoic acid             | 1.000 | 50.022  | 279.232 | 2.30E-03 | 6.65E-03 | 1.620 | 0.0064 | 0.0182 | 0.345 | -1.534  |
| 170 | 13-OxoODE                                | 0.989 | 38.051  | 293.212 | 9.99E-05 | 3.10E-04 | 1.694 | 0.0003 | 0.0034 | 0.322 | -1.633  |
| 171 | Alpha-Linolenic acid                     | 1.000 | 50.315  | 277.217 | 4.52E-04 | 1.49E-03 | 1.727 | 0.0037 | 0.0134 | 0.304 | -1.717  |
| 172 | 1-Palmitoylglycerophosphoinositol        | 0.884 | 273.602 | 573.302 | 3.02E-05 | 9.54E-05 | 1.548 | 0.0168 | 0.0084 | 0.317 | -1.657  |
| 173 | LysoPE(18:3(6Z,9Z,12Z)/0:0)              | 0.922 | 230.628 | 476.277 | 4.04E-05 | 9.40E-05 | 1.364 | 0.0013 | 0.0008 | 0.430 | -1.218  |
| 174 | Calendulaglycoside E                     | 0.453 | 262.060 | 795.450 | 4.21E-05 | 9.48E-05 | 1.335 | 0.0010 | 0.0006 | 0.445 | -1.170  |
| 175 | 11-Methylgerberinol                      | 0.998 | 405.415 | 379.121 | 2.35E-04 | 4.10E-04 | 1.112 | 0.0081 | 0.0043 | 0.574 | -0.802  |
| 176 | Solavetivone                             | 0.925 | 33.335  | 219.174 | 9.41E-07 | 2.32E-06 | 1.362 | 0.0125 | 0.0064 | 0.406 | -1.300  |
| 177 | Diacetone alcohol                        | 0.980 | 72.839  | 115.075 | 7.96E-08 | 2.62E-04 | 4.572 | 0.0009 | 0.0064 | 0.000 | -11.687 |
| 178 | 5-Aminoimidazole ribonucleotide          | 0.498 | 407.904 | 296.066 | 1.14E-04 | 2.99E-04 | 1.462 | 0.0088 | 0.0047 | 0.382 | -1.387  |
| 179 | Adenine                                  | 0.999 | 174.905 | 134.046 | 1.82E-03 | 2.76E-03 | 1.022 | 0.0014 | 0.0080 | 0.661 | -0.598  |

|     |                                                                                                                |       |         |         |          |          |       |        |        |       |        |
|-----|----------------------------------------------------------------------------------------------------------------|-------|---------|---------|----------|----------|-------|--------|--------|-------|--------|
| 180 | 3,11,12-Trihydroxy-1(10)-spirovetiven-2-one                                                                    | 0.561 | 37.691  | 269.174 | 4.21E-06 | 9.40E-06 | 1.337 | 0.0005 | 0.0003 | 0.448 | -1.159 |
| 181 | Beta-Carboline                                                                                                 | 0.918 | 50.130  | 169.076 | 2.26E-05 | 3.67E-05 | 1.038 | 0.0003 | 0.0002 | 0.615 | -0.702 |
| 182 | Dinoseb acetate                                                                                                | 0.901 | 397.418 | 283.090 | 6.08E-07 | 2.81E-06 | 1.884 | 0.0023 | 0.0013 | 0.216 | -2.210 |
| 183 | Ethylbenzene                                                                                                   | 0.931 | 34.995  | 107.086 | 1.61E-05 | 2.78E-05 | 1.084 | 0.0048 | 0.0027 | 0.579 | -0.788 |
| 184 | Gymnodimine                                                                                                    | 0.476 | 223.867 | 508.339 | 4.03E-06 | 1.07E-05 | 1.395 | 0.0299 | 0.0142 | 0.375 | -1.414 |
| 185 | Phosphoribosyl formamidocarboxamide                                                                            | 0.595 | 418.300 | 367.062 | 1.22E-04 | 2.17E-04 | 1.122 | 0.0026 | 0.0015 | 0.561 | -0.833 |
| 186 | Testosterone                                                                                                   | 0.885 | 33.281  | 289.216 | 1.11E-06 | 3.97E-06 | 1.630 | 0.0253 | 0.0122 | 0.280 | -1.835 |
| 187 | Ganoderal A                                                                                                    | 0.720 | 34.374  | 437.341 | 4.55E-07 | 7.91E-06 | 2.592 | 0.0007 | 0.0004 | 0.057 | -4.121 |
| 188 | Ganoderic acid Mi                                                                                              | 0.761 | 33.248  | 545.384 | 8.07E-07 | 3.69E-06 | 1.837 | 0.0011 | 0.0007 | 0.219 | -2.192 |
| 189 | Pisumsaponin II                                                                                                | 0.470 | 300.376 | 941.511 | 7.65E-05 | 1.53E-04 | 1.236 | 0.0005 | 0.0003 | 0.502 | -0.996 |
| 190 | S-Furanopetasitin                                                                                              | 0.795 | 495.262 | 433.203 | 4.80E-07 | 2.47E-06 | 1.972 | 0.0156 | 0.0078 | 0.194 | -2.367 |
| 191 | 6-[2,3-Dihydroxy-1-(hydroxymethyl)propyl]-1,2-dihydro-7-hydroxy-9-methoxy-cyclopenta[c][1]benzopyran-3,4-dione | 0.894 | 409.850 | 351.104 | 3.83E-05 | 8.03E-05 | 1.270 | 0.0205 | 0.0101 | 0.477 | -1.068 |
| 192 | Fumaric acid                                                                                                   | 0.998 | 247.122 | 115.002 | 4.32E-04 | 7.73E-04 | 1.142 | 0.0313 | 0.0302 | 0.560 | -0.838 |
| 193 | Erythrano-1,4-lactone                                                                                          | 1.00  | 480.90  | 117.02  | 0.00     | 0.00     | 1.09  | 0.01   | 0.02   | 0.62  | -0.693 |

Note: rt is the chromatographic retention time of the substance; Mass is the exact molecular weight of the metabolite; score is the match with the substance in the database; The MEAN p is the relative quantitative mean of the substances in the cooked black bean group; The MEAN ops is the relative quantitative mean of the substances in the steamed black bean group; VIP is the variable projection importance obtained by the OPLS-DA model of the comparison in this group; P-VALUE is the P value obtained by the t-test of the comparison in this group, P value = the probability that the hypothesis is correct but rejected = the number of negative results / the total number of results, which is a test probability for the sample data; Q-VALUE is the hypothesis test statistic (P value) after correction for multiple hypothesis testing The result of , Q value = probability of being rejected but correct = number of false positive results / number of presumed positive results, which is a test probability for the inference obtained by the t test, and a re-statistic for the P value; FOLD CHANGE is the fold relationship of the substance in the comparison between the two groups of experiments; LOG\_FOLDCHANGE FOLD CHANGE is the logarithm with the base 2, "-" means the relative content is low.
